# Supplementary material
Source: PubMed Central journal article supplement (PMC4544320)
Supplement: ja5b06678_si_001.pdf [file ja5b06678_si_001.pdf]

Supporting Information for

**Aminoboration: Addition of B–N  $\sigma$  Bonds Across C–C  $\pi$  Bonds**

Eugene Chong and Suzanne A. Blum\*

*Department of Chemistry, University of California, Irvine, California 92697-2025*

Table of Contents

|                                                                                    |         |
|------------------------------------------------------------------------------------|---------|
| 1. General Methods and Materials                                                   | S2      |
| 2. Synthesis and Compound Characterization                                         |         |
| - IPrAuTFA                                                                         | S3      |
| - <b>1a–1m</b>                                                                     | S3–S12  |
| - General Procedure for <i>N</i> -Sulfonyl Anilines                                | S4      |
| - General Procedure for Sonogashira Cross-Coupling                                 | S4      |
| - General Procedure from HBcat (Table 1)                                           | S13     |
| - General Procedure from ClBcat (Chart 1)                                          | S14     |
| - Stacked <sup>1</sup> H NMR spectra of <b>1d</b> , <b>2d</b> , and <b>3d-Bcat</b> | S15     |
| - Stacked <sup>11</sup> B NMR spectra of ClBcat, <b>2d</b> , and <b>3d-Bcat</b>    | S16     |
| - <b>3a–3m</b>                                                                     | S17–S22 |
| - Gram-Scale Preparation of <b>3g</b> (Scheme 1)                                   | S22     |
| - <b>4</b>                                                                         | S23     |
| - <b>5</b>                                                                         | S24     |
| - <b>6</b> and <b>8a</b>                                                           | S25     |
| 3. NMR Spectra                                                                     | S26–S93 |
| 4. References                                                                      | S94     |

## General Methods and Materials

Unless stated otherwise, reactions were performed in oven-dried or flame-dried glassware using a Schlenk line or a glovebox under a nitrogen atmosphere. Toluene, CH<sub>2</sub>Cl<sub>2</sub>, THF and NEt<sub>3</sub> were purified by passage through an alumina column under argon pressure on a push-still solvent system. *d*<sub>8</sub>-Toluene was dried over sodium-benzophenone ketyl and vacuum transferred before use. All chemicals were used as received from commercial sources unless otherwise noted. Catecholborane (HBcat) was purified by distillation at reduced pressure. Sodium trifluoroacetate (NaTFA) was dried at 130 °C at 10 mTorr for 18 h before use. Analytical thin layer chromatography (TLC) was performed using Merck F<sub>250</sub> plates. TLC plates were visualized under UV irradiation (254 nm) and/or by staining with iodine on silica gel. Flash chromatography was conducted using a Teledyne Isco Combiflash® Rf 200 Automated Flash Chromatography System, and Teledyne Isco Redisep® 35–70 μm silica gel. <sup>1</sup>H and <sup>13</sup>C NMR spectra were recorded on a Bruker DRX-500 spectrometer outfitted with a cryoprobe, or a Bruker AVANCE-600 spectrometer. <sup>11</sup>B NMR spectra were recorded on a Bruker AVANCE-600 spectrometer. Chemical shifts ( $\delta$ ) are reported in parts per million (ppm) and coupling constants (*J*) are given in Hertz (Hz), and referenced to the residual protio solvent ( $\delta$  = 7.26 ppm for CDCl<sub>3</sub>,  $\delta$  = 5.32 ppm for CD<sub>2</sub>Cl<sub>2</sub> and  $\delta$  = 2.08 ppm for *d*<sub>8</sub>-toluene in <sup>1</sup>H NMR spectra;  $\delta$  = 77.16 ppm for CDCl<sub>3</sub> in <sup>13</sup>C NMR spectra). The following abbreviations are used to indicate signal multiplicity: s = singlet, d = doublet, t = triplet, q = quartet, m = multiplet, and br = broad. <sup>11</sup>B NMR spectroscopy experiments are referenced to the absolute frequency of 0 ppm in the <sup>1</sup>H dimension according to the Xi scale. High-resolution mass spectrometry (HRMS) data were obtained at the University of California, Irvine. The ipso carbon (C directly bound to quadrupolar B) could not be observed in the <sup>13</sup>C NMR spectra of indole boronic esters **3**. Broad features in the <sup>11</sup>B NMR spectra are due to the boron materials of the NMR tube.

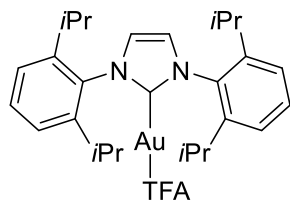

**IPrAuTFA.** The preparation of IPrAuTFA was adapted from a literature procedure.<sup>1</sup> A mixture of IPrAuCl (0.497 g, 0.800 mmol) and AgTFA (0.186 g, 0.840 mmol) in CH<sub>2</sub>Cl<sub>2</sub> (10 mL) in a 20 mL vial, wrapped with aluminum foil, was stirred for 17 h at room temperature. The reaction mixture was filtered through a Celite plug to remove AgCl. The filtrate was concentrated and dried in vacuo to yield IPrAuTFA as a white solid (0.548 g, 98% yield), which was used directly in catalytic reactions.

<sup>1</sup>H NMR (600 MHz, CD<sub>2</sub>Cl<sub>2</sub>): δ 7.57 (t, *J* = 7.8 Hz, 2H), 7.36 (d, *J* = 7.8 Hz, 4H), 7.27 (s, 2H), 2.55 (septet, *J* = 6.9 Hz, 4H), 1.35 (d, *J* = 6.9 Hz, 12H), 1.24 (d, *J* = 6.9 Hz, 12H). This spectrum is in agreement with literature spectral data.<sup>1</sup>

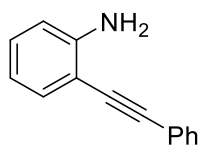

**2-(Phenylethynyl)aniline (1a)** was prepared according to a literature procedure.<sup>2</sup>

<sup>1</sup>H NMR (600 MHz, CDCl<sub>3</sub>): δ 7.55-7.50 (m, 2H), 7.38-7.32 (m, 4H), 7.17-7.12 (m, 1H), 6.75-6.70 (m, 2H), 4.28 (br s, 2H). This spectrum is in agreement with literature spectral data.<sup>2</sup>

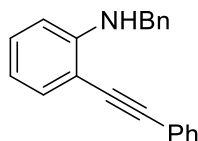

***N*-Benzyl-2-(phenylethynyl)aniline (1b).** The procedure for *N*-alkylation of aniline was adapted from a literature procedure.<sup>3</sup> A mixture of **1a** (0.464 g, 2.40 mmol), benzyl bromide (0.342 g, 2.00 mmol) and NaHCO<sub>3</sub> (0.336 g, 4.00 mmol) in EtOH (10 mL) in a 25 mL round-bottom flask was stirred at room temperature for 20 h. The resulting mixture was diluted with water (10 mL) and extracted with CH<sub>2</sub>Cl<sub>2</sub> (3 × 10 mL). The combined organic layer was washed with brine, dried over MgSO<sub>4</sub>, filtered, and concentrated in vacuo. The resulting crude residue was purified by flash chromatography (elution gradient from 0-10% CH<sub>2</sub>Cl<sub>2</sub> in hexanes) to give title compound as a yellow oil (0.219 g, 39% yield).

<sup>1</sup>H NMR (600 MHz, CDCl<sub>3</sub>): δ 7.51-7.47 (m, 2H), 7.42-7.26 (m, 9H), 7.19-7.14 (m, 1H), 6.67 (t, *J* = 7.4 Hz, 1H), 6.60 (d, *J* = 8.3 Hz, 1H), 5.14 (br t, *J* = 5.3 Hz, 1H), 4.48 (d, *J* = 5.8 Hz, 2H). This spectrum is in agreement with literature spectral data.<sup>4</sup>

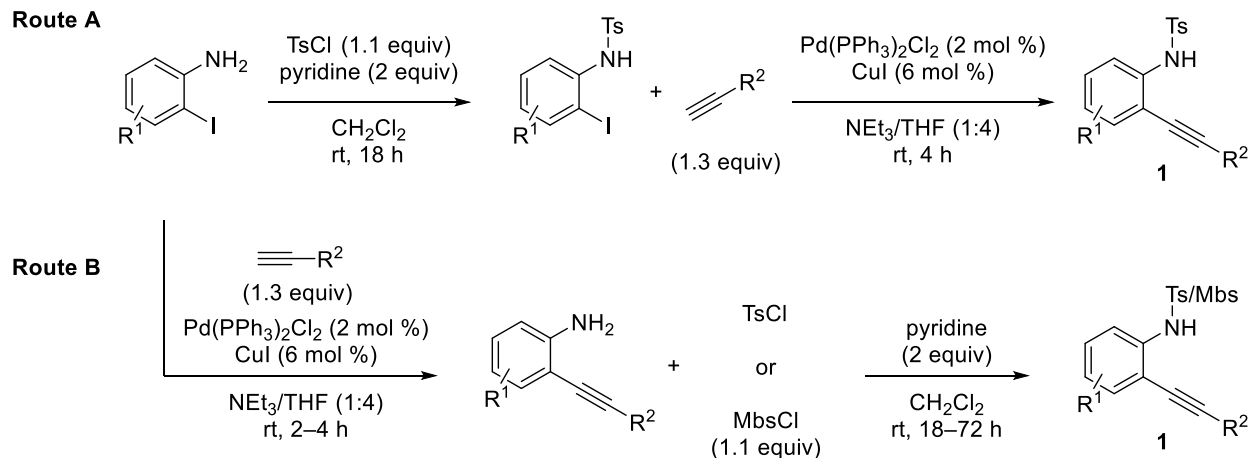

Route A and Route B were used to synthesize substrates **1**. Route A sometimes resulted in self-cyclization of **1** in the Sonogashira cross-coupling step and, thus, route B was alternatively used.

### General Procedure for *N*-Sulfonyl Anilines

A solution of aniline (1.00 equiv, 0.2–0.5 M in  $\text{CH}_2\text{Cl}_2$ ) and  $\text{TsCl}$  (1.10 equiv) or  $\text{MbsCl}$  (1.10 equiv), pyridine (2.00 equiv) in  $\text{CH}_2\text{Cl}_2$  was stirred at room temperature overnight. The reaction was monitored by TLC. When the reaction was complete or no further reactivity seen, water was added and extracted with  $\text{CH}_2\text{Cl}_2$  (3 $\times$ ). The combined organic layer was washed with brine, dried over  $\text{MgSO}_4$ , filtered, and concentrated in vacuo. The resulting crude residue was purified by flash chromatography.

### General Procedure for Sonogashira Cross-Coupling

To a stirring suspension containing 2-iodoaniline (1.00 equiv, 0.2 M in  $\text{NEt}_3/\text{THF}$ ),  $\text{Pd}(\text{PPh}_3)_2\text{Cl}_2$  (2 mol %),  $\text{CuI}$  (6 mol %) in  $\text{NEt}_3/\text{THF}$  (1:4) under  $\text{N}_2$  atmosphere, alkyne (1.30 equiv) was added and stirred at room temperature. The reaction was monitored by TLC. When the reaction was complete, the reaction mixture was diluted with  $\text{EtOAc}$  and filtered through a pad of silica gel. The filtrate was concentrated in vacuo and purified by flash chromatography.

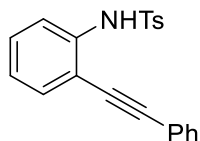

**4-Methyl-*N*-(2-(phenylethynyl)phenyl)benzenesulfonamide (1c)** was synthesized from **1a** (0.386 g, 2.00 mmol) using the general procedure for *N*-sulfonyl anilines with a reaction time of 18.5 h. Purification by flash chromatography (elution gradient from 5-10% EtOAc in hexanes) gave the title compound as a faint yellow solid (0.436 g, 63% yield).

**<sup>1</sup>H NMR** (600 MHz, CDCl<sub>3</sub>): δ 7.68 (d, *J* = 8.3 Hz, 2H), 7.63 (d, *J* = 8.3 Hz, 1H), 7.49-7.45 (m, 2H), 7.42-7.36 (m, 4H), 7.32-7.27 (m, 1H), 7.20 (br s, 1H), 7.17 (d, *J* = 8.2 Hz, 2H), 7.07 (t, *J* = 7.6 Hz, 1H), 2.34 (s, 3H). This spectrum is in agreement with literature spectral data.<sup>5</sup>

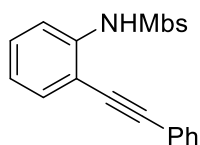

**4-Methoxy-*N*-(2-(phenylethynyl)phenyl)benzenesulfonamide (1d)** was synthesized from **1a** (0.386 g, 2.00 mmol) using the general procedure for *N*-sulfonyl anilines with a reaction time of 19.5 h. Purification by flash chromatography (elution gradient from 10-20% EtOAc in hexanes) gave the title compound as a white solid (0.720 g, 99% yield).

**<sup>1</sup>H NMR** (600 MHz, CDCl<sub>3</sub>): δ 7.73-7.69 (m, 2H), 7.63 (d, *J* = 8.2 Hz, 1H), 7.49-7.46 (m, 2H), 7.41-7.36 (m, 4H), 7.32-7.27 (m, 1H), 7.18 (br s, 1H), 7.00-7.05 (m, 1H), 6.85-6.81 (m, 2H), 3.78 (s, 3H). This spectrum is in agreement with literature spectral data.<sup>5</sup>

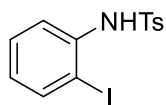

***N*-(2-Iodophenyl)-4-methylbenzenesulfonamide (SI-1)** was synthesized from 2-iodoaniline (5.48 g, 25.0 mmol) using the general procedure for *N*-sulfonyl anilines with a reaction time of 18 h. Purification by chromatography (elution gradient from 10-20% EtOAc in hexanes) gave the title compound as an off-white solid (8.06 g, 86% yield).

**<sup>1</sup>H NMR** (600 MHz, CDCl<sub>3</sub>): δ 7.67-7.61 (m, 4H), 7.33-7.28 (m, 1H), 7.22 (d, *J* = 8.1 Hz, 2H), 6.83 (td, *J* = 7.8, 1.3 Hz, 1H), 6.79 (br s, 1H), 2.38 (s, 3H). This spectrum is in agreement with literature spectral data.<sup>6</sup>

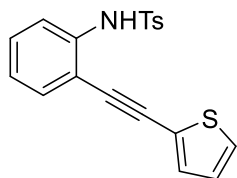

**4-Methyl-N-(2-(thiophen-2-ylethynyl)phenyl)benzenesulfonamide (1e)** was synthesized from **SI-1** (0.746 g, 2.00 mmol) and 2-ethynylthiophene (0.281 g, 2.60 mmol) using the general procedure for Sonogashira cross-coupling with a reaction time of 4 h. Purification by flash chromatography (elution gradient from 5-10% EtOAc in hexanes) gave the title compound as a brown solid (0.482 g, 68% yield).

$^1\text{H NMR}$  (600 MHz,  $\text{CDCl}_3$ ):  $\delta$  7.67-7.62 (m, 3H), 7.39-7.26 (m, 4H), 7.19 (d,  $J = 8.1$  Hz, 2H), 7.10-7.04 (m, 3H), 2.35 (s, 3H). This spectrum is in agreement with literature spectral data.<sup>7</sup>

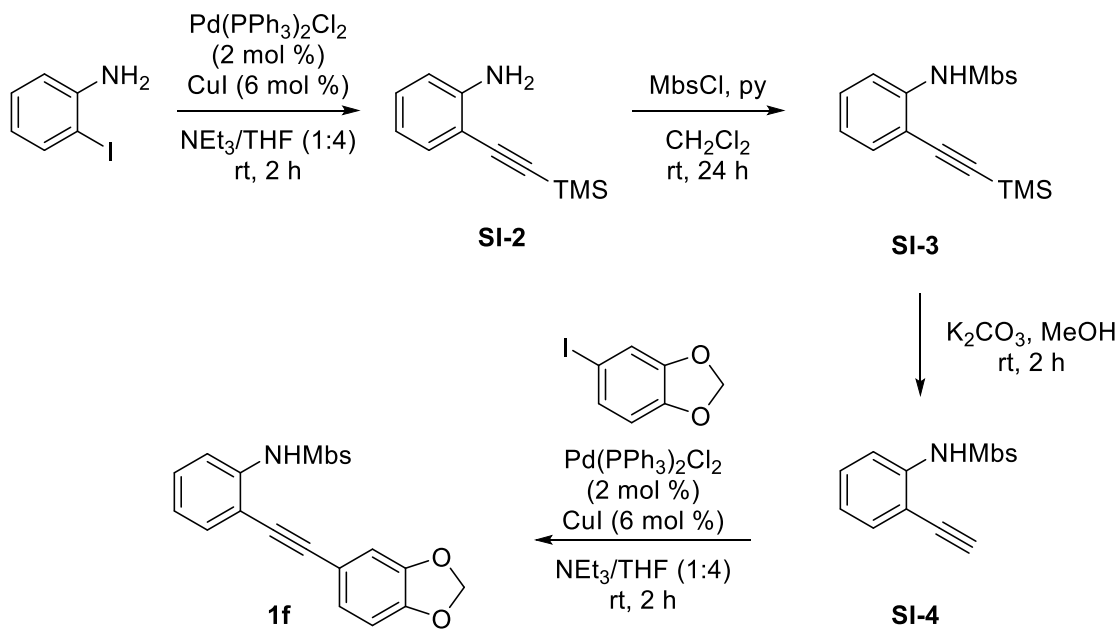

**2-((Trimethylsilyl)ethynyl)aniline (SI-2)** was synthesized from 2-iodoaniline (1.10 g, 5.00 mmol) and trimethylsilylacetylene (0.92 mL, 6.5 mmol) using the general procedure for Sonogashira cross-coupling with a reaction time of 2 h. Purification by flash chromatography (elution gradient from 0-10% EtOAc in hexanes) gave the title compound as a brown liquid (0.862 g, 91% yield).

$^1\text{H NMR}$  (600 MHz,  $\text{CDCl}_3$ ):  $\delta$  7.31-7.27 (m, 1H), 7.13-7.09 (m, 1H), 6.70-6.63 (m, 2H), 4.22 (br s, 2H), 0.26 (s, 9H). This spectrum is in agreement with literature spectral data.<sup>8</sup>

**4-Methoxy-*N*-(2-((trimethylsilyl)ethynyl)phenyl)benzenesulfonamide (SI-3)** was synthesized from **SI-2** (0.862 g, 4.55 mmol) using the general procedure for *N*-sulfonyl anilines with a reaction time of 24 h. Purification by flash chromatography (20% EtOAc in hexanes), followed by recrystallization from hexanes gave the title compound as a colourless crystalline solid (1.30 g, 79% yield).

**<sup>1</sup>H NMR** (500 MHz, CDCl<sub>3</sub>): δ 7.71-7.66 (m, 2H), 7.60 (d, *J* = 8.1 Hz, 1H), 7.31-7.24 (m, 2H), 7.17 (br s, 1H), 7.00 (td, *J* = 7.6, 1.0 Hz, 1H), 6.88-6.83 (m, 2H), 3.81 (s, 3H), 0.27 (s, 9H). **<sup>13</sup>C NMR** (125 MHz, CDCl<sub>3</sub>): δ 163.3, 138.3, 132.1, 130.7, 129.9, 129.6, 124.4, 119.9, 114.4, 114.3, 102.4, 99.7, 55.7, 0.04. **HRMS** (ESI): *m/z* calcd for C<sub>18</sub>H<sub>21</sub>NO<sub>3</sub>SSiNa [M+Na]<sup>+</sup>: 382.0909. Found: 382.0897.

***N*-(2-Ethynylphenyl)-4-methoxybenzenesulfonamide (SI-4)**. A suspension of **SI-3** (0.560 g, 1.56 mmol) and K<sub>2</sub>CO<sub>3</sub> (0.323 g, 2.34 mmol) in MeOH (4 mL) was stirred vigorously at room temperature for 2 h. The reaction mixture was dried over MgSO<sub>4</sub>, filtered through a Celite plug, and concentrated in vacuo. The crude residue was purified by flash chromatography (20% EtOAc in hexanes) to give the title compound as a pink oil (0.320 g, 71% yield).

**<sup>1</sup>H NMR** (500 MHz, CDCl<sub>3</sub>): δ 7.76-7.71 (m, 2H), 7.59 (dd, *J* = 8.4, 0.6 Hz), 7.34 (dd, *J* = 7.7, 1.5 Hz), 7.31-7.26 (m, 1H), 7.21 (br s, 1H), 7.01 (td, *J* = 7.7, 1.1 Hz, 1H), 6.90-6.85 (m, 2H), 3.82 (s, 3H), 3.37 (s, 1H). **<sup>13</sup>C NMR** (125 MHz, CDCl<sub>3</sub>): δ 163.4, 138.7, 132.6, 130.5, 130.3, 129.7, 124.3, 119.5, 114.3, 112.8, 84.5, 78.8, 55.7. **HRMS** (ESI): *m/z* calcd for C<sub>15</sub>H<sub>13</sub>NO<sub>3</sub>SNa [M+Na]<sup>+</sup>: 310.0514. Found: 310.0504.

***N*-(2-(Benzo[*d*][1,3]dioxol-5-ylethynyl)phenyl)-4-methoxybenzenesulfonamide (1f)**. To a mixture of 1-iodo-3,4-methylenedioxybenzene (0.372 g, 1.50 mmol), Pd(PPh<sub>3</sub>)<sub>2</sub>Cl<sub>2</sub> (10.5 mg, 0.0150 mmol), CuI (8.6 mg, 0.045 mmol) in THF/NEt<sub>3</sub> (3 mL: 1 mL) under N<sub>2</sub> atmosphere, a solution of **SI-4** (0.215 g, 0.748 mmol) in THF (1 mL) was added and stirred at room temperature. After 2 h, the reaction mixture was diluted with EtOAc, filtered through a pad of Celite, and concentrated in vacuo. Purification by flash column chromatography (20% EtOAc in hexanes), followed by trituration with minimal cold Et<sub>2</sub>O gave the title compound as an off-white solid (0.201 g, 66% yield).

**<sup>1</sup>H NMR** (500 MHz, CDCl<sub>3</sub>): δ 7.72-7.68 (m, 2H), 7.61 (d, *J* = 8.2 Hz, 1H), 7.34 (dd, *J* = 7.7, 1.4 Hz, 1H), 7.28 (td, *J* = 7.9, 1.5 Hz, 1H), 7.14 (br s, 1H), 7.06 (td, *J* = 7.6, 1.0 Hz, 1H), 7.00 (dd, *J* = 8.0, 1.6 Hz, 1H), 6.89 (d, *J* = 1.6 Hz, 1H), 6.86-6.80 (m, 3H), 6.03 (s, 2H), 3.79 (s, 3H). **<sup>13</sup>C NMR** (125 MHz, CDCl<sub>3</sub>): δ 163.3, 148.7, 147.8, 137.6, 132.0, 130.7, 129.6, 126.6, 124.7, 120.5, 115.3, 115.0, 114.3, 111.5, 108.8, 101.7, 96.2, 82.3, 55.7. **HRMS** (ESI): *m/z* calcd for C<sub>22</sub>H<sub>17</sub>NO<sub>5</sub>SNa [M+Na]<sup>+</sup>: 430.0725. Found: 430.0725.

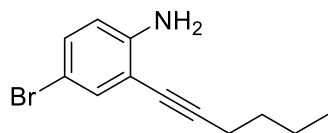

**4-Bromo-2-(hex-1-yn-1-yl)aniline (SI-5)** was synthesized from 4-bromo-2-iodoaniline (1.49 g, 5.00 mmol) and 1-hexyne (0.75 mL, 6.5 mmol) using the general procedure for Sonogashira cross-coupling with a reaction time of 2 h. Purification by flash column chromatography (elution gradient from 5-10% EtOAc in hexanes) gave the title compound as a brown oil (1.20 g, 95% yield).

$^1\text{H NMR}$  (500 MHz,  $\text{CDCl}_3$ ):  $\delta$  7.34 (d,  $J = 2.3$  Hz, 1H), 7.15 (dd,  $J = 8.6, 2.3$  Hz, 1H), 6.56 (d,  $J = 8.6$  Hz, 1H), 4.16 (br s, 2H), 2.46 (t,  $J = 7.0$  Hz, 2H), 1.64-1.55 (m, 2H), 1.52-1.43 (m, 2H), 0.95 (t,  $J = 7.3$  Hz, 3H).  $^{13}\text{C NMR}$  (125 MHz,  $\text{CDCl}_3$ ):  $\delta$  146.8, 134.3, 131.7, 115.7, 111.0, 109.0, 97.2, 75.9, 31.0, 22.2, 19.4, 13.8. **HRMS** (ESI):  $m/z$  calcd for  $\text{C}_{12}\text{H}_{13}\text{BrN}$  [ $\text{M}-\text{H}$ ] $^-$ : 250.0231. Found: 250.0228.

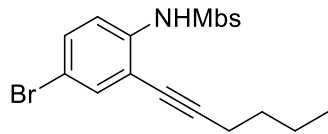

***N*-(4-Bromo-2-(hex-1-yn-1-yl)phenyl)-4-methoxybenzenesulfonamide (1g)** was synthesized from **SI-5** (1.20 g, 4.76 mmol) using the general procedure for *N*-sulfonyl anilines with a reaction time of 19 h. Purification by flash column chromatography (elution gradient from 5-10% EtOAc in hexanes) gave the title compound as a yellow oil (1.34 g, 67% yield).

$^1\text{H NMR}$  (600 MHz,  $\text{CDCl}_3$ ):  $\delta$  7.70-7.67 (m, 2H), 7.44 (d,  $J = 8.8$  Hz, 1H), 7.37 (d,  $J = 2.3$  Hz, 1H), 7.31 (dd,  $J = 8.7, 2.3$  Hz, 1H), 7.12 (br s, 1H), 6.89-6.86 (m, 2H), 3.82 (s, 3H), 2.41 (t,  $J = 7.1$  Hz, 2H), 1.60-1.53 (m, 2H), 1.49-1.41 (m, 2H), 0.97 (t,  $J = 7.3$  Hz, 3H).  $^{13}\text{C NMR}$  (150 MHz,  $\text{CDCl}_3$ ):  $\delta$  163.5, 136.9, 134.5, 131.9, 130.5, 129.5, 121.0, 117.0, 117.0, 114.3, 99.4, 74.4, 55.7, 30.6, 22.2, 19.3, 13.7. **HRMS** (ESI):  $m/z$  calcd for  $\text{C}_{19}\text{H}_{20}\text{BrNO}_3\text{SNa}$  [ $\text{M}+\text{Na}$ ] $^+$ : 444.0245. Found: 444.0247.

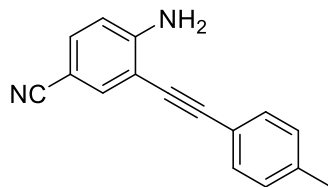

**4-Amino-3-(*p*-tolylethynyl)benzonitrile (SI-6)** was synthesized from 4-cyano-2-iodoaniline (1.22 g, 5.00 mmol) and 4-ethynyltoluene (0.824 mL, 6.50 mmol) using the general procedure for Sonogashira cross-coupling with a reaction time of 4 h. Purification by flash column chromatography (elution gradient from 10-30% EtOAc in hexanes) gave the title compound as a tan solid (0.992 g, 86% yield).

$^1\text{H NMR}$  (500 MHz,  $\text{CDCl}_3$ ):  $\delta$  7.63 (d,  $J = 1.9$  Hz, 1H), 7.42 (d,  $J = 8.1$  Hz, 2H), 7.36 (dd,  $J = 8.5, 2.0$  Hz, 1H), 7.18 (d,  $J = 7.9$  Hz, 2H), 6.71 (d,  $J = 8.5$  Hz, 1H), 4.78 (br s, 2H), 2.39 (s, 3H).  $^{13}\text{C NMR}$  (125



MHz, CDCl<sub>3</sub>):  $\delta$  151.0, 139.3, 136.4, 133.2, 131.6, 129.4, 119.6, 119.3, 114.0, 108.6, 100.3, 96.6, 82.8, 21.7. **HRMS** (ESI):  $m/z$  calcd for C<sub>16</sub>H<sub>12</sub>N<sub>2</sub>Na [M+Na]<sup>+</sup>: 255.0898. Found: 255.0896.

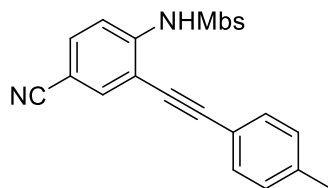

**N-(4-Cyano-2-(p-tolylethynyl)phenyl)-4-methoxybenzenesulfonamide (1h)** was synthesized from **SI-6** (0.978 g, 4.21 mmol) using the general procedure for *N*-sulfonyl anilines with a reaction time of 72 h. Purification by flash column chromatography (elution gradient from 10-20% EtOAc in hexanes) gave the title compound as a white solid (0.693 g, 41% yield).

**<sup>1</sup>H NMR** (500 MHz, CDCl<sub>3</sub>):  $\delta$  7.81-7.76 (m, 2H), 7.68-7.63 (m, 2H), 7.53-7.49 (m, 2H), 7.42 (d,  $J$  = 8.1 Hz, 2H), 7.23 (d,  $J$  = 7.9 Hz, 2H), 6.94-6.89 (m, 2H), 3.83 (s, 3H), 2.42 (s, 3H). **<sup>13</sup>C NMR** (125 MHz, CDCl<sub>3</sub>):  $\delta$  163.8, 141.4, 140.4, 135.8, 132.9, 131.8, 130.1, 129.6, 118.4, 118.1, 118.0, 114.7, 107.6, 99.1, 81.0, 55.8, 21.8. **HRMS** (ESI):  $m/z$  calcd for C<sub>23</sub>H<sub>18</sub>N<sub>2</sub>O<sub>3</sub>SNa [M+Na]<sup>+</sup>: 425.0936. Found: 425.0937.

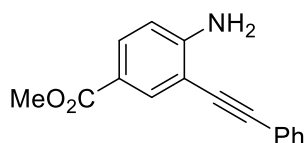

**Methyl 4-amino-3-(phenylethynyl)benzoate (SI-7)** was synthesized from methyl 4-amino-3-iodobenzoate (0.554 g, 2.00 mmol) and phenylacetylene (0.29 mL, 2.6 mmol) using the general procedure for Sonogashira cross-coupling with a reaction time of 3 h. Purification by flash column chromatography (elution gradient from 20-30% EtOAc in hexanes) gave the title compound as a brown solid (0.499 g, 99% yield).

**<sup>1</sup>H NMR** (600 MHz, CDCl<sub>3</sub>):  $\delta$  8.09 (d,  $J$  = 2.0 Hz, 1H), 7.82 (dd,  $J$  = 8.5, 2.0 Hz, 1H), 7.54-7.51 (m, 2H), 7.39-7.34 (m, 3H), 6.71 (d,  $J$  = 8.5 Hz, 1H), 4.69 (br s, 2H), 3.87 (s, 3H). This spectrum is in agreement with literature spectral data.<sup>9</sup>

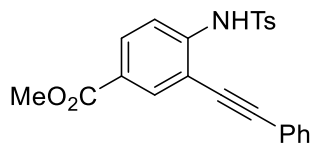

**Methyl 4-((4-methylphenyl)sulfonamido)-3-(phenylethynyl)benzoate (1i)** was synthesized from **SI-7** (0.499 g, 1.99 mmol) using general the procedure for *N*-sulfonyl anilines with a reaction time of 72 h.

Purification by flash column chromatography (elution gradient from 5-10% EtOAc in hexanes) gave the title compound as a white solid (0.490 g, 61% yield).

$^1\text{H NMR}$  (500 MHz,  $\text{CDCl}_3$ ):  $\delta$  8.08 (d,  $J = 1.5$  Hz, 1H), 7.93 (dd,  $J = 8.7, 1.5$  Hz, 1H), 7.73 (d,  $J = 8.2$  Hz, 2H), 7.64 (d,  $J = 8.7$  Hz, 1H), 7.53-7.50 (m, 2H), 7.48 (s, 1H), 7.43-7.40 (m, 3H), 7.22 (d,  $J = 8.0$  Hz, 2H), 3.88 (s, 3H), 2.36 (s, 3H). This spectrum is in agreement with literature spectral data.<sup>10</sup>

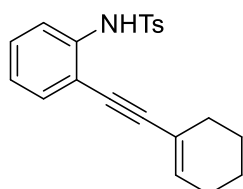

***N*-(2-(Cyclohex-1-en-1-ylethynyl)phenyl)-4-methylbenzenesulfonamide (1j)** was synthesized from **SI-1** (0.746 g, 2.00 mmol) and 1-ethynylcyclohexene (0.31 mL, 2.6 mmol) using the general procedure for Sonogashira cross-coupling with a reaction time of 4 h. Purification by flash column chromatography (5% EtOAc in hexanes) gave the title compound as a yellow orange solid (0.543 g, 77% yield).

$^1\text{H NMR}$  (600 MHz,  $\text{CDCl}_3$ ):  $\delta$  7.66 (d,  $J = 8.2$  Hz, 2H), 7.57 (d,  $J = 8.2$  Hz, 1H), 7.26-7.18 (m, 4H), 7.15 (br s, 1H), 7.00 (t,  $J = 7.6$  Hz, 1H), 6.22-6.19 (m, 1H), 2.36 (s, 3H), 2.20-2.15 (m, 4H), 1.73-1.68 (m, 2H), 1.67-1.62 (m, 2H). This spectrum is in agreement with literature spectral data.<sup>7</sup>

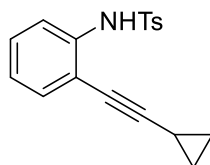

***N*-(2-(Cyclopropylethynyl)phenyl)-4-methylbenzenesulfonamide (1k)** was synthesized from **SI-1** (0.746 g, 2.00 mmol) and cyclopropylacetylene (0.22 mL, 2.6 mmol) using the general procedure for Sonogashira cross-coupling with a reaction time of 4 h. Purification by flash column chromatography (elution gradient from 5-10% EtOAc in hexanes) gave the title compound as a yellow solid (0.192 g, 31% yield).

$^1\text{H NMR}$  (600 MHz,  $\text{CDCl}_3$ ):  $\delta$  7.65 (d,  $J = 8.3$  Hz, 2H), 7.54 (d,  $J = 8.1$  Hz, 1H), 7.23-7.18 (m, 4H), 7.15 (br s, 1H), 6.97 (td,  $J = 7.6, 1.1$  Hz, 1H), 2.37 (s, 3H), 1.46-1.41 (m, 1H), 0.95-0.90 (m, 2H), 0.78-0.74 (m, 2H). This spectrum is in agreement with literature spectral data.<sup>7</sup>

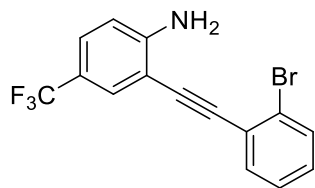

**2-((2-Bromophenyl)ethynyl)-4-(trifluoromethyl)aniline (SI-8)** was synthesized from 2-iodo-4-(trifluoromethyl)aniline (0.718 g, 2.50 mmol) and 1-bromo-2-ethynylbenzene (0.588 g, 3.25 mmol) using the general procedure for Sonogashira cross-coupling with a reaction time of 2.5 h. Purification by flash column chromatography (elution gradient from 5-10% EtOAc in hexanes) gave the title compound as a tan solid (0.785 g, 92% yield).

$^1\text{H NMR}$  (500 MHz,  $\text{CDCl}_3$ ):  $\delta$  7.66-7.61 (m, 2H), 7.58 (d,  $J = 7.8$  Hz, 1H), 7.70-7.30 (m, 2H), 7.24-7.18 (m, 1H), 6.76 (d,  $J = 8.6$  Hz, 1H), 4.82 (br s, 2H).  $^{13}\text{C NMR}$  (125 MHz,  $\text{CDCl}_3$ ):  $\delta$  150.9, 133.2, 132.5, 129.8, 129.5 (q,  $J = 3.9$  Hz), 127.5, 127.1 (q,  $J = 3.6$  Hz), 125.2, 125.1, 123.5 (q,  $J = 270.8$  Hz), 119.8 (q,  $J = 33.0$  Hz), 113.8, 106.9, 94.3, 89.6. **HRMS** (ESI):  $m/z$  calcd for  $\text{C}_{15}\text{H}_{10}\text{BrF}_3\text{N}$   $[\text{M}+\text{H}]^+$ : 339.9949. Found: 339.9944.

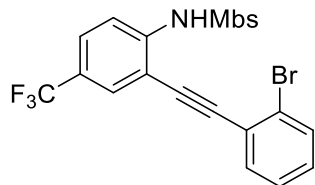

**N-(2-((2-Bromophenyl)ethynyl)-4-(trifluoromethyl)phenyl)-4-methoxybenzenesulfonamide (1)** was synthesized from **SI-8** (0.776 g, 2.28 mmol) using the general procedure for *N*-sulfonyl anilines with a reaction time of 24 h. Purification by flash column chromatography (elution gradient from 10-20% EtOAc in hexanes) gave the title compound as a white solid (0.754 g, 65% yield).

$^1\text{H NMR}$  (500 MHz,  $\text{CDCl}_3$ ):  $\delta$  8.09 (br s, 1H), 7.86-7.82 (m, 2H), 7.76 (d,  $J = 8.7$  Hz, 1H), 7.71-7.67 (m, 2H), 7.56 (dd,  $J = 7.7, 1.6$  Hz, 1H), 7.52 (dd,  $J = 8.7, 1.7$  Hz, 1H), 7.37 (td,  $J = 7.5, 1.0$  Hz, 1H), 7.29 (td,  $J = 8.0, 1.7$  Hz, 1H), 6.92-6.87 (m, 2H), 3.81 (s, 3H).  $^{13}\text{C NMR}$  (125 MHz,  $\text{CDCl}_3$ ):  $\delta$  163.6, 141.5, 133.2, 132.6, 130.7, 130.4, 129.8, 129.0 (q,  $J = 3.8$  Hz), 127.6, 126.9 (q,  $J = 3.6$  Hz), 125.81, 125.8 (q,  $J = 33.3$  Hz), 124.0, 123.7 (q,  $J = 271.9$  Hz), 117.6, 114.6, 112.8, 96.5, 87.4, 55.7. **HRMS** (ESI):  $m/z$  calcd for  $\text{C}_{22}\text{H}_{15}\text{BrF}_3\text{NO}_3\text{SNa}$   $[\text{M}+\text{Na}]^+$ : 531.9806. Found: 531.9794.

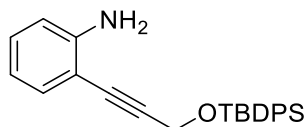

**2-(3-((*t*-Butyldiphenylsilyl)oxy)prop-1-yn-1-yl)aniline (SI-9)** was synthesized from 2-iodoaniline (1.09 g, 5.00 mol) and *t*-butyldiphenyl(prop-2-yn-1-yloxy)silane (1.91 g, 6.50 mmol) using the general procedure for Sonogashira cross-coupling with a reaction time of 4 h. Purification by flash column chromatography (elution gradient from 0-5% EtOAc in hexanes) gave the title compound as an orange oil (1.09 g, 56% yield).

$^1\text{H NMR}$  (500 MHz,  $\text{CDCl}_3$ ):  $\delta$  7.79-7.75 (m, 4H), 7.48-7.38 (m, 6H), 7.21 (dd,  $J = 7.9, 1.4$  Hz, 1H), 7.11 (td,  $J = 7.8, 1.4$  Hz, 1H), 6.69-6.64 (m, 2H), 4.62 (s, 2H), 4.06 (br s, 2H), 1.10 (s, 9H).  $^{13}\text{C NMR}$  (125 MHz,  $\text{CDCl}_3$ ):  $\delta$  148.1, 135.8, 133.3, 132.5, 130.0, 129.7, 127.9, 117.8, 114.3, 107.7, 93.0, 81.8, 53.5, 26.9, 19.3. **HRMS** (ESI):  $m/z$  calcd for  $\text{C}_{25}\text{H}_{27}\text{NOSiNa}$   $[\text{M}+\text{Na}]^+$ : 408.1760. Found: 408.1761.

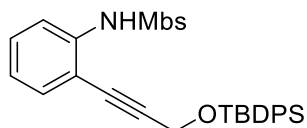

***N*-(2-(3-((*t*-Butyldiphenylsilyl)oxy)prop-1-yn-1-yl)phenyl)-4-methoxybenzenesulfonamide (1m)** was synthesized from **SI-9** (0.524 g, 1.36 mmol) using the general procedure for *N*-sulfonyl anilines with a reaction time of 18 h. Purification by flash column chromatography (elution gradient from 10-20% EtOAc in hexanes) gave the title compound as a pale yellow gum (0.580 g, 77% yield).

$^1\text{H NMR}$  (500 MHz,  $\text{CDCl}_3$ ):  $\delta$  7.76-7.72 (m, 4H), 7.70-7.66 (m, 2H), 7.57 (d,  $J = 8.2$  Hz, 1H), 7.50-7.40 (m, 6H), 7.28-7.23 (m, 1H), 7.18 (dd,  $J = 7.7, 1.3$  Hz, 1H), 7.06 (br s, 1H), 6.99 (td,  $J = 7.6, 1.2$  Hz, 1H), 6.82-6.78 (m, 2H), 4.52 (s, 2H), 3.76 (s, 3H), 1.11 (s, 9H).  $^{13}\text{C NMR}$  (125 MHz,  $\text{CDCl}_3$ ):  $\delta$  163.3, 138.0, 135.7, 132.9, 132.4, 130.6, 130.2, 129.7, 129.6, 128.0, 124.3, 119.9, 114.2, 114.0, 94.7, 79.8, 55.6, 53.1, 26.9, 19.3. **HRMS** (ESI):  $m/z$  calcd for  $\text{C}_{32}\text{H}_{33}\text{NO}_4\text{SSiNa}$   $[\text{M}+\text{Na}]^+$ : 578.1797. Found: 578.1787.

### General Procedure from HBcat (Table 1)

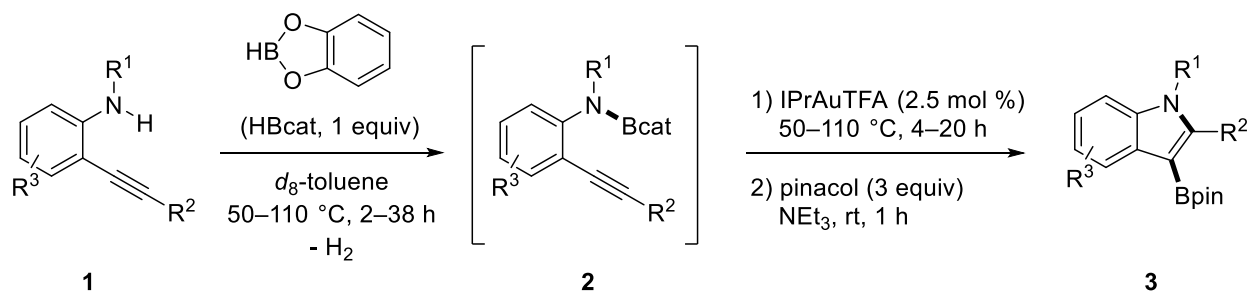

Inside a nitrogen-filled glovebox, to a solution of amine **1** (0.100 mmol) in  $d_8$ -toluene (0.6 mL) in a J. Young NMR tube, HBcat (10.7  $\mu$ L, 0.100 mmol) was added using a gastight syringe. The J. Young NMR tube was sealed with a Teflon cap and heated to the specified temperature (50–110 °C) and time (2–38 h) outside the glovebox. The B–N bond formation and release of  $H_2$  was monitored by  $^1H$  and  $^{11}B$  NMR spectroscopy for the formation of **2** (66–83% conv). Then the J. Young NMR tube was brought back into a glovebox, IPrAuTFA (1.7 mg, 0.0025 mmol) in  $d_8$ -toluene (0.2 mL) was added to the tube. Outside the glovebox, the reaction was heated to specified temperatures (50–110 °C) and time (4–20 h). Once full consumption of **2** was observed by  $^1H$  and  $^{11}B$  NMR spectroscopy, the J. Young NMR tube was brought into a glovebox, and the reaction contents were poured into a dram vial containing a solution of pinacol (35.5 mg, 0.300 mmol) in  $NEt_3$  (0.21 mL, 1.5 mmol). Toluene ( $3 \times 0.2$  mL) rinses were used to ensure full transfer from the NMR tube to the vial. The vial was sealed with a Teflon cap and stirred for 1 h outside the glovebox. The reaction mixture was then concentrated in vacuo and purified by flash chromatography.

### General Procedure from ClBcat (Chart 1)

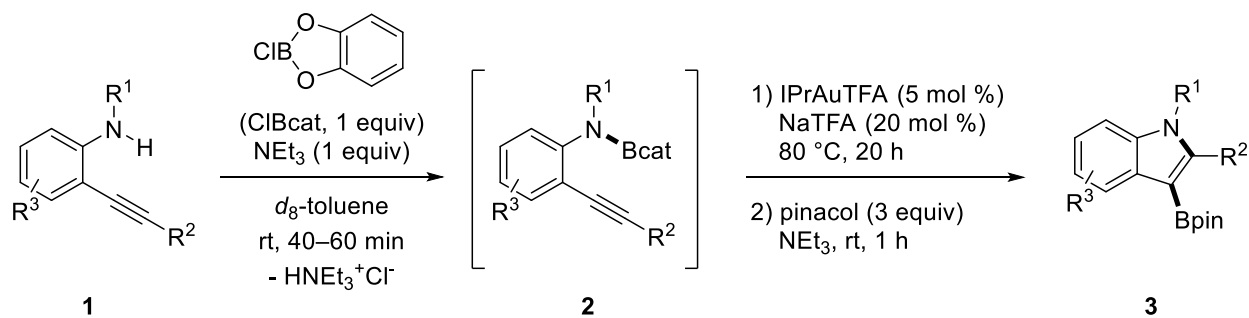

Inside a nitrogen-filled glovebox, to a mixture of amine **1** (0.200 mmol) and ClBcat (30.9 mg, 0.200 mmol) in *d*<sub>8</sub>-toluene (0.4 mL) in a dram vial, NEt<sub>3</sub> (28 μL, 0.20 mmol) was added using a gastight syringe. The vial was sealed with a Teflon cap and stirred for 40–60 min at room temperature, during which HNEt<sub>3</sub>Cl salt was formed. The resulting slurry was filtered through a plug of Celite (~2 cm in a Pasteur pipette), and additional *d*<sub>8</sub>-toluene (2 × 0.2 mL) rinses were used to ensure full transfer. The filtrate was mixed with IPrAuTFA (7.0 mg, 0.010 mmol) and NaTFA (5.4 mg, 0.040 mmol) and transferred to a J. Young NMR tube with one rinse of *d*<sub>8</sub>-toluene (0.2 mL) to aid the transfer to make a total reaction volume of 1 mL. The J. Young NMR tube was sealed with a Teflon cap and heated to 80 °C for 20 h outside the glovebox. Once the reaction was complete (>95% conversion) as monitored by <sup>1</sup>H and <sup>11</sup>B NMR spectroscopy, the J. Young NMR tube was brought into a glovebox, and the reaction contents were poured into a dram vial containing a solution of pinacol (70.9 mg, 0.600 mmol) in NEt<sub>3</sub> (0.42 mL, 3.0 mmol). Toluene (3 × 0.2 mL) rinses were used to ensure full transfer from the NMR tube to the vial. The vial was sealed with a Teflon cap and stirred for 1 h outside the glovebox. The reaction mixture was then concentrated in vacuo and purified by flash chromatography.

**A control experiment using NaTFA additive.** Following the general procedure from ClBcat, the reaction of in situ prepared **2d** (0.200 mmol) and NaTFA (20 mol %, 5.4 mg, 0.040 mmol) in *d*<sub>8</sub>-toluene (1 mL) for 20 h at 80 °C in a J. Young NMR tube showed no reactivity, as monitored by <sup>1</sup>H and <sup>11</sup>B NMR spectroscopy.

An example of in situ monitoring of the aminoboration reaction by NMR spectroscopy for the synthesis of **3d** from **1d** is shown in Figure S1 and Figure S2 below.

**Figure S1. Stacked  $^1\text{H}$  NMR (600 MHz,  $d_8$ -toluene) Spectra of 1d (top), 2d (middle), and 3d-Bcat (bottom)**

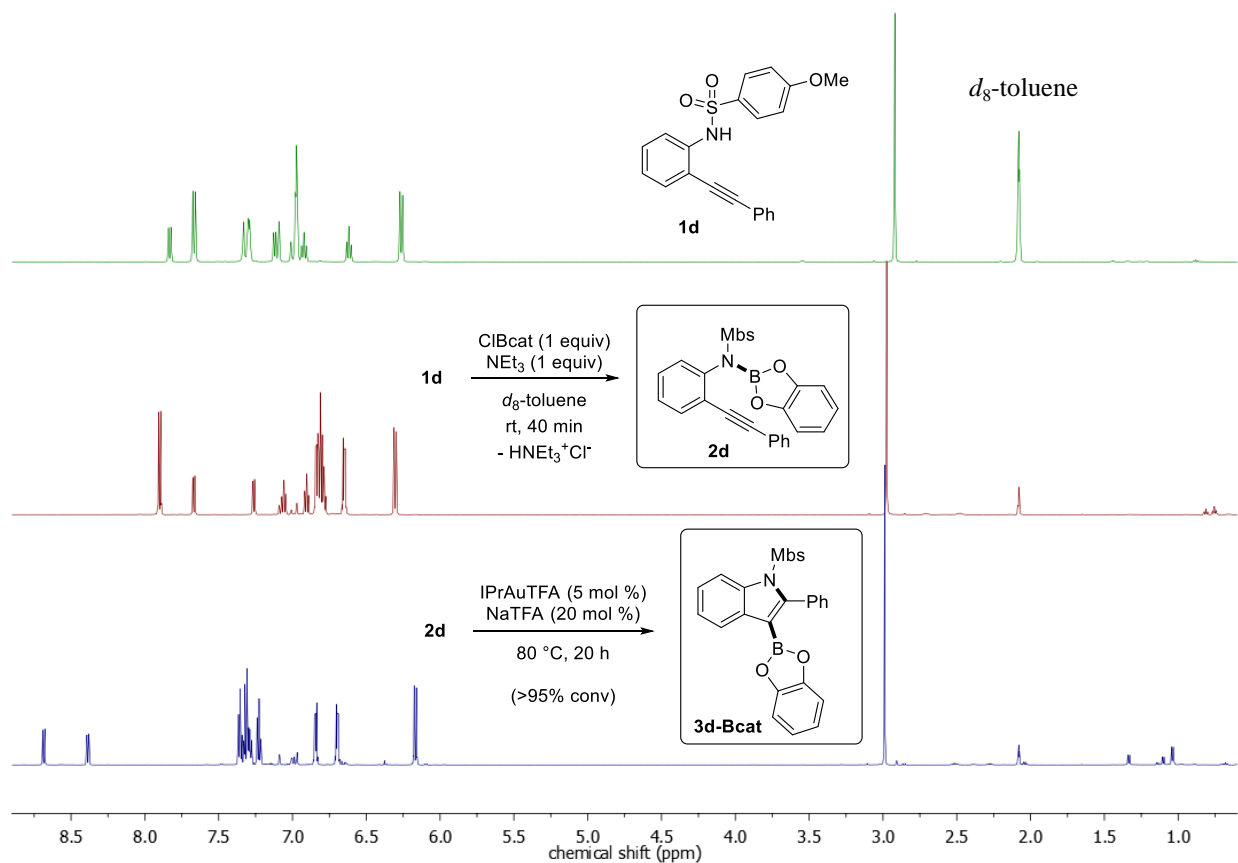

Figure S2. Stacked  $^{11}\text{B}$  NMR (193 MHz,  $d_8$ -toluene) Spectra of ClBcat (top), 2d (middle), and 3d-Bcat (bottom)

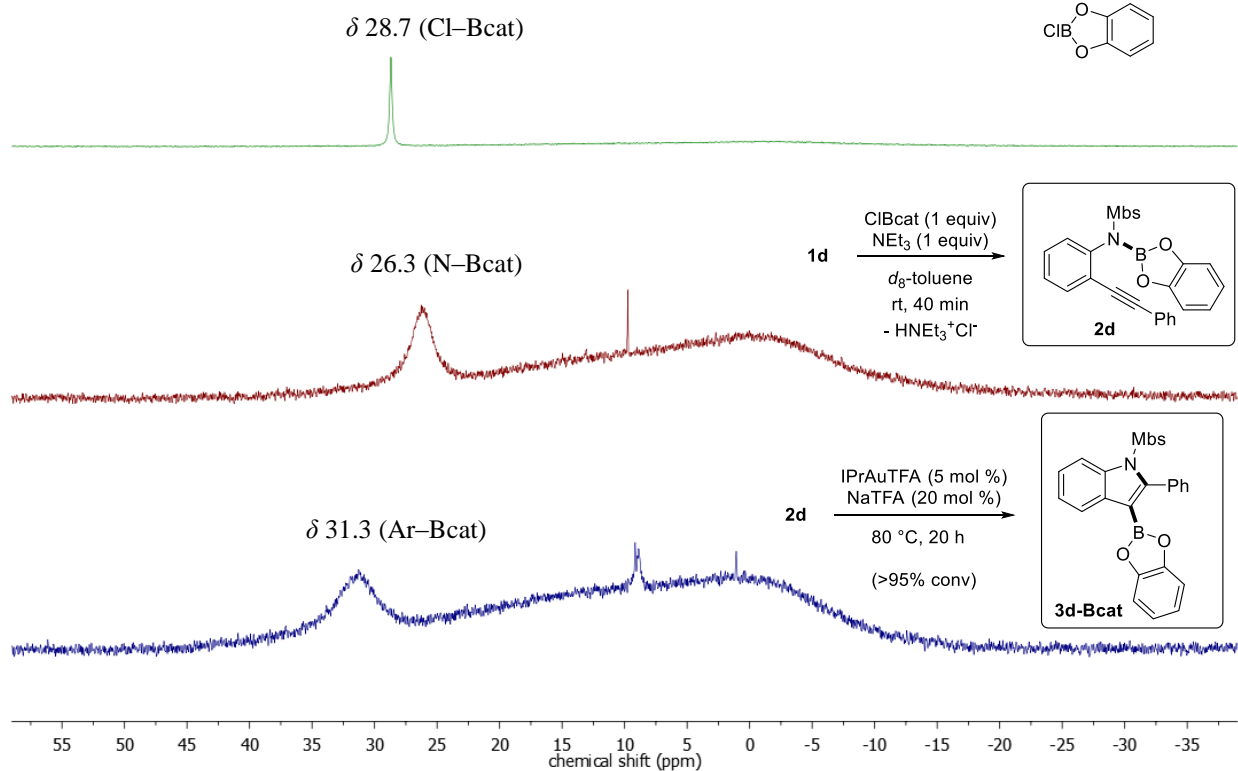



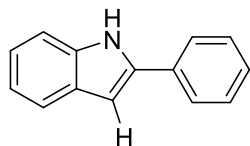

**2-Phenyl-1H-indole (3a-H).** Following the general procedure from HBcat (50 °C, 2 h for B–N bond formation step; 50 °C, 15.5 h for cyclization step), purification by flash column chromatography (elution gradient from 10-30% CH<sub>2</sub>Cl<sub>2</sub> in hexanes) gave the title compound as a white solid (13.4 mg, 69% yield).

**<sup>1</sup>H NMR** (600 MHz, CDCl<sub>3</sub>): δ 8.33 (br s, 1H), 7.68 (d, *J* = 7.5 Hz, 2H), 7.64 (d, *J* = 7.9 Hz, 1H), 7.45 (t, *J* = 7.7 Hz, 2H), 7.41 (d, *J* = 8.1 Hz, 1H), 7.33 (t, *J* = 7.4 Hz, 1H), 7.20 (t, *J* = 7.6 Hz, 1H), 7.13 (t, *J* = 7.5 Hz, 1H), 6.84 (s, 1H). This spectrum is in agreement with literature spectral data.<sup>11</sup>

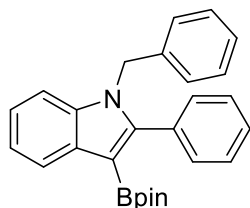

**1-Benzyl-2-phenyl-3-(4,4,5,5-tetramethyl-1,3,2-dioxaborolan-2-yl)-1H-indole (3b).** Following the general procedure from HBcat (110 °C, 38 h for B–N bond formation step; 110 °C, 17 h for cyclization step), purification by flash column chromatography (elution gradient from 10-50% CH<sub>2</sub>Cl<sub>2</sub> in hexanes) gave the title compound as a colorless oil (22.6 mg, 55% yield).

**<sup>1</sup>H NMR** (500 MHz, CDCl<sub>3</sub>): δ 8.13 (d, *J* = 7.8 Hz, 1H), 7.43-7.33 (m, 5H), 7.27-7.14 (m, 6H), 6.98 (d, *J* = 6.9 Hz, 2H), 5.28 (s, 2H), 1.27 (s, 12H). **<sup>13</sup>C NMR** (125 MHz, CDCl<sub>3</sub>): δ 150.3, 138.02, 137.99, 133.0, 132.6, 131.0, 128.7, 128.4, 127.7, 127.2, 126.2, 122.5, 122.1, 120.9, 110.5, 82.6, 47.8, 24.9. **<sup>11</sup>B NMR** (193 MHz, CDCl<sub>3</sub>): δ 30.4. **HRMS** (ESI): *m/z* calcd for C<sub>27</sub>H<sub>28</sub>BNO<sub>2</sub>Na [M+Na]<sup>+</sup>: 432.2116. Found: 432.2113.

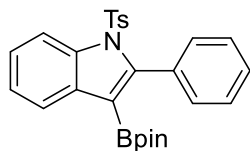

**2-Phenyl-3-(4,4,5,5-tetramethyl-1,3,2-dioxaborolan-2-yl)-1-tosyl-1H-indole (3c).** Following the general procedure from HBcat (110 °C, 20 h for B–N bond formation step; 80 °C, 20 h for cyclization step), purification by flash column chromatography (elution gradient from 10-50% CH<sub>2</sub>Cl<sub>2</sub> in hexanes) gave the title compound as a white solid (30.4 mg, 64% yield, average of two runs).

**<sup>1</sup>H NMR** (600 MHz, CDCl<sub>3</sub>): δ 8.30 (d, *J* = 8.3 Hz, 1H), 7.86 (d, *J* = 7.7 Hz, 1H), 7.44-7.40 (m, 1H), 7.38-7.27 (m, 8H), 7.06 (d, *J* = 8.2 Hz, 2H), 2.30 (s, 3H), 1.16 (s, 12H). **<sup>13</sup>C NMR** (150 MHz, CDCl<sub>3</sub>): δ

148.9, 144.7, 137.8, 135.9, 133.5, 132.4, 131.8, 129.5, 128.8, 127.0, 126.7, 124.7, 124.1, 122.3, 115.7, 83.4, 24.7, 21.7.  $^{11}\text{B}$  NMR (193 MHz,  $\text{CDCl}_3$ ):  $\delta$  29.8. These spectra are in agreement with literature spectral data.<sup>12</sup>

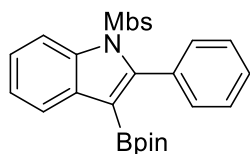

**1-((4-Methoxyphenyl)sulfonyl)-2-phenyl-3-(4,4,5,5-tetramethyl-1,3,2-dioxaborolan-2-yl)-1H-indole (3d).** Following the general procedure from HBcat (110 °C, 20 h for B–N bond formation step; 80 °C, 20 h for cyclization step), purification by flash column chromatography (elution gradient from 10-50%  $\text{CH}_2\text{Cl}_2$  in hexanes) gave the title compound as a white solid (32.4 mg, 66% yield). Following the general procedure from ClBcat, purification by flash column chromatography (elution gradient from 10-50%  $\text{CH}_2\text{Cl}_2$  in hexanes) gave the title compound as a white solid (78.2 mg, 80% yield).

$^1\text{H}$  NMR (500 MHz,  $\text{CDCl}_3$ ):  $\delta$  8.31 (d,  $J = 8.4$  Hz, 1H), 7.87 (d,  $J = 7.7$  Hz, 1H), 7.46-7.40 (m, 1H), 7.38-7.32 (m, 7H), 7.29 (t,  $J = 7.5$  Hz, 1H), 6.71 (d,  $J = 9.0$  Hz, 2H), 3.76 (s, 3H), 1.16 (s, 12H).  $^{13}\text{C}$  NMR (125 MHz,  $\text{CDCl}_3$ ):  $\delta$  163.7, 148.8, 137.8, 133.5, 132.4, 131.8, 130.4, 129.2, 128.7, 126.7, 124.7, 124.1, 122.3, 115.7, 114.0, 83.4, 55.7, 24.7.  $^{11}\text{B}$  NMR (193 MHz,  $\text{CDCl}_3$ ):  $\delta$  30.1. These spectra are in agreement with literature spectral data.<sup>12</sup>

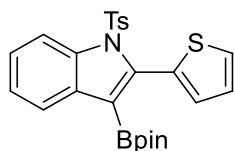

**3-(4,4,5,5-Tetramethyl-1,3,2-dioxaborolan-2-yl)-2-(thiophen-2-yl)-1-tosyl-1H-indole (3e).** Following the general procedure from ClBcat, purification by flash column chromatography (elution gradient from 10-50%  $\text{CH}_2\text{Cl}_2$  in hexanes) gave the title compound as a pale yellow solid (68.1 mg, 71% yield).

$^1\text{H}$  NMR (500 MHz,  $\text{CDCl}_3$ ):  $\delta$  8.30 (d,  $J = 8.4$  Hz, 1H), 7.86 (d,  $J = 7.7$  Hz, 1H), 7.45-7.34 (m, 4H), 7.29 (t,  $J = 7.5$  Hz, 1H), 7.14-7.04 (m, 4H), 2.32 (s, 3H), 1.20 (s, 12H).  $^{13}\text{C}$  NMR (125 MHz,  $\text{CDCl}_3$ ):  $\delta$  144.8, 140.0, 138.0, 135.9, 132.9, 132.0, 131.8, 129.6, 127.8, 127.1, 126.0, 125.2, 124.0, 122.4, 115.4, 83.5, 24.8, 21.7.  $^{11}\text{B}$  NMR (193 MHz,  $\text{CDCl}_3$ ):  $\delta$  29.9. HRMS (ESI):  $m/z$  calcd for  $\text{C}_{25}\text{H}_{26}\text{BNO}_4\text{S}_2\text{Na}$   $[\text{M}+\text{Na}]^+$ : 501.1330. Found: 501.1336.

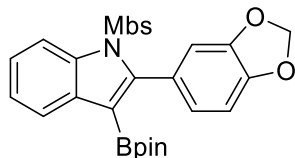

**2-(Benzo[d][1,3]dioxol-5-yl)-1-((4-methoxyphenyl)sulfonyl)-3-(4,4,5,5-tetramethyl-1,3,2-dioxaborolan-2-yl)-1H-indole (3f).** Following the general procedure from ClBcat, purification by flash column chromatography (elution gradient from 10-60% CH<sub>2</sub>Cl<sub>2</sub> in hexanes) gave the title compound as a white solid (83.4 mg, 78% yield).

<sup>1</sup>H NMR (500 MHz, CDCl<sub>3</sub>): δ 8.29 (d, *J* = 8.3 Hz, 1H), 7.85 (d, *J* = 7.7 Hz, 1H), 7.39 (d, *J* = 9.0 Hz, 2H), 7.34 (t, *J* = 7.2 Hz, 1H), 7.28 (t, *J* = 7.3 Hz, 1H), 6.89 (s, 1H), 6.80 (s, 2H), 6.73 (d, *J* = 8.9 Hz, 2H), 6.04 (s, 2H), 3.76 (s, 3H), 1.20 (s, 12H). <sup>13</sup>C NMR (125 MHz, CDCl<sub>3</sub>): δ 163.7, 148.5, 148.2, 146.3, 137.8, 133.5, 130.2, 129.2, 126.0, 125.8, 124.7, 124.1, 122.2, 115.8, 114.0, 112.5, 106.8, 101.3, 83.4, 55.7, 24.8. <sup>11</sup>B NMR (193 MHz, CDCl<sub>3</sub>): δ 30.1. HRMS (ESI): *m/z* calcd for C<sub>28</sub>H<sub>28</sub>BNO<sub>7</sub>SNa [M+Na]<sup>+</sup>: 556.1583. Found: 556.1568.

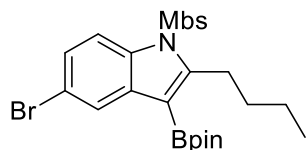

**5-Bromo-2-butyl-1-((4-methoxyphenyl)sulfonyl)-3-(4,4,5,5-tetramethyl-1,3,2-dioxaborolan-2-yl)-1H-indole (3g).** Following the general procedure from ClBcat, purification by flash column chromatography (elution gradient from 10-20% CH<sub>2</sub>Cl<sub>2</sub> in hexanes) gave the title compound as a white solid (87.0 mg, 79% yield).

<sup>1</sup>H NMR (500 MHz, CDCl<sub>3</sub>): δ 8.05 (d, *J* = 1.9 Hz, 1H), 8.01 (d, *J* = 8.9 Hz, 1H), 7.70-7.65 (m, 2H), 7.33 (dd, *J* = 8.9, 2.1 Hz, 1H), 6.87-6.81 (m, 2H), 3.78 (s, 3H), 3.28 (t, *J* = 7.7 Hz, 2H), 1.68 (pentet, *J* = 7.6 Hz, 2H), 1.43 (sextet, *J* = 7.4 Hz, 2H), 1.34 (s, 12H), 0.95 (t, *J* = 7.4 Hz, 3H). <sup>13</sup>C NMR (125 MHz, CDCl<sub>3</sub>): δ 163.8, 154.3, 136.0, 135.4, 130.7, 128.7, 126.5, 124.8, 117.2, 116.0, 114.6, 83.4, 55.8, 34.3, 28.2, 25.0, 22.8, 13.9. <sup>11</sup>B NMR (193 MHz, CDCl<sub>3</sub>): δ 30.1. HRMS (ESI): *m/z* calcd for C<sub>25</sub>H<sub>31</sub>BBrNO<sub>5</sub>SNa [M+Na]<sup>+</sup>: 570.1102. Found: 570.1103.

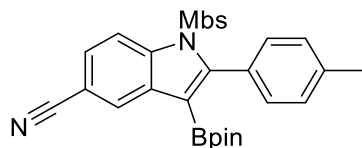

**1-((4-Methoxyphenyl)sulfonyl)-3-(4,4,5,5-tetramethyl-1,3,2-dioxaborolan-2-yl)-2-(*p*-tolyl)-1*H*-indole-5-carbonitrile (3h).** Following the general procedure from ClBcat, purification by flash column chromatography (elution gradient from 10-50% CH<sub>2</sub>Cl<sub>2</sub> in hexanes) gave the title compound as a white solid (69.0 mg, 65% yield).

<sup>1</sup>H NMR (500 MHz, CDCl<sub>3</sub>): δ 8.40 (dd, *J* = 8.7, 0.5 Hz, 1H), 8.25 (dd, *J* = 1.7, 0.5 Hz, 1H), 7.59 (dd, *J* = 8.7, 1.7 Hz, 1H), 7.33-7.28 (m, 2H), 7.20-7.14 (m, 4H), 6.76-6.71 (m, 2H), 3.79 (s, 3H), 2.45 (s, 3H), 1.17 (s, 12H). <sup>13</sup>C NMR (125 MHz, CDCl<sub>3</sub>): δ 164.1, 151.3, 139.6, 139.2, 133.5, 131.7, 129.9, 129.4, 128.2, 127.54, 127.47, 127.4, 120.0, 116.3, 114.2, 107.3, 83.7, 55.8, 24.7, 21.7. <sup>11</sup>B NMR (193 MHz, CDCl<sub>3</sub>): δ 29.5. HRMS (ESI): *m/z* calcd for C<sub>29</sub>H<sub>29</sub>BN<sub>2</sub>O<sub>5</sub>SNa [M+Na]<sup>+</sup>: 551.1793. Found: 551.1804.

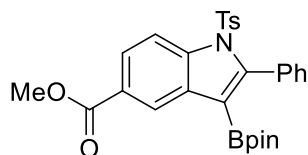

**Methyl 2-phenyl-3-(4,4,5,5-tetramethyl-1,3,2-dioxaborolan-2-yl)-1-tosyl-1*H*-indole-5-carboxylate (3i).** Following the general procedure from ClBcat, purification by flash column chromatography (elution gradient from 10-60% CH<sub>2</sub>Cl<sub>2</sub> in hexanes) gave the title compound as a white solid (73.1 mg, 69% yield).

<sup>1</sup>H NMR (500 MHz, CDCl<sub>3</sub>): δ 8.55 (d, *J* = 1.4 Hz, 1H), 8.36 (d, *J* = 8.8 Hz, 1H), 8.05 (dd, *J* = 8.8, 1.7 Hz, 1H), 7.47-7.41 (m, 1H), 7.38-7.27 (m, 6H), 7.06 (d, *J* = 8.2 Hz, 2H), 3.94 (s, 3H), 2.30 (s, 3H), 1.17 (s, 12H). <sup>13</sup>C NMR (125 MHz, CDCl<sub>3</sub>): δ 167.6, 149.9, 145.1, 140.4, 135.5, 133.1, 131.7, 129.6, 129.0, 127.0, 126.7, 126.0, 125.9, 124.5, 115.2, 83.5, 52.2, 24.7, 21.6. <sup>11</sup>B NMR (193 MHz, CDCl<sub>3</sub>): δ 30.2. HRMS (ESI): *m/z* calcd for C<sub>29</sub>H<sub>30</sub>BNO<sub>6</sub>SNa [M+Na]<sup>+</sup>: 554.1790. Found: 554.1789.

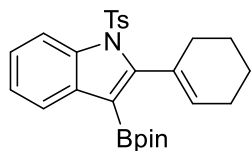

**2-(Cyclohex-1-en-1-yl)-3-(4,4,5,5-tetramethyl-1,3,2-dioxaborolan-2-yl)-1-tosyl-1*H*-indole (3j).** Following the general procedure from ClBcat, purification by flash column chromatography (elution gradient from 10-40% CH<sub>2</sub>Cl<sub>2</sub> in hexanes) gave the title compound as a white solid (70.1 mg, 73% yield).

<sup>1</sup>H NMR (500 MHz, CDCl<sub>3</sub>): δ 8.18 (d, *J* = 8.3 Hz, 1H), 7.81 (d, *J* = 7.6 Hz, 1H), 7.61 (d, *J* = 8.2 Hz, 2H), 7.30-7.20 (m, 2H), 7.12 (d, *J* = 8.2 Hz, 2H), 5.40 (br s, 1H), 2.63 (br s, 2H), 2.31 (s, 3H), 2.15 (br s, 2H), 1.85-1.80 (m, 2H), 1.74 (br s, 2H), 1.29 (s, 12H). <sup>13</sup>C NMR (125 MHz, CDCl<sub>3</sub>): δ 152.1, 144.6, 137.2,

136.3, 133.5, 132.2, 130.5, 129.5, 127.0, 124.2, 123.7, 122.2, 114.9, 83.2, 31.0, 25.9, 25.0, 22.9, 22.0, 21.7.  $^{11}\text{B}$  NMR (193 MHz,  $\text{CDCl}_3$ ):  $\delta$  30.6. HRMS (ESI):  $m/z$  calcd for  $\text{C}_{27}\text{H}_{32}\text{BNO}_4\text{SNa}$   $[\text{M}+\text{Na}]^+$ : 500.2048. Found: 500.2035.

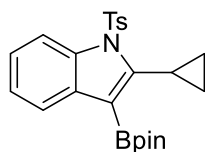

**2-Cyclopropyl-3-(4,4,5,5-tetramethyl-1,3,2-dioxaborolan-2-yl)-1-tosyl-1H-indole (3k).** Following the general procedure from ClBcat, purification by flash column chromatography (elution gradient from 10-50%  $\text{CH}_2\text{Cl}_2$  in hexanes) gave the title compound as a white solid (58.4 mg, 67% yield).

$^1\text{H}$  NMR (500 MHz,  $\text{CDCl}_3$ ):  $\delta$  8.19 (d,  $J = 8.2$  Hz, 1H), 7.84 (d,  $J = 7.8$  Hz, 1H), 7.70 (d,  $J = 8.3$  Hz, 2H), 7.30-7.25 (m, 1H), 7.22 (t,  $J = 7.5$  Hz, 1H), 7.19 (d,  $J = 8.1$  Hz, 2H), 2.35 (s, 3H), 2.32-2.25 (m, 1H), 1.39 (s, 12H), 1.03-0.97 (m, 2H), 0.67-0.62 (m, 2H).  $^{13}\text{C}$  NMR (125 MHz,  $\text{CDCl}_3$ ):  $\delta$  151.0, 144.7, 137.6, 137.1, 132.9, 129.8, 126.7, 124.3, 123.4, 122.0, 114.3, 83.8, 25.1, 21.7, 10.6, 9.4.  $^{11}\text{B}$  NMR (193 MHz,  $\text{CDCl}_3$ ):  $\delta$  30.8. HRMS (ESI):  $m/z$  calcd for  $\text{C}_{24}\text{H}_{28}\text{BNO}_4\text{SNa}$   $[\text{M}+\text{Na}]^+$ : 460.1734. Found: 460.1736.

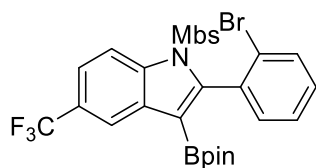

**2-(2-Bromophenyl)-1-((4-methoxyphenyl)sulfonyl)-3-(4,4,5,5-tetramethyl-1,3,2-dioxaborolan-2-yl)-5-(trifluoromethyl)-1H-indole (3l).** Following the general procedure from ClBcat (cyclization temperature 110  $^\circ\text{C}$ ), purification by flash column chromatography (elution gradient from 10-40%  $\text{CH}_2\text{Cl}_2$  in hexanes) gave the title compound as a white solid (76.3 mg, 60% yield).

$^1\text{H}$  NMR (500 MHz,  $\text{CDCl}_3$ ):  $\delta$  8.38 (d,  $J = 8.9$  Hz, 1H), 8.25 (s, 1H), 7.61 (dd,  $J = 8.9, 1.7$  Hz, 1H), 7.58 (dd,  $J = 7.6, 1.0$  Hz, 1H), 7.55-7.51 (m, 2H), 7.38-7.27 (m, 3H), 6.83-6.79 (m, 2H), 3.80 (s, 3H), 1.15 (s, 6H), 1.14 (s, 6H).  $^{13}\text{C}$  NMR (125 MHz,  $\text{CDCl}_3$ ):  $\delta$  164.2, 147.9, 138.5, 133.6, 133.4, 132.4, 131.8, 130.5, 130.3, 129.8, 126.2, 126.0 (q,  $J = 32.1$  Hz), 125.9, 125.0 (q,  $J = 262.5$  Hz), 121.5 (q,  $J = 3.4$  Hz), 120.4 (q,  $J = 4.1$  Hz), 115.1, 114.4, 83.4, 55.9, 24.9, 24.6.  $^{11}\text{B}$  NMR (193 MHz,  $\text{CDCl}_3$ ):  $\delta$  29.6. HRMS (ESI):  $m/z$  calcd for  $\text{C}_{28}\text{H}_{26}\text{BBBrF}_3\text{NO}_5\text{SNa}$   $[\text{M}+\text{Na}]^+$ : 658.0663. Found: 658.0672.

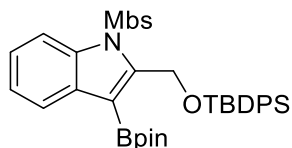

**2-(((*t*-Butyldiphenylsilyl)oxy)methyl)-1-((4-methoxyphenyl)sulfonyl)-3-(4,4,5,5-tetramethyl-1,3,2-dioxaborolan-2-yl)-1*H*-indole (3m).** Following the general procedure from ClBcat (cyclization temperature 110 °C), purification by flash column chromatography (elution gradient from 10-40% CH<sub>2</sub>Cl<sub>2</sub> in hexanes) gave the title compound as a white solid (74.5 mg, 55% yield).

<sup>1</sup>H NMR (600 MHz, CDCl<sub>3</sub>): δ 8.05 (d, *J* = 7.5 Hz, 1H), 7.97 (d, *J* = 8.2 Hz, 1H), 7.92 (d, *J* = 9.0 Hz, 2H), 7.77 (d, *J* = 6.8 Hz, 4H), 7.43-7.39 (m, 2H), 7.35 (t, *J* = 7.4 Hz, 4H), 7.28-7.21 (m, 2H), 6.62 (d, *J* = 9.0 Hz, 2H), 5.51 (s, 2H), 3.70 (s, 3H), 1.15 (s, 12H), 1.13 (s, 9H). <sup>13</sup>C NMR (150 MHz, CDCl<sub>3</sub>): δ 163.5, 148.2, 137.0, 136.1, 134.4, 132.8, 131.0, 129.6, 129.5, 127.6, 124.7, 123.34, 123.32, 114.4, 114.1, 83.4, 58.5, 55.6, 27.3, 24.9, 20.0. <sup>11</sup>B NMR (193 MHz, CDCl<sub>3</sub>): δ 30.1. HRMS (ESI): *m/z* calcd for C<sub>38</sub>H<sub>44</sub>BNO<sub>6</sub>SSiNa [M+Na]<sup>+</sup>: 704.2656. Found: 704.2667.

### Gram-Scale Preparation of 3g (Scheme 1)

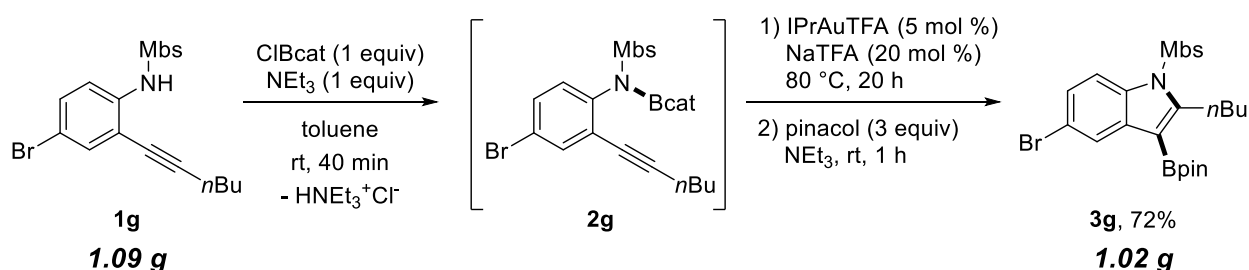

Inside a nitrogen-filled glovebox, to a mixture of **1a** (1.09 g, 2.58 mmol) and ClBcat (0.398 g, 2.58 mmol) in toluene (6 mL) in a 20 mL vial, NEt<sub>3</sub> (360 μL, 2.58 mmol) was added using a gastight syringe. The vial was sealed with a cap and stirred for 40 min at room temperature, during which HNEt<sub>3</sub>Cl salt was formed. The resulting slurry was filtered through a plug of Celite, and additional toluene (3 × 1 mL) rinses were used to ensure full transfer. The filtrate was mixed with IPrAuTFA (90.1 mg, 0.129 mmol) and NaTFA (70.2 mg, 0.516 mmol) and transferred to a 25 mL Schlenk tube, containing a magnetic stir bar, with toluene (2 × 2 mL) rinses to aid the transfer to make a total reaction volume of 13 mL. The Schlenk tube was sealed with a Teflon cap and heated to the 80 °C for 20 h outside the glovebox. The reaction was allowed to cool to room temperature and brought into a glovebox. A solution of pinacol (0.915 g, 7.74 mmol) in NEt<sub>3</sub> (5.4 mL, 39 mmol) was added to the Schlenk tube and stirred for 1 h outside the glovebox. The resulting mixture was concentrated in vacuo and purified by flash chromatography (elution gradient from 10-30% CH<sub>2</sub>Cl<sub>2</sub> in hexanes) to give the title compound as a white solid (1.02 g, 72% yield). Spectral data were identical to those previously obtained for this compound (see page S19). Single crystals suitable for X-ray crystallography were grown in hexanes by storing at 3 °C in a fridge overnight.

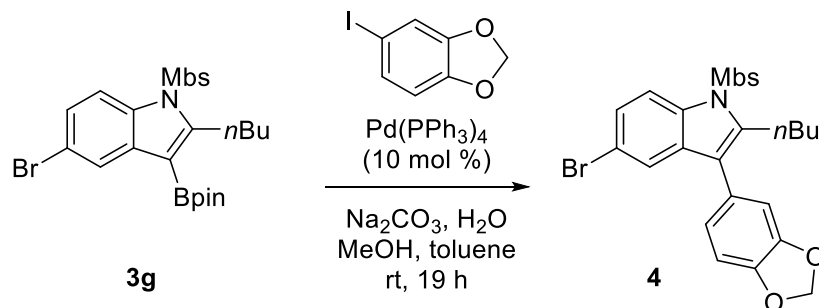

**3-(Benzo[*d*][1,3]dioxol-5-yl)-5-bromo-2-butyl-1-((4-methoxyphenyl)sulfonyl)-1*H*-indole (4).** The Suzuki cross-coupling reaction was adapted from a literature procedure.<sup>13</sup> A mixture of **3g** (82.2 mg, 0.150 mmol), 1-iodo-3,4-methylenedioxybenzene (44.6 mg, 0.180 mmol),  $\text{Na}_2\text{CO}_3$  aq (0.25 mL, 2M, 0.50 mmol), toluene/MeOH (4 mL:1 mL) in a 10 mL round bottom flask, sealed with a septa, was deoxygenated by bubbling a stream of  $\text{N}_2$  into the reaction mixture for 5 min. To this reaction mixture,  $\text{Pd(PPh}_3)_4$  (17.3 mg, 0.0150 mmol) was added, and the system was further purged with  $\text{N}_2$ . The reaction mixture was stirred for 19 h at room temperature. Then the reaction was quenched with the addition of  $\text{MgSO}_4$  (500 mg), stirred for 15 min, and filtered through a Celite plug. The filtrate was concentrated in vacuo and purified by flash chromatography (elution gradient from 10-30%  $\text{CH}_2\text{Cl}_2$  in hexanes) to give the title compound as an off-white solid (70.5 mg, 87% yield).

**$^1\text{H NMR}$**  (600 MHz,  $\text{CDCl}_3$ ):  $\delta$  8.08 (d,  $J = 8.8$  Hz, 1H), 7.67-7.63 (m, 2H), 7.40 (d,  $J = 1.9$  Hz, 1H), 7.37 (dd,  $J = 8.8, 2.0$  Hz, 1H), 6.90 (d,  $J = 7.8$  Hz, 1H), 6.87-6.83 (m, 2H), 6.75-6.71 (m, 2H), 6.03 (s, 2H), 3.80 (s, 3H), 2.95 (t,  $J = 7.8$  Hz, 2H), 1.71-1.64 (m, 2H), 1.32-1.24 (m, 2H), 0.84 (t,  $J = 7.4$  Hz, 3H).  **$^{13}\text{C NMR}$**  (150 MHz,  $\text{CDCl}_3$ ):  $\delta$  163.8, 148.0, 147.3, 140.1, 135.4, 132.8, 130.3, 128.7, 127.2, 126.3, 123.6, 122.8, 122.1, 117.4, 116.9, 114.5, 110.3, 108.8, 101.4, 55.8, 33.4, 26.8, 22.7, 13.8. **HRMS** (ESI):  $m/z$  calcd for  $\text{C}_{26}\text{H}_{24}\text{BrNO}_5\text{SNa}$   $[\text{M}+\text{Na}]^+$ : 564.0457. Found: 564.044.

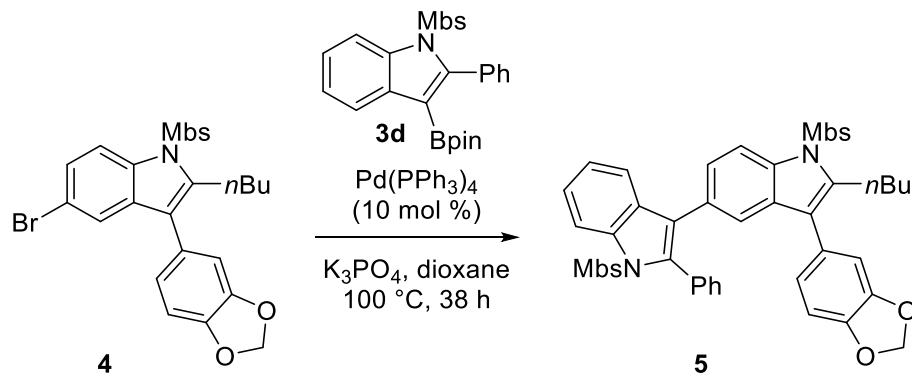

**3'-(Benzo[*d*][1,3]dioxol-5-yl)-2'-butyl-1,1'-bis((4-methoxyphenyl)sulfonyl)-2-phenyl-1*H*,1'*H*-3,5'-biindole (5).** The Suzuki cross-coupling reaction was adapted from a literature procedure.<sup>14</sup> A Schlenk tube was charged with **4** (43.4 mg, 0.0800 mmol), **3d** (50.9 mg, 0.104 mmol), Pd(PPh<sub>3</sub>)<sub>4</sub> (9.2 mg, 0.0080 mmol), K<sub>3</sub>PO<sub>4</sub> (50.9 mg, 0.240 mmol) and dioxane (2 mL) and degassed by three cycles of freeze-pump-thaw. Then the Schlenk tube was placed under N<sub>2</sub> atmosphere, sealed, and heated to 100 °C for 38 h. For workup, the reaction mixture was diluted with EtOAc (10 mL) and washed with water and brine (3 mL each). The organic layer was dried over MgSO<sub>4</sub>, filtered, and concentrated in vacuo. Purification by flash chromatography (elution gradient from 30-50% CH<sub>2</sub>Cl<sub>2</sub> in hexanes) gave the title compound as a white solid (30.9 mg, 47% yield).

**<sup>1</sup>H NMR** (600 MHz, CDCl<sub>3</sub>): δ 8.40 (d, *J* = 8.4 Hz, 1H), 8.08 (d, *J* = 8.7 Hz, 1H), 7.68-7.63 (m, 2H), 7.50 (d, *J* = 7.8 Hz, 1H), 7.42-7.36 (m, 4H), 7.31-7.26 (m, 3H), 7.23-7.20 (m, 2H), 7.12 (dd, *J* = 8.7, 1.7 Hz, 1H), 6.96 (d, *J* = 1.4 Hz, 1H), 6.87-6.83 (m, 2H), 6.79 (d, *J* = 7.8 Hz, 1H), 6.75-6.71 (m, 2H), 6.48 (d, *J* = 1.4 Hz, 1H), 6.46 (dd, *J* = 7.9, 1.6 Hz, 1H), 6.00 (s, 2H), 3.81 (s, 3H), 3.76 (s, 3H), 2.93 (t, *J* = 7.8 Hz, 2H), 1.68-1.61 (m, 2H), 1.29-1.23 (m, 2H), 0.83 (t, *J* = 7.4 Hz, 3H). **<sup>13</sup>C NMR** (150 MHz, CDCl<sub>3</sub>): δ 163.7, 147.8, 147.0, 138.9, 137.3, 136.9, 135.5, 132.4, 131.3, 130.8, 130.6, 130.4, 130.2, 129.3, 128.7, 128.6, 128.2, 127.5, 126.6, 126.1, 125.2, 124.6, 124.2, 123.4, 123.3, 120.9, 120.1, 116.2, 115.1, 114.4, 114.0, 110.2, 108.6, 101.2, 55.74, 55.69, 33.4, 26.7, 22.7, 13.8. **HRMS** (ESI): *m/z* calcd for C<sub>47</sub>H<sub>40</sub>N<sub>2</sub>O<sub>8</sub>S<sub>2</sub>Na [M+Na]<sup>+</sup>: 847.2124. Found: 847.2117.



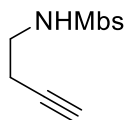

***N*-(But-3-yn-1-yl)-4-methoxybenzenesulfonamide (6).** To a cooled solution of 3-butynylamine (0.600 mL, 7.33 mmol) in pyridine (6 mL) at 0 °C, MbsCl (1.67 g, 8.06 mmol) was added and stirred at room temperature for 24 h. The resulting reaction mixture was diluted with CH<sub>2</sub>Cl<sub>2</sub> (50 mL) and washed sequentially with 1M HCl (50 mL), saturated NaHCO<sub>3</sub> solution, and brine. Then the organic layer was dried over MgSO<sub>4</sub>, filtered, and concentrated in vacuo. Purification by flash column chromatography (30% EtOAc in hexanes) gave the title compound as a white solid (1.35 g, 77% yield).

<sup>1</sup>H NMR (500 MHz, CDCl<sub>3</sub>): δ 7.83-7.78 (m, 2H), 7.01-6.96 (m, 2H), 4.79 (br t, *J* = 5.9 Hz, 1H), 3.87 (s, 3H), 3.10 (q, *J* = 6.5 Hz, 2H), 2.35 (td, *J* = 6.5, 2.6 Hz, 2H), 2.00 (t, *J* = 2.6 Hz, 1H). <sup>13</sup>C NMR (125 MHz, CDCl<sub>3</sub>): δ 163.1, 131.6, 129.4, 114.5, 80.5, 71.1, 55.8, 41.7, 19.9. HRMS (ESI): *m/z* calcd for C<sub>11</sub>H<sub>13</sub>NO<sub>3</sub>SNa [M+Na]<sup>+</sup>: 262.0514. Found: 262.0520.

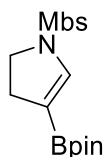

**1-((4-Methoxyphenyl)sulfonyl)-4-(4,4,5,5-tetramethyl-1,3,2-dioxaborolan-2-yl)-2,3-dihydro-1*H*-pyrrole (8a).** Following the general procedure from ClBcat (80 °C, 24 h for cyclization step) and analysis of the crude reaction mixture by <sup>1</sup>H NMR spectroscopy showed that the ratio of **8a:8b**<sup>15</sup> was 56:44. Purification by flash column chromatography (30% CH<sub>2</sub>Cl<sub>2</sub>/5% EtOAc in hexanes) gave the title compound as a white solid (20.1 mg, 27% yield).

<sup>1</sup>H NMR (500 MHz, CDCl<sub>3</sub>): δ 7.75-7.71 (m, 2H), 7.00-6.96 (m, 2H), 6.94 (t, *J* = 1.8 Hz, 1H), 3.86 (s, 3H), 3.50 (t, *J* = 9.2 Hz, 2H), 2.61 (td, *J* = 9.2, 1.8 Hz, 2H), 1.24 (s, 12H). <sup>13</sup>C NMR (125 MHz, CDCl<sub>3</sub>): δ 163.3, 142.4, 129.8, 128.3, 114.5, 83.4, 55.8, 48.3, 31.1, 24.9. <sup>11</sup>B NMR (193 MHz, CDCl<sub>3</sub>): δ 29.5. HRMS (ESI): *m/z* calcd for C<sub>17</sub>H<sub>24</sub>BNO<sub>5</sub>SNa [M+Na]<sup>+</sup>: 388.1369. Found: 388.1362.

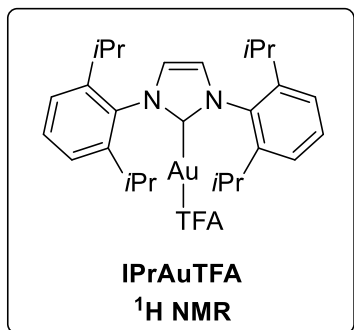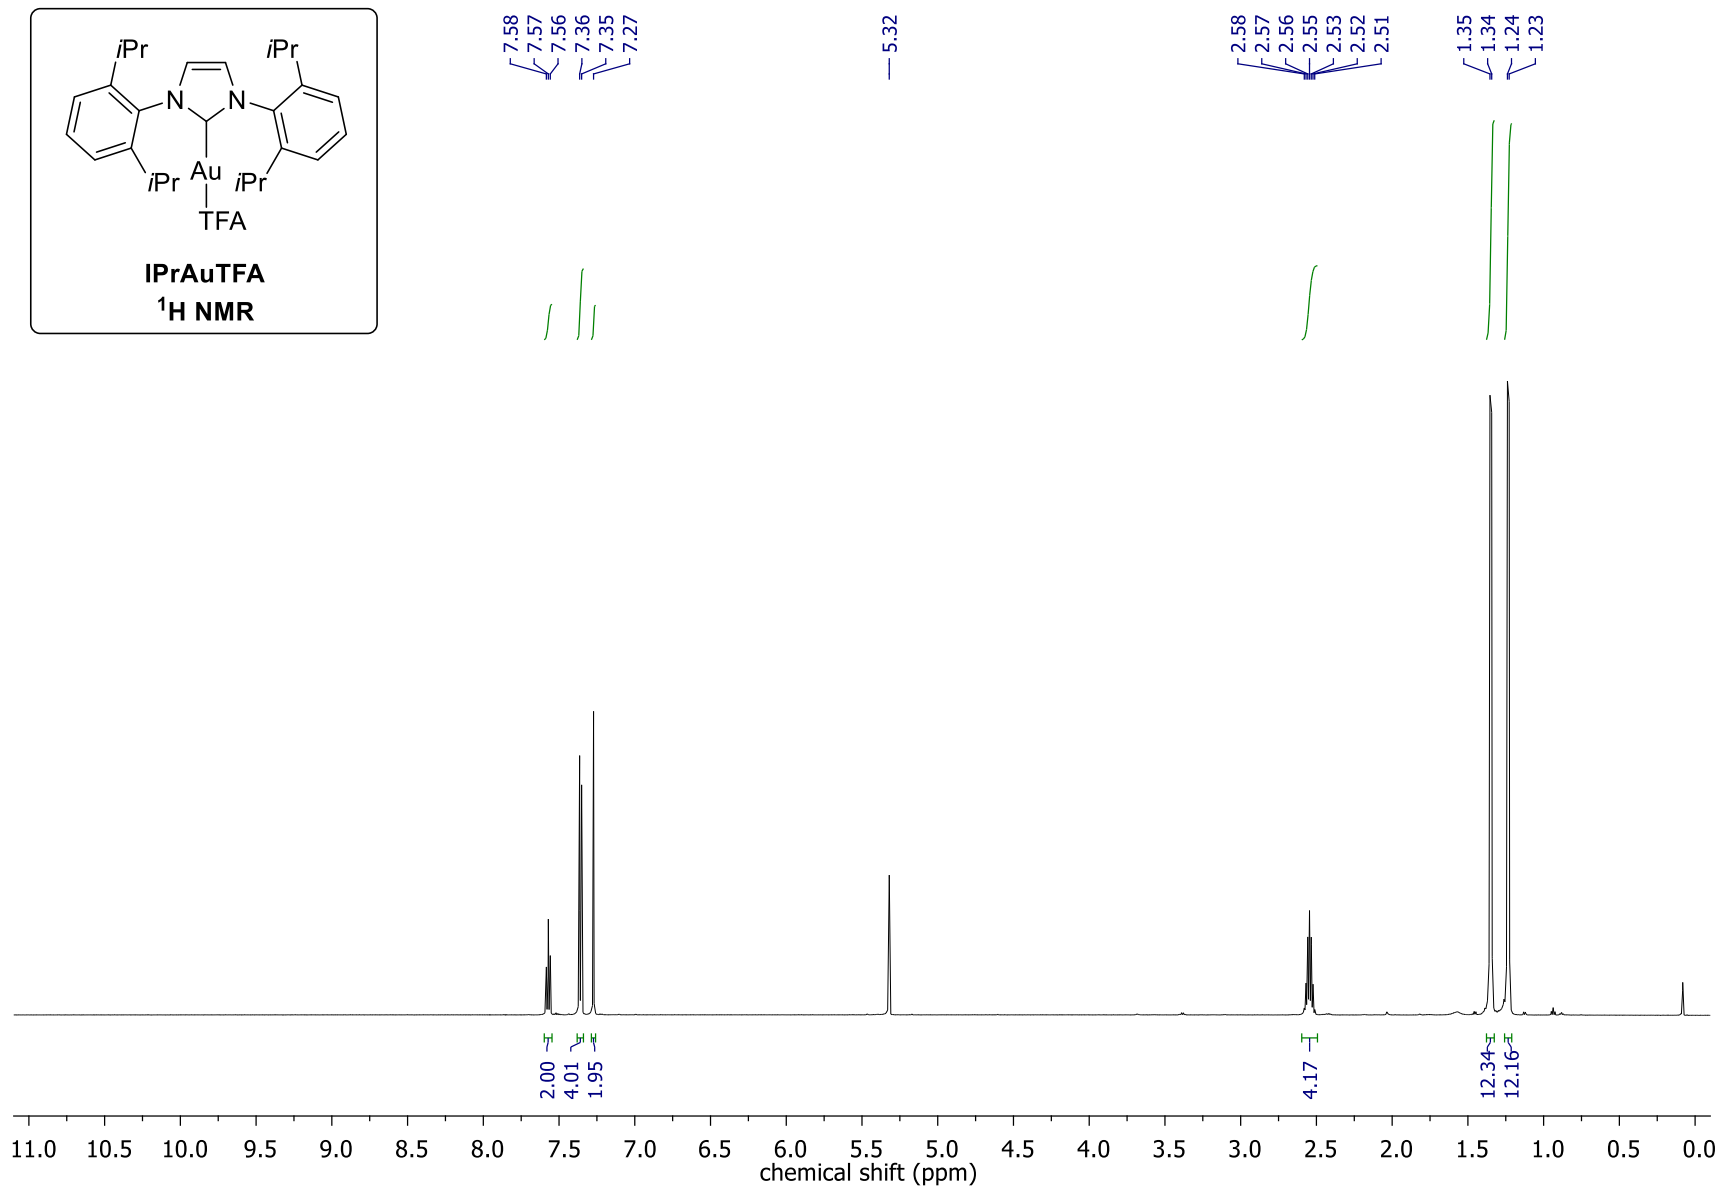

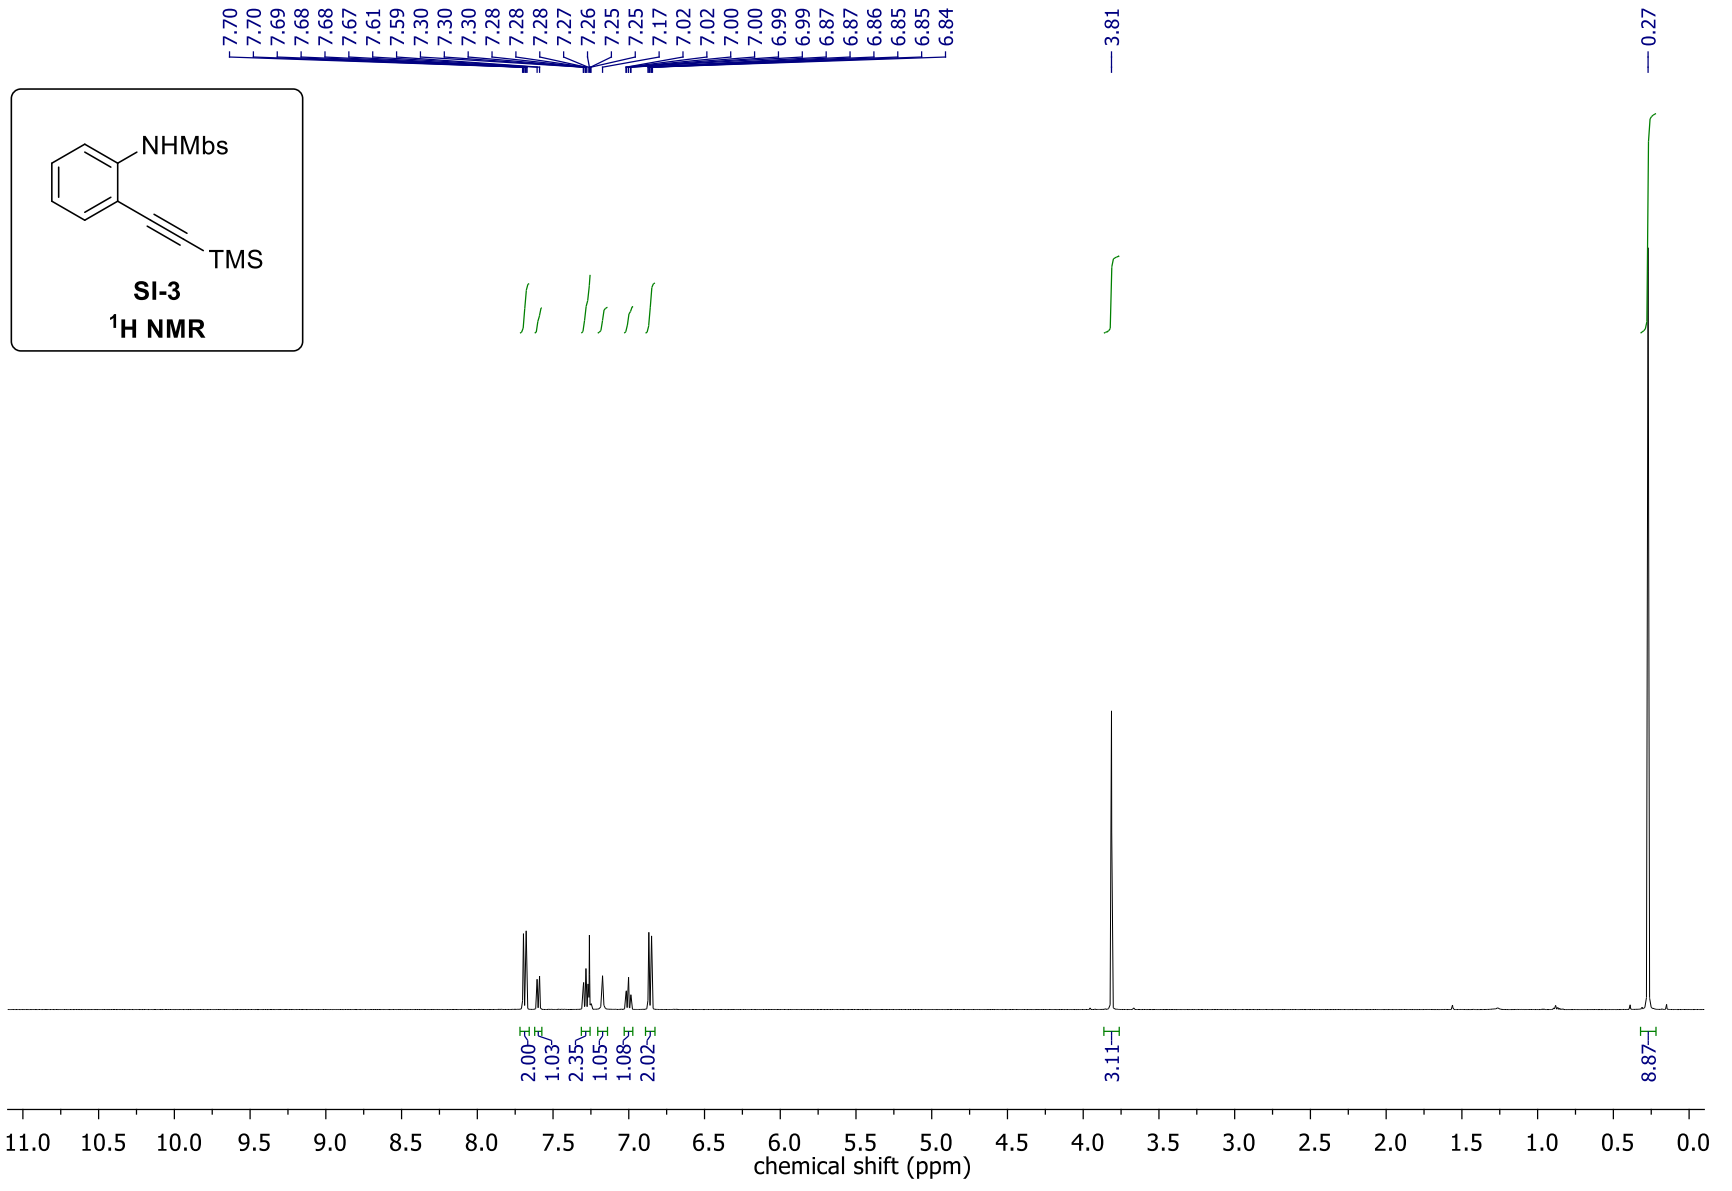

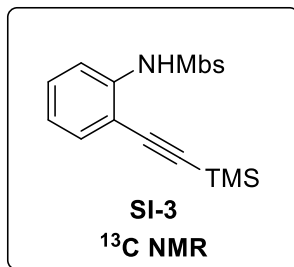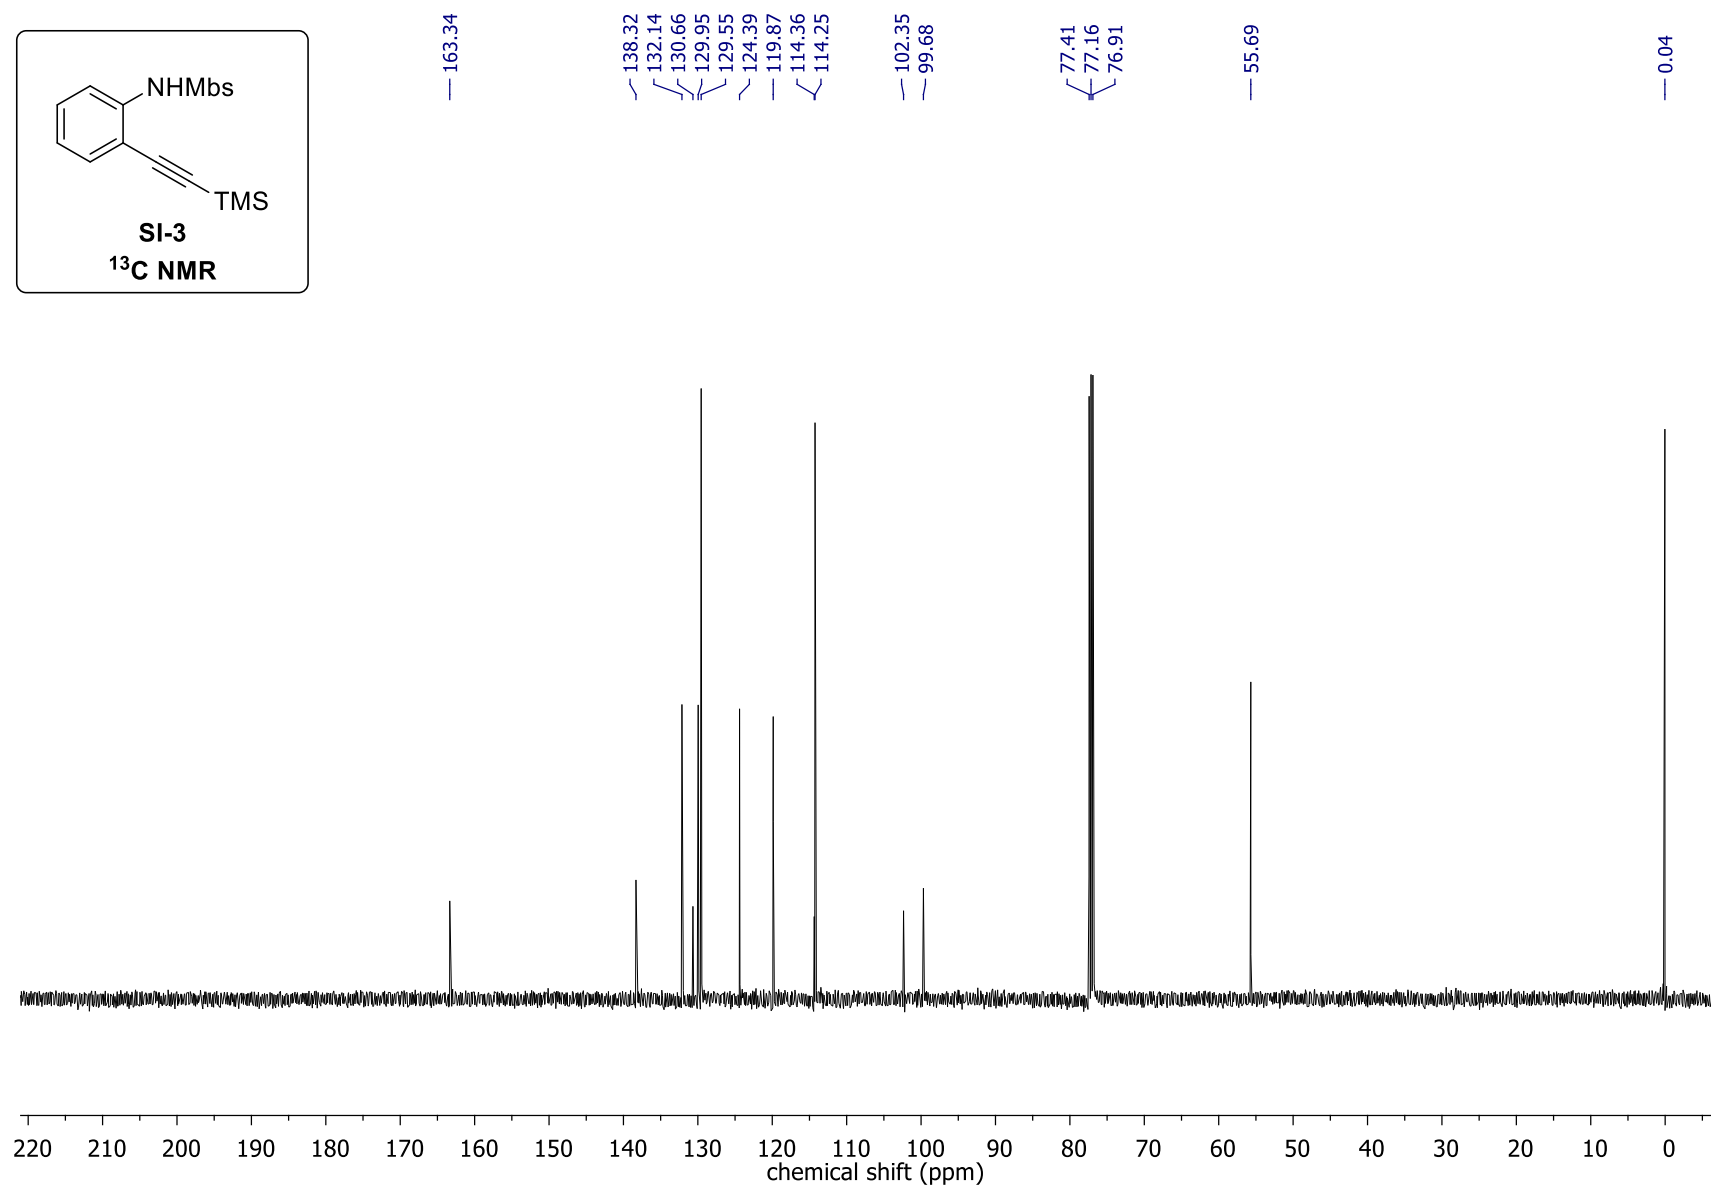

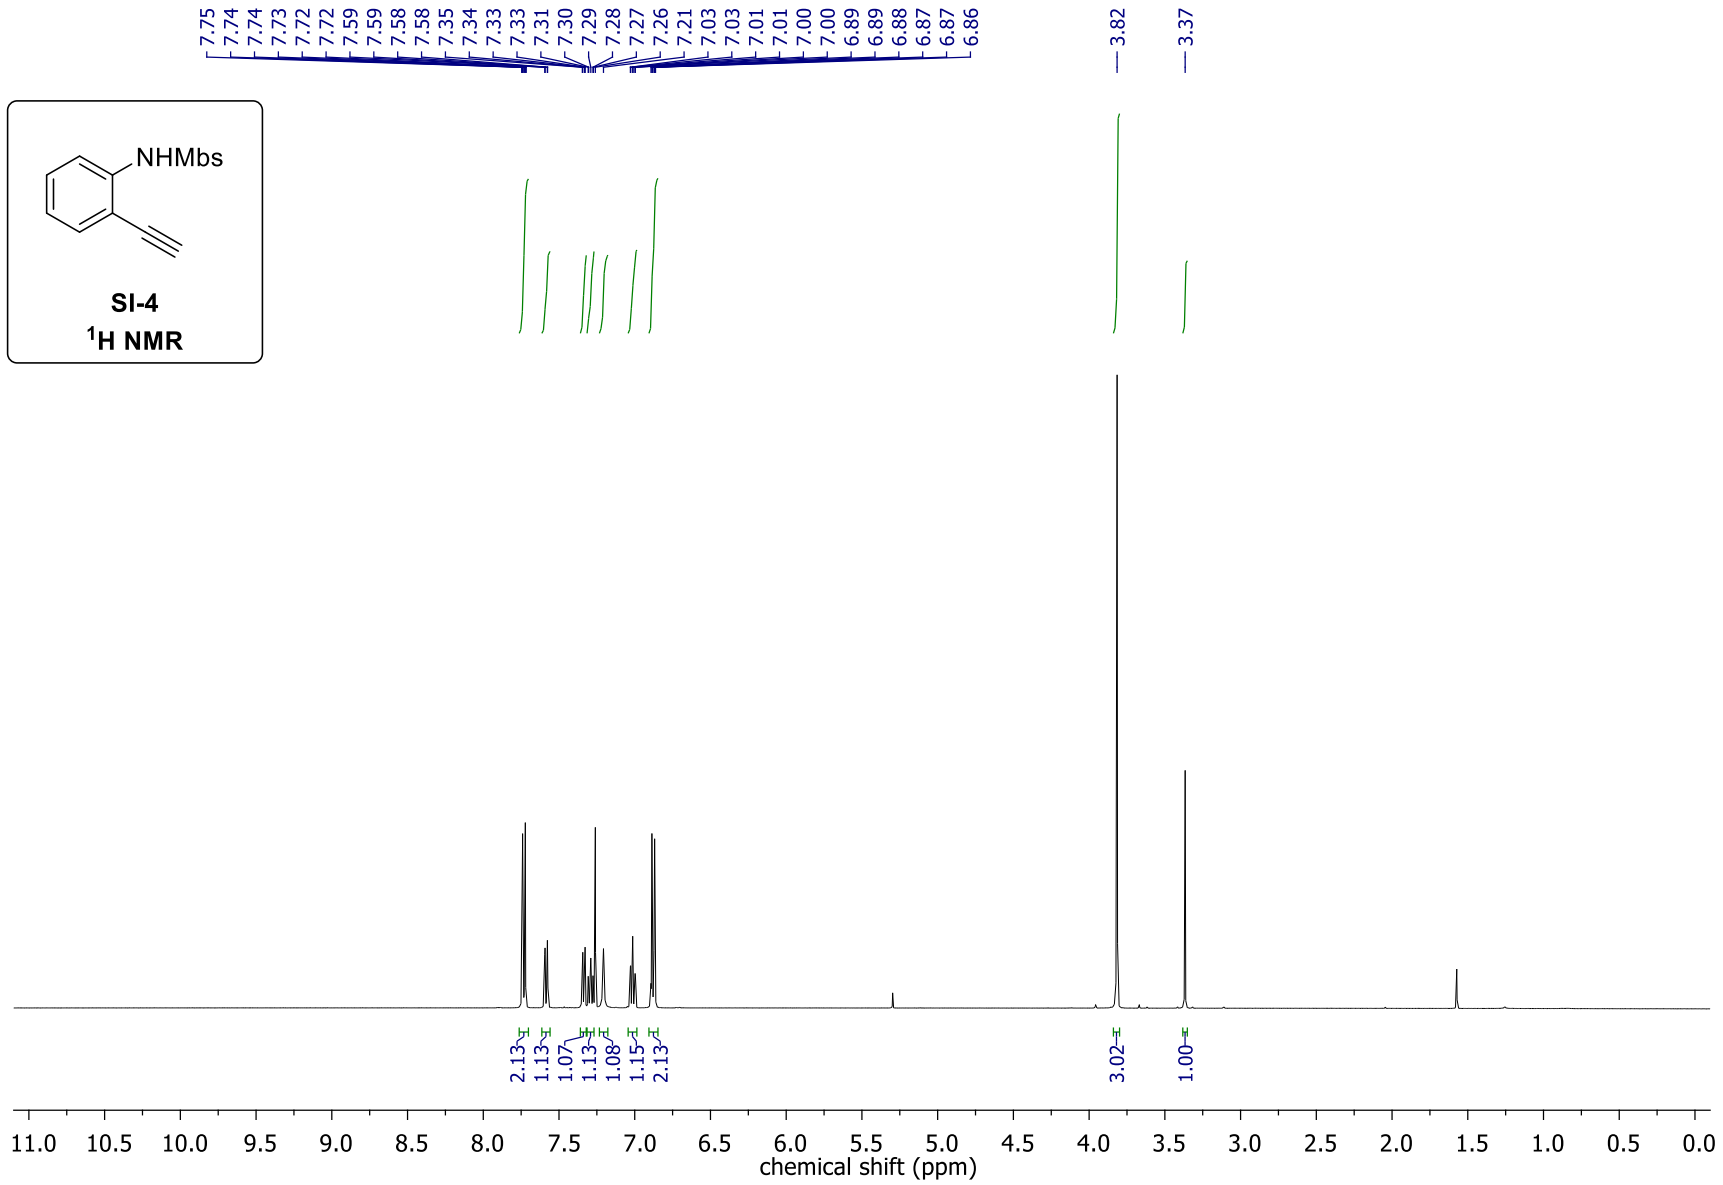

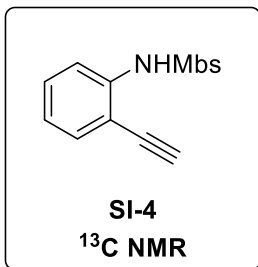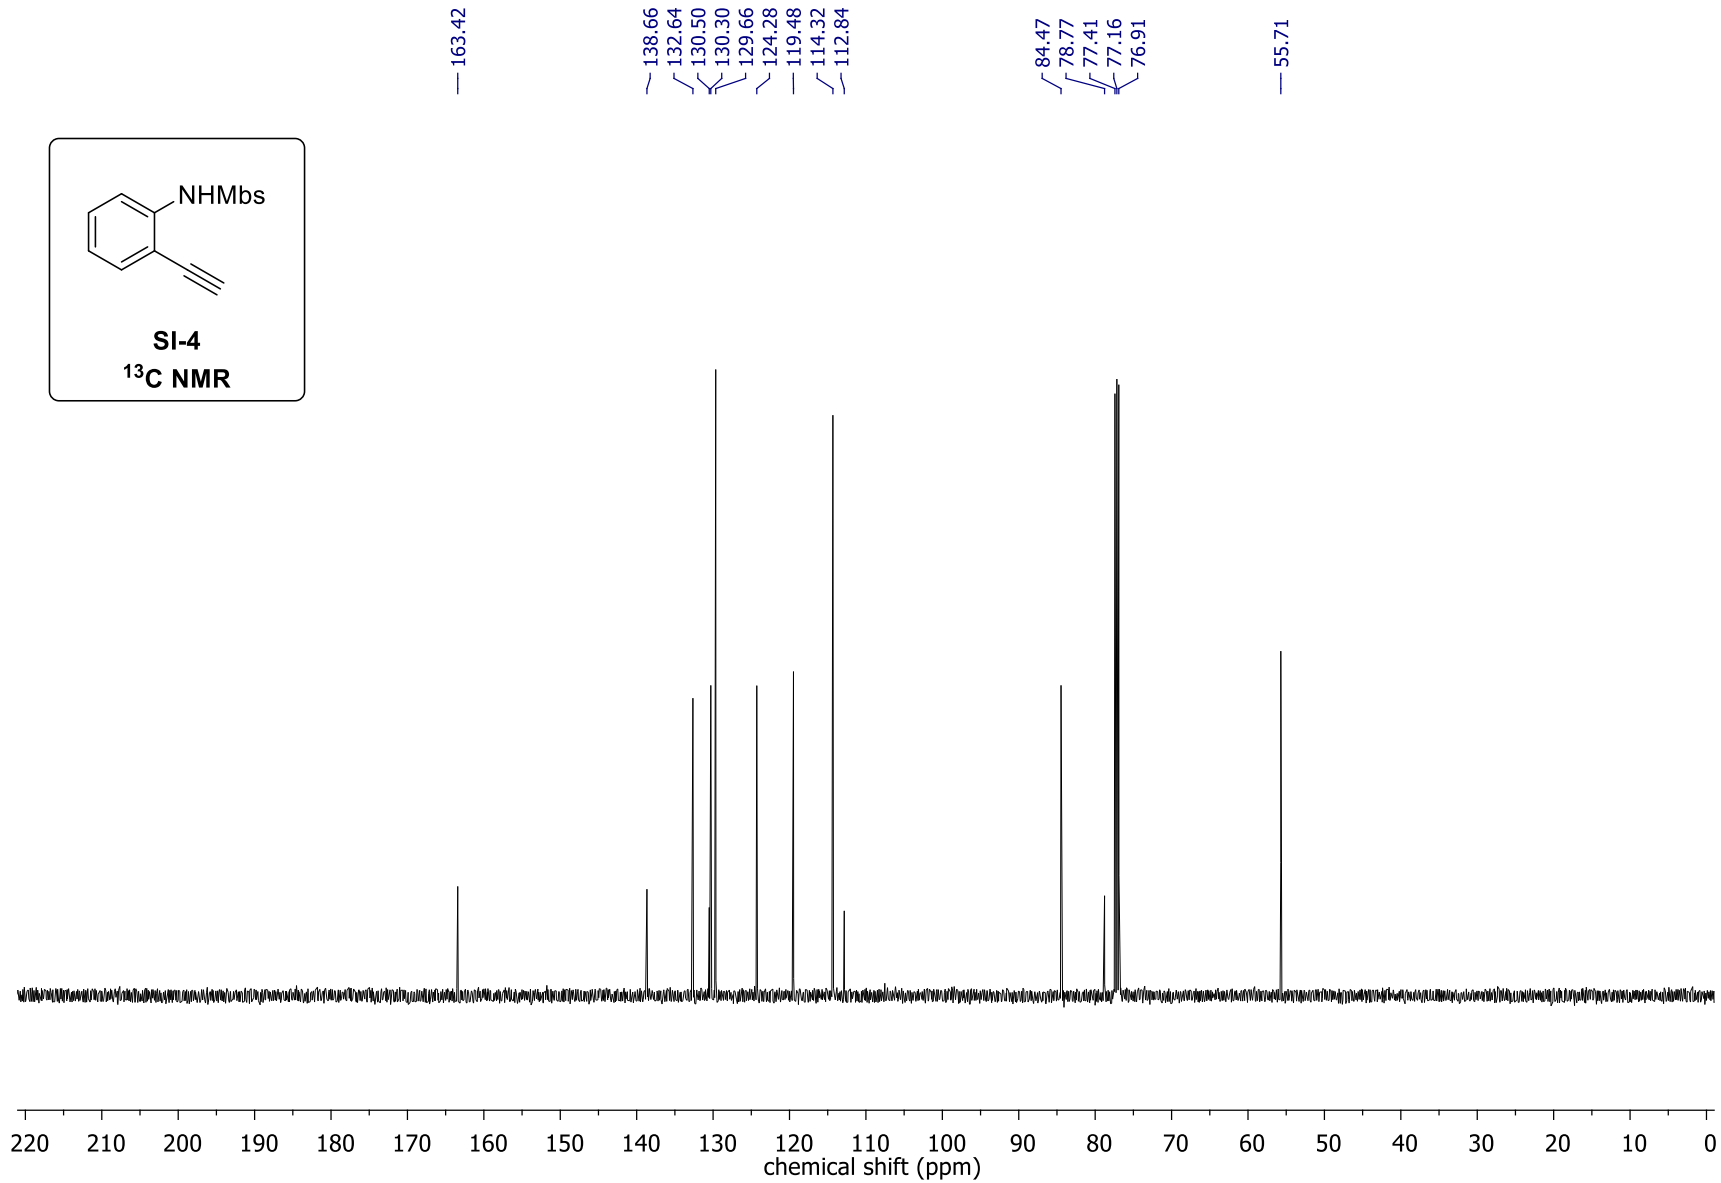

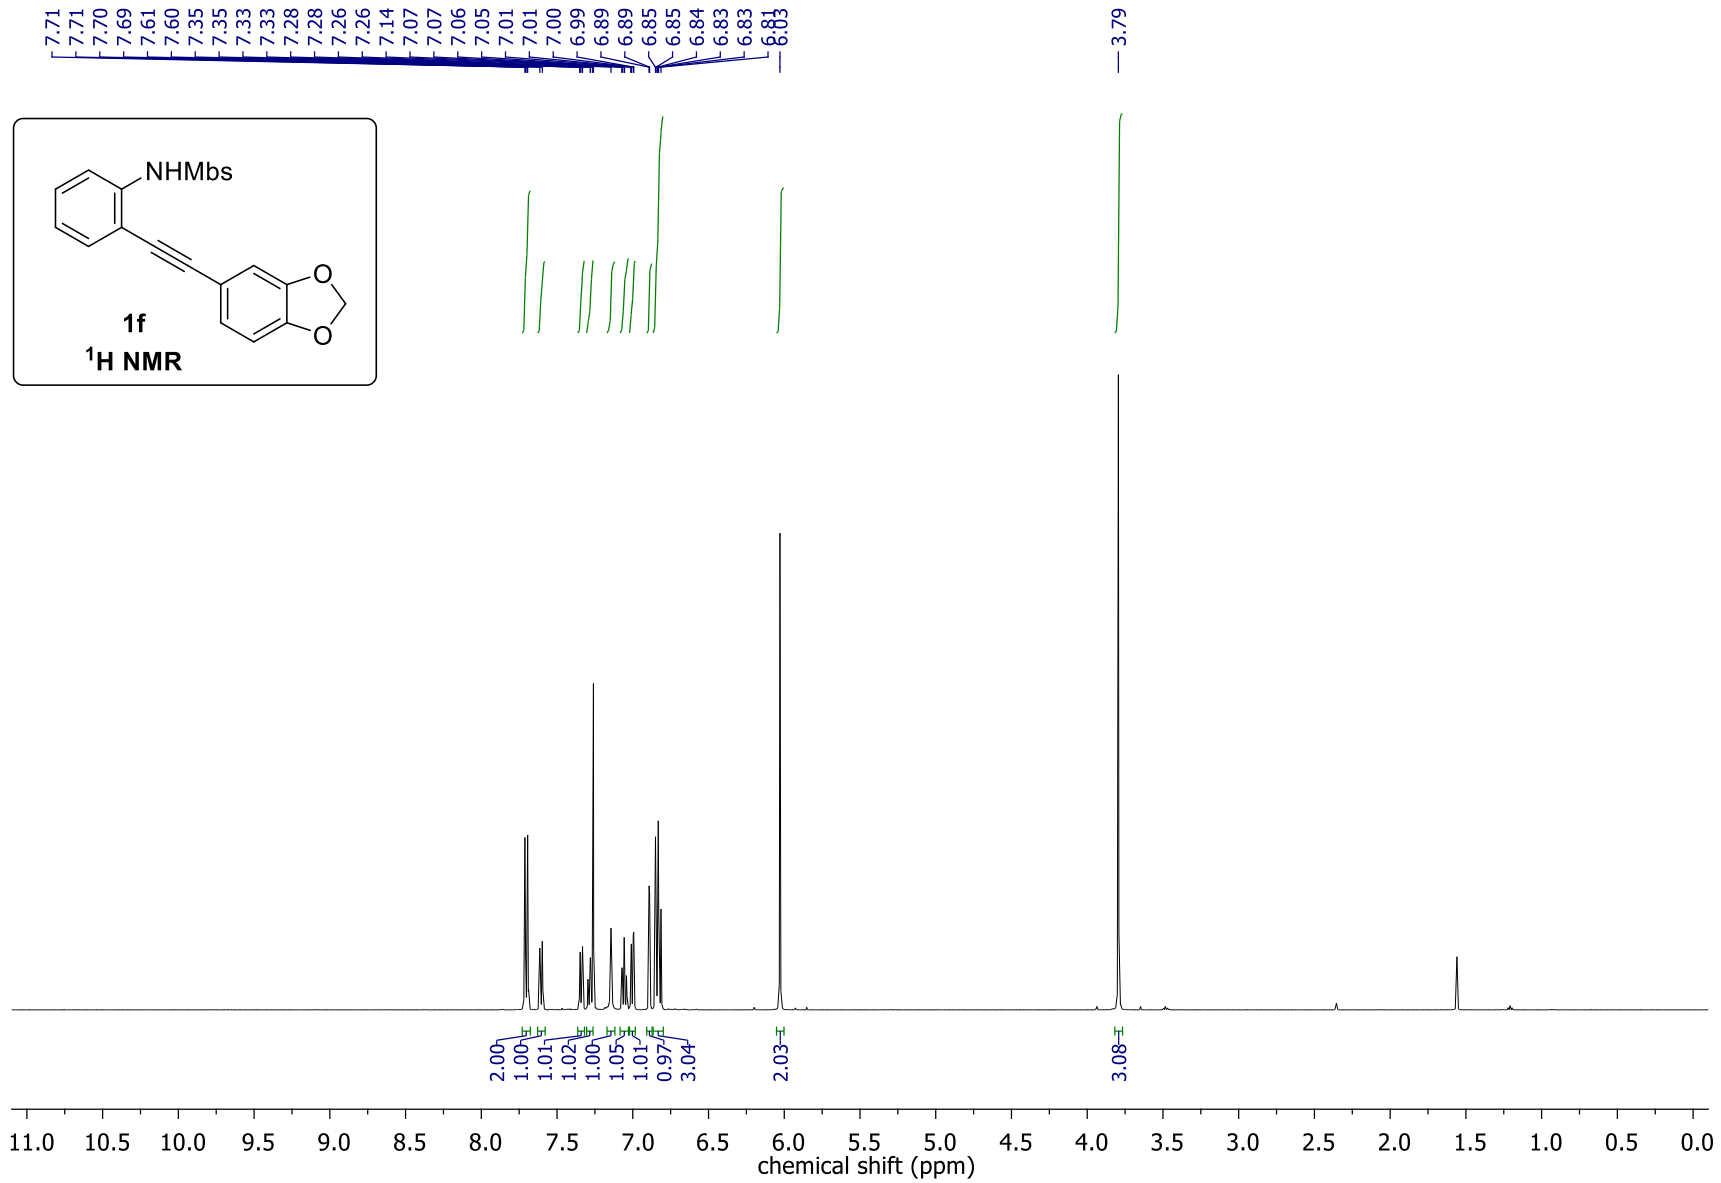

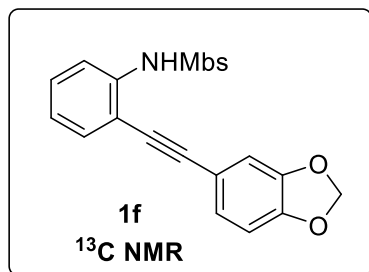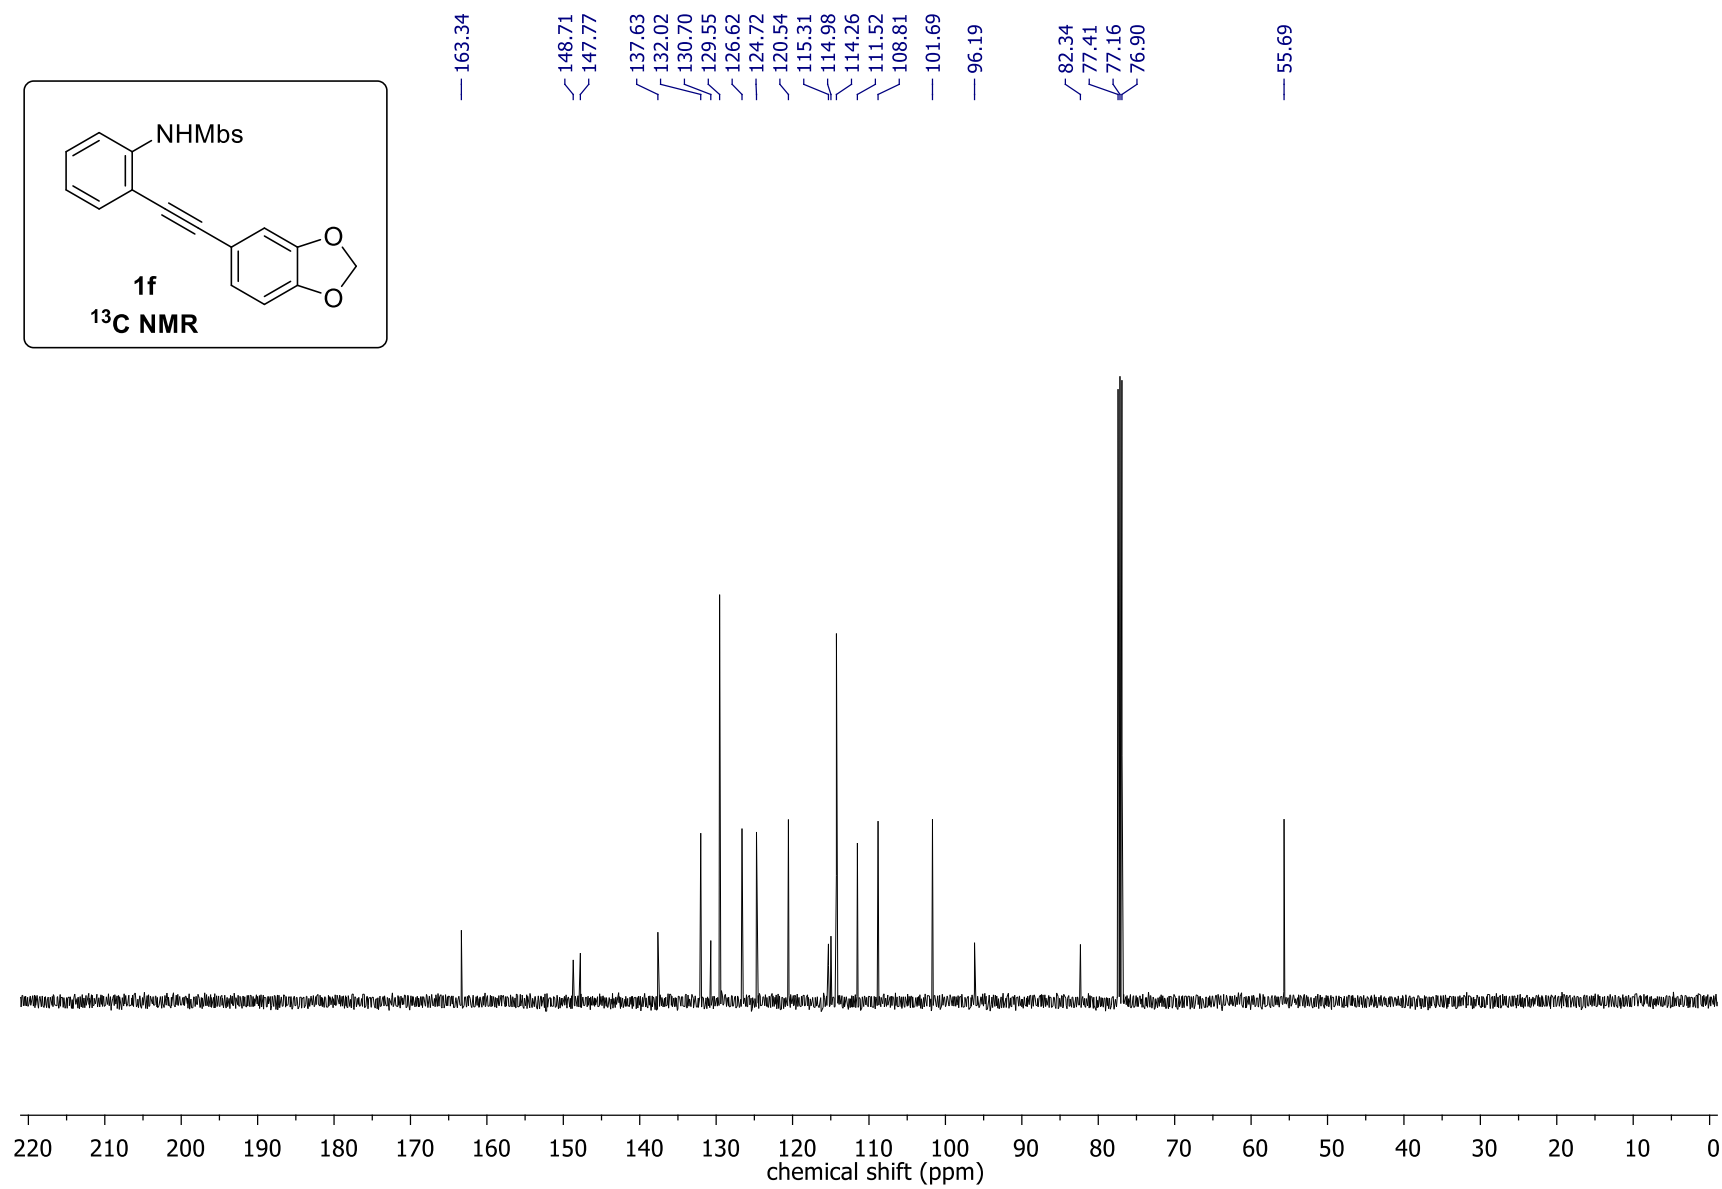



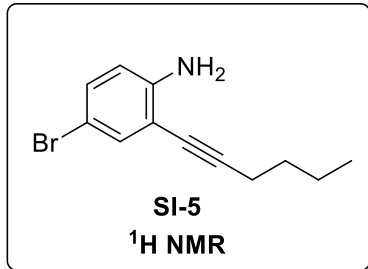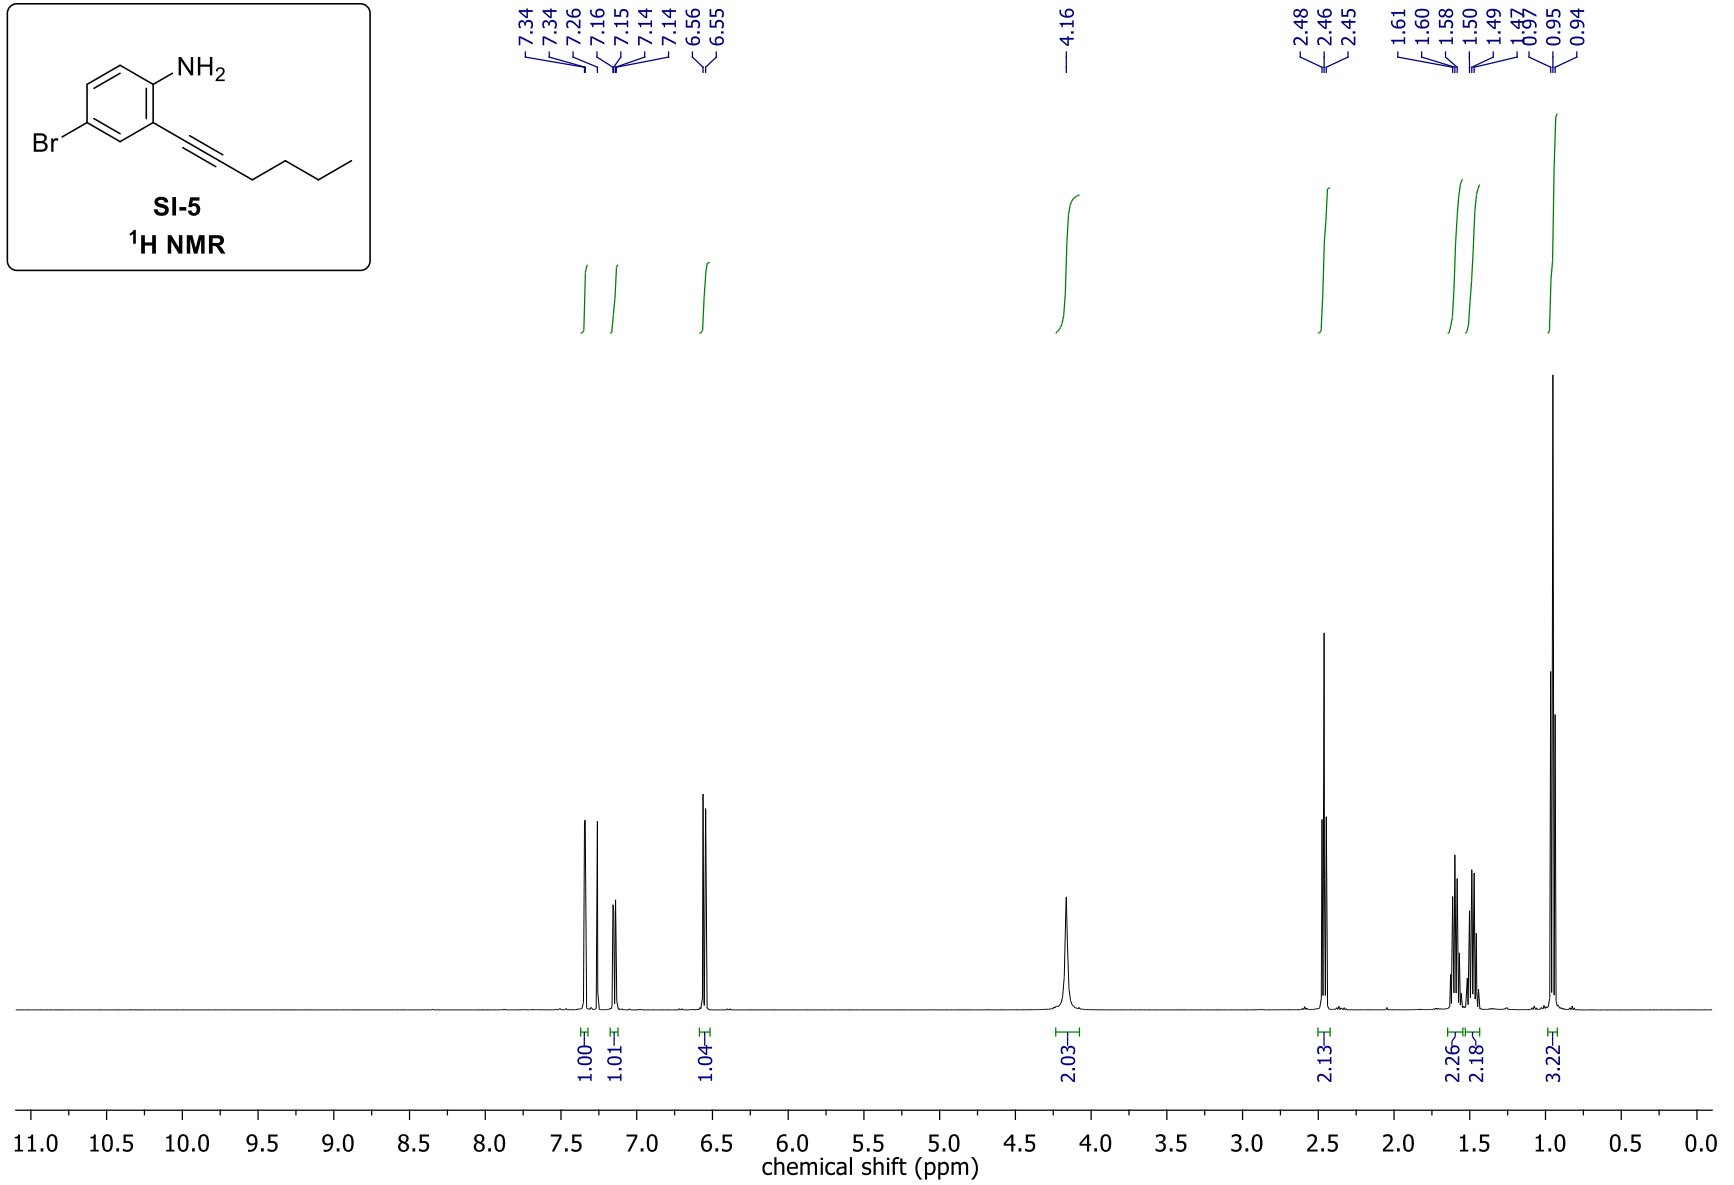

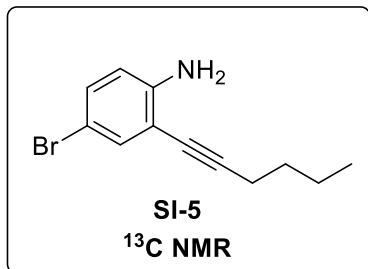

— 146.76

— 134.32  
— 131.66

— 115.66  
— 111.02  
— 109.00

— 97.19

{ 77.41  
77.16  
76.90  
75.94 }

— 31.00

{ 22.17  
19.42  
13.76 }

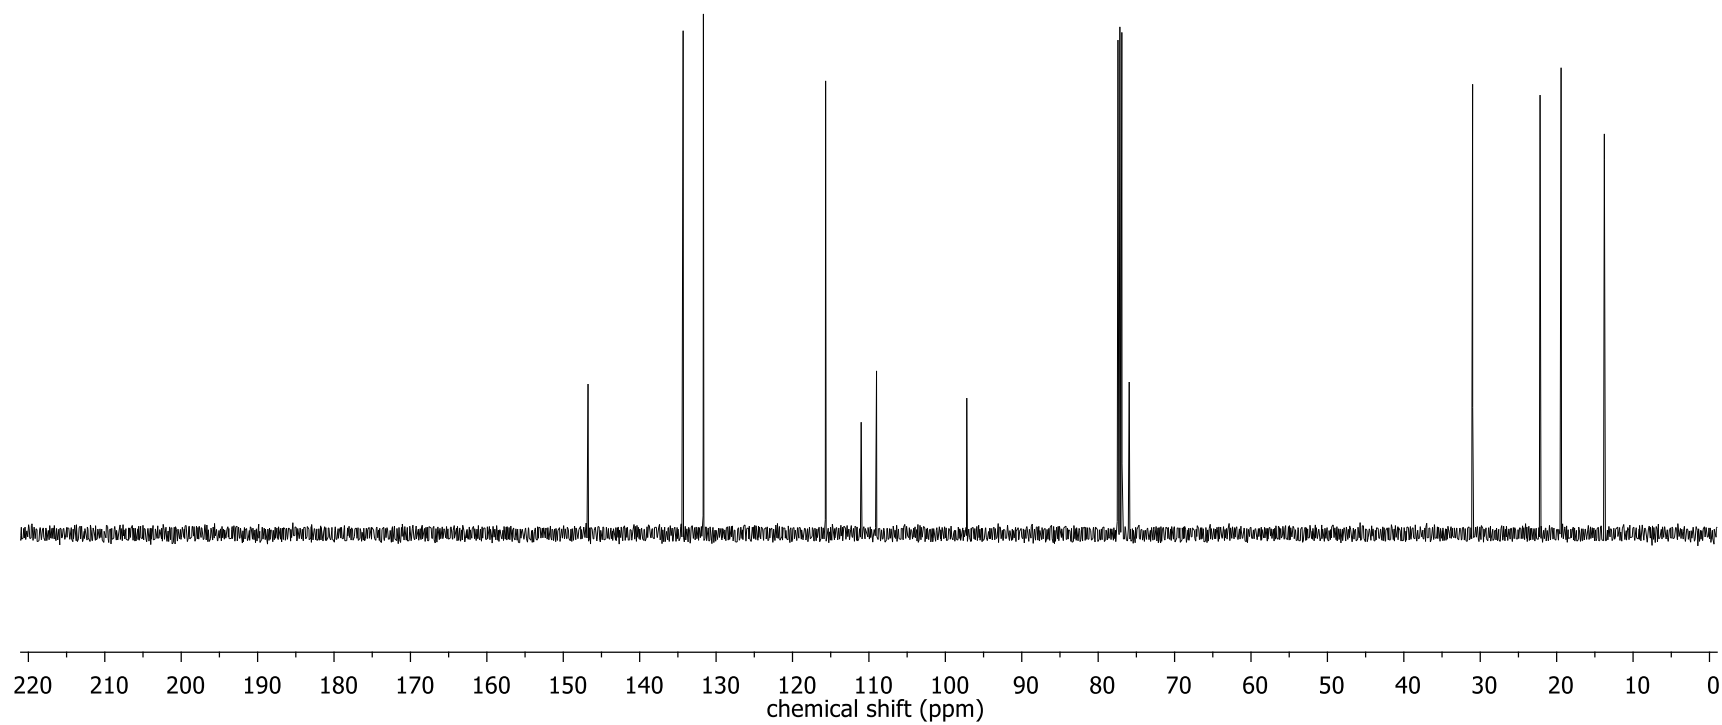

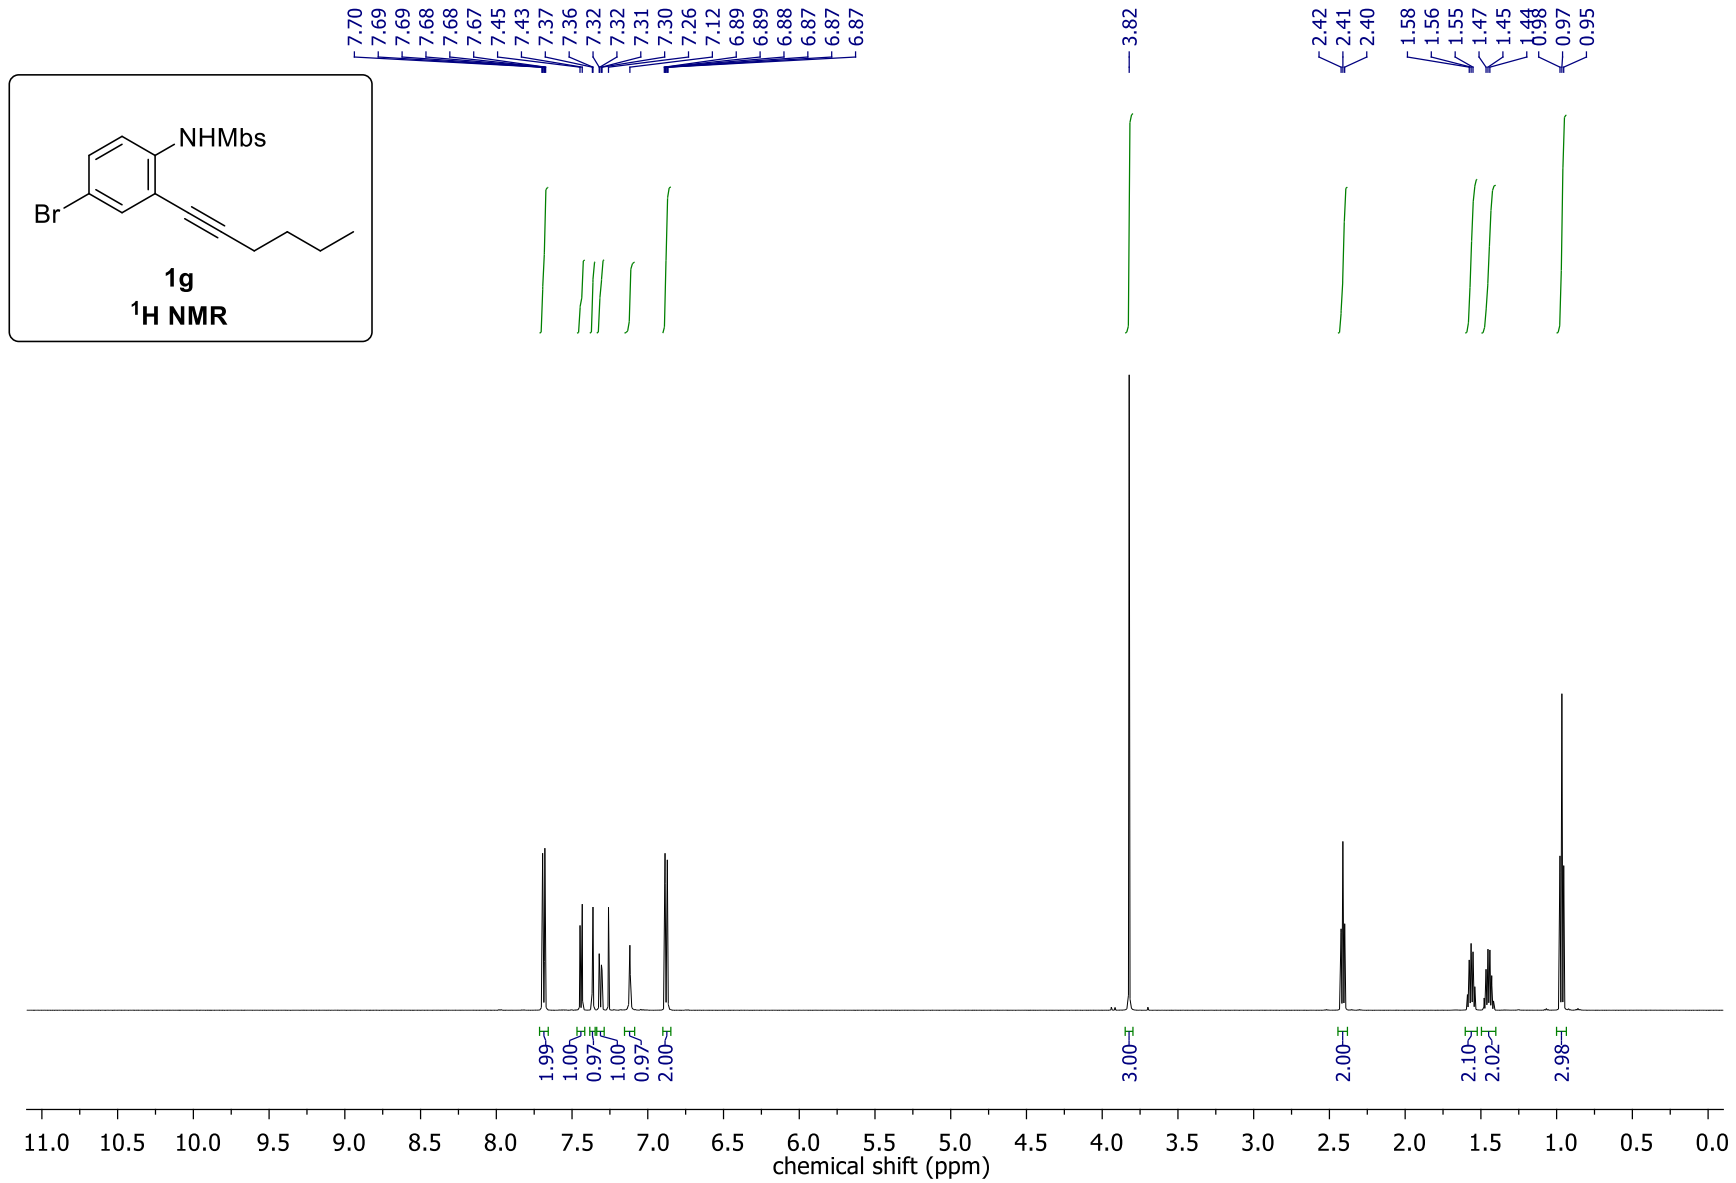

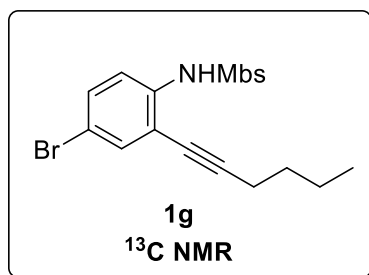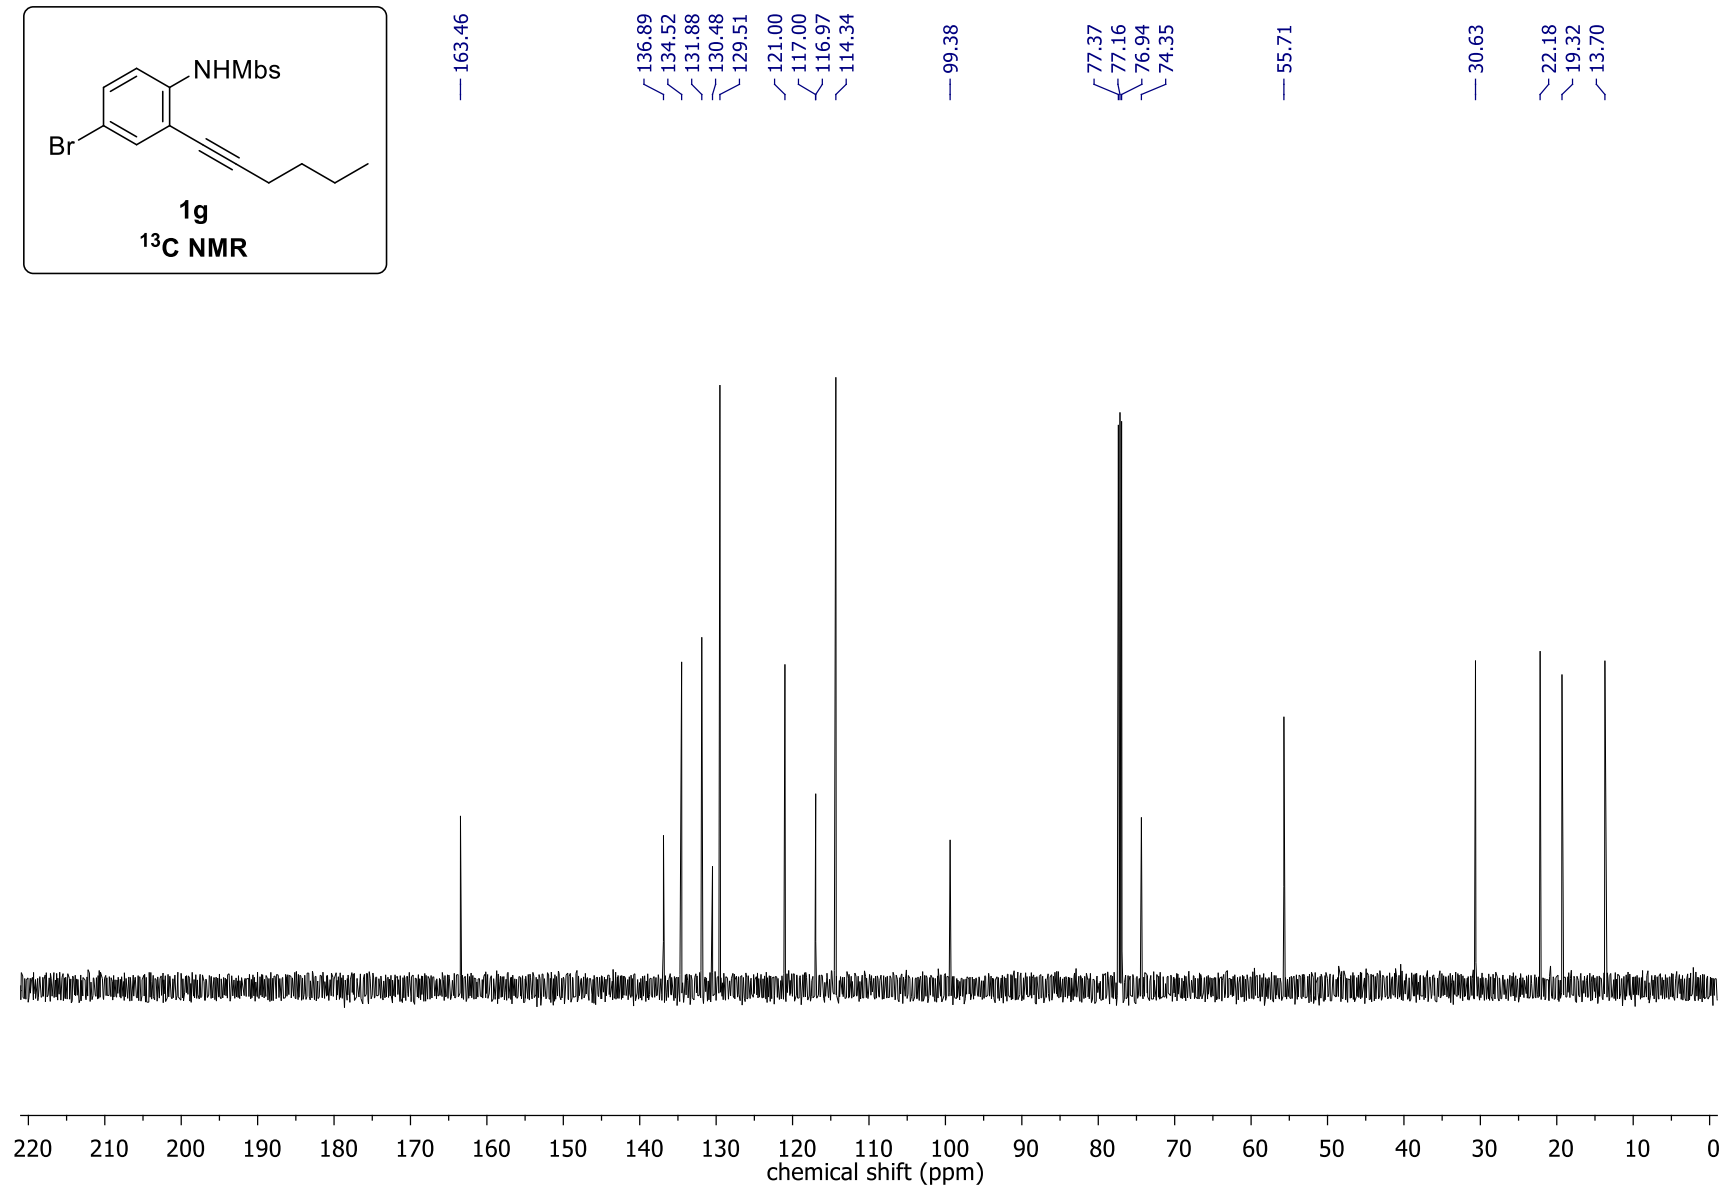

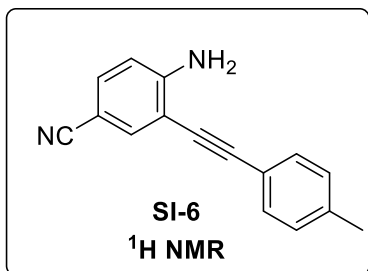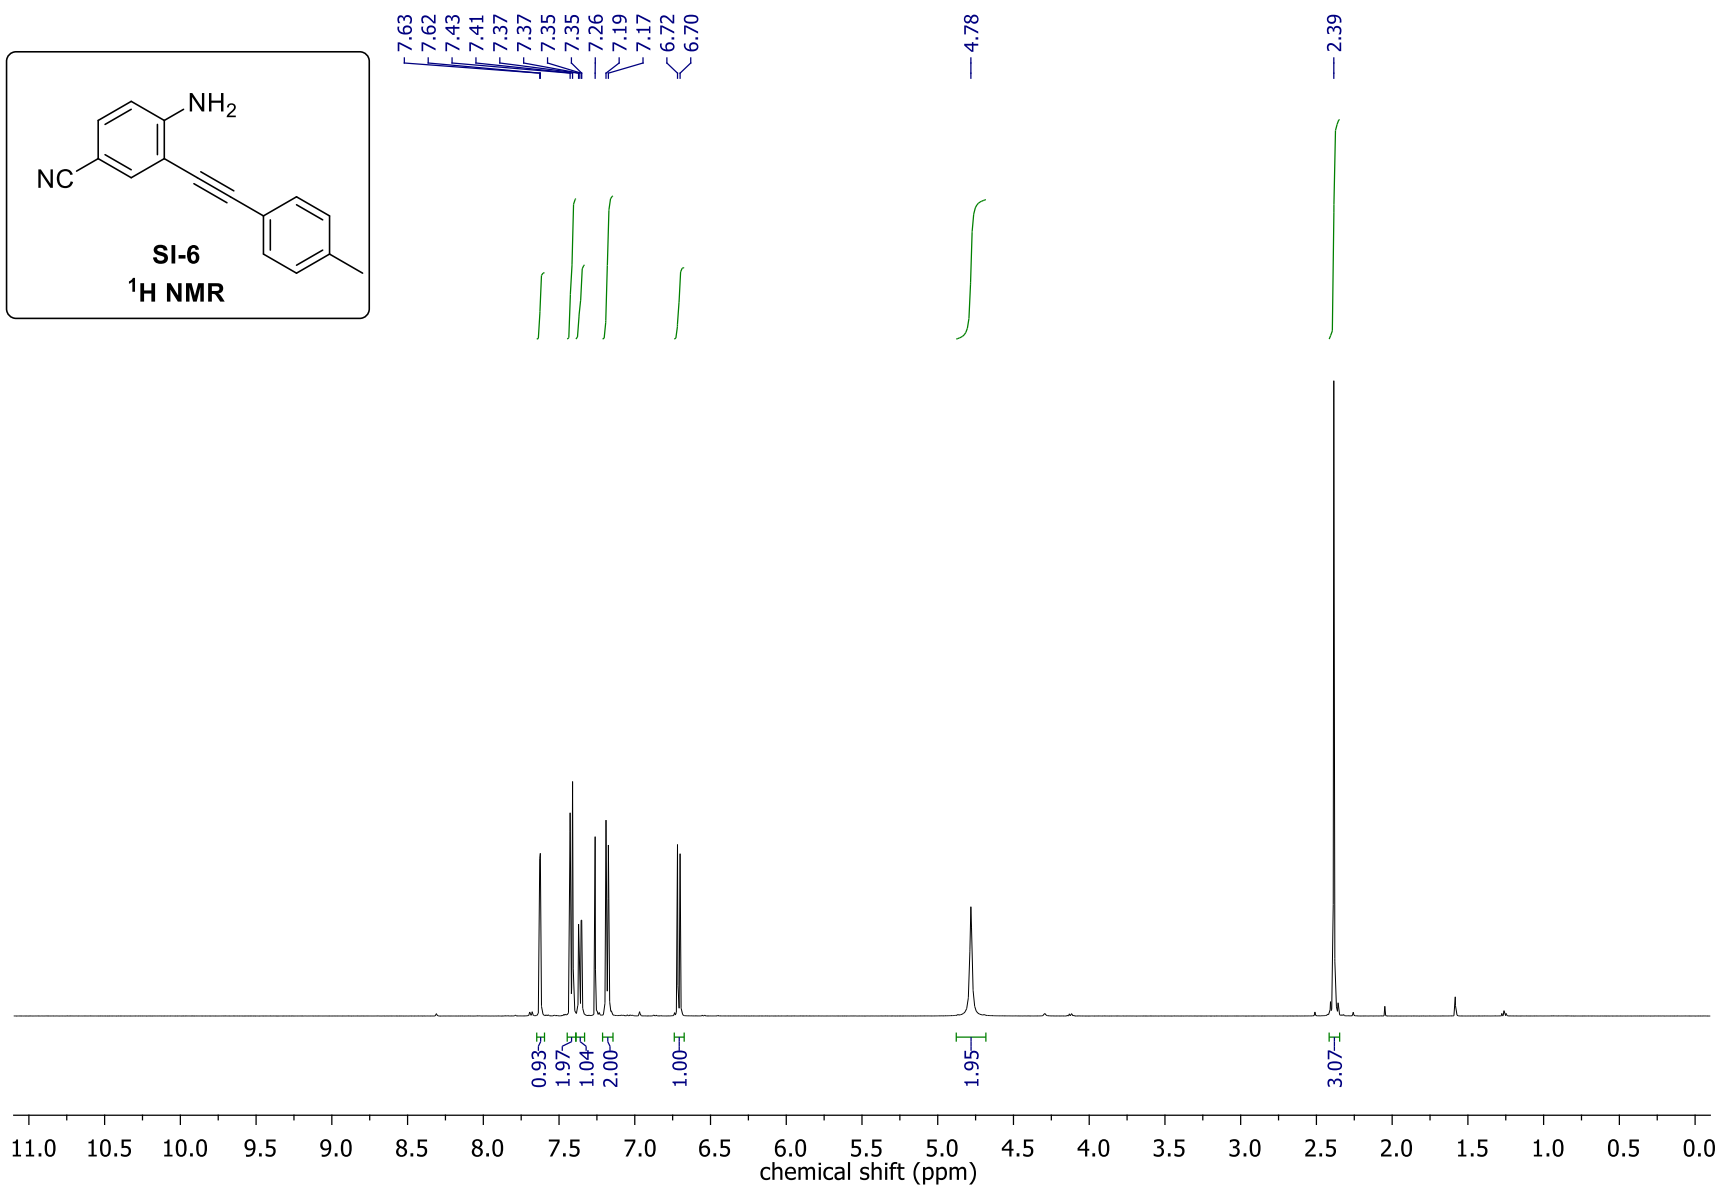

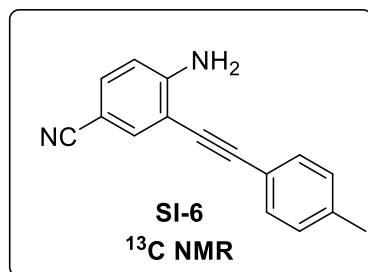

— 151.04  
/ 139.33  
/ 136.37  
/ 133.20  
/ 131.60  
/ 129.41  
/ 119.55  
/ 119.33  
/ 114.03  
/ 108.57  
— 100.28  
— 96.59  
/ 82.83  
/ 77.41  
/ 77.16  
/ 76.90  
— 21.69

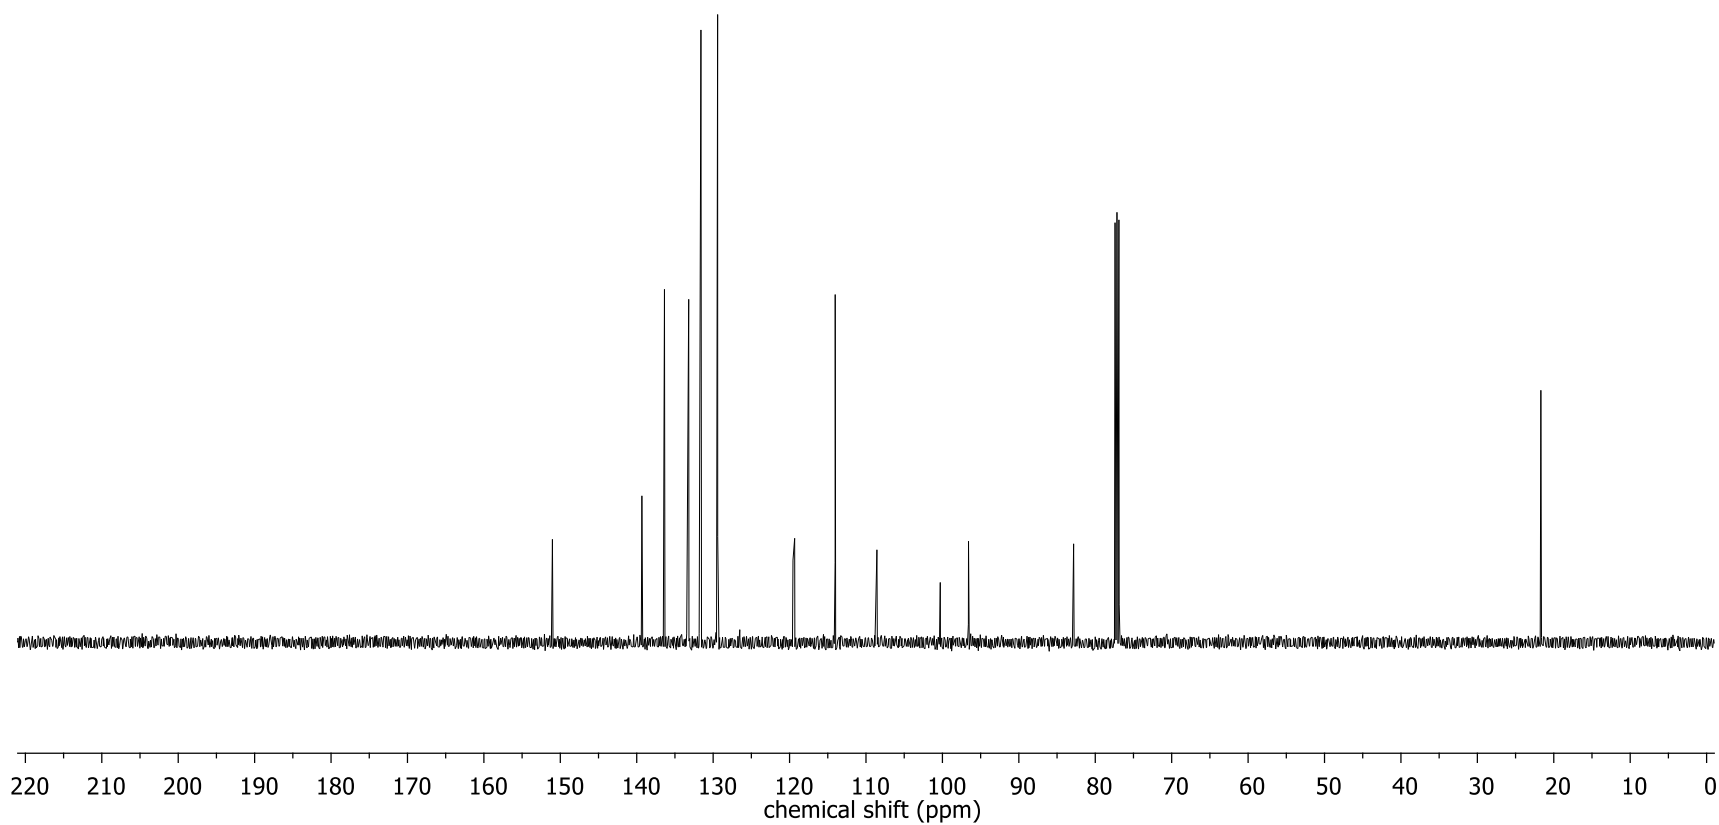

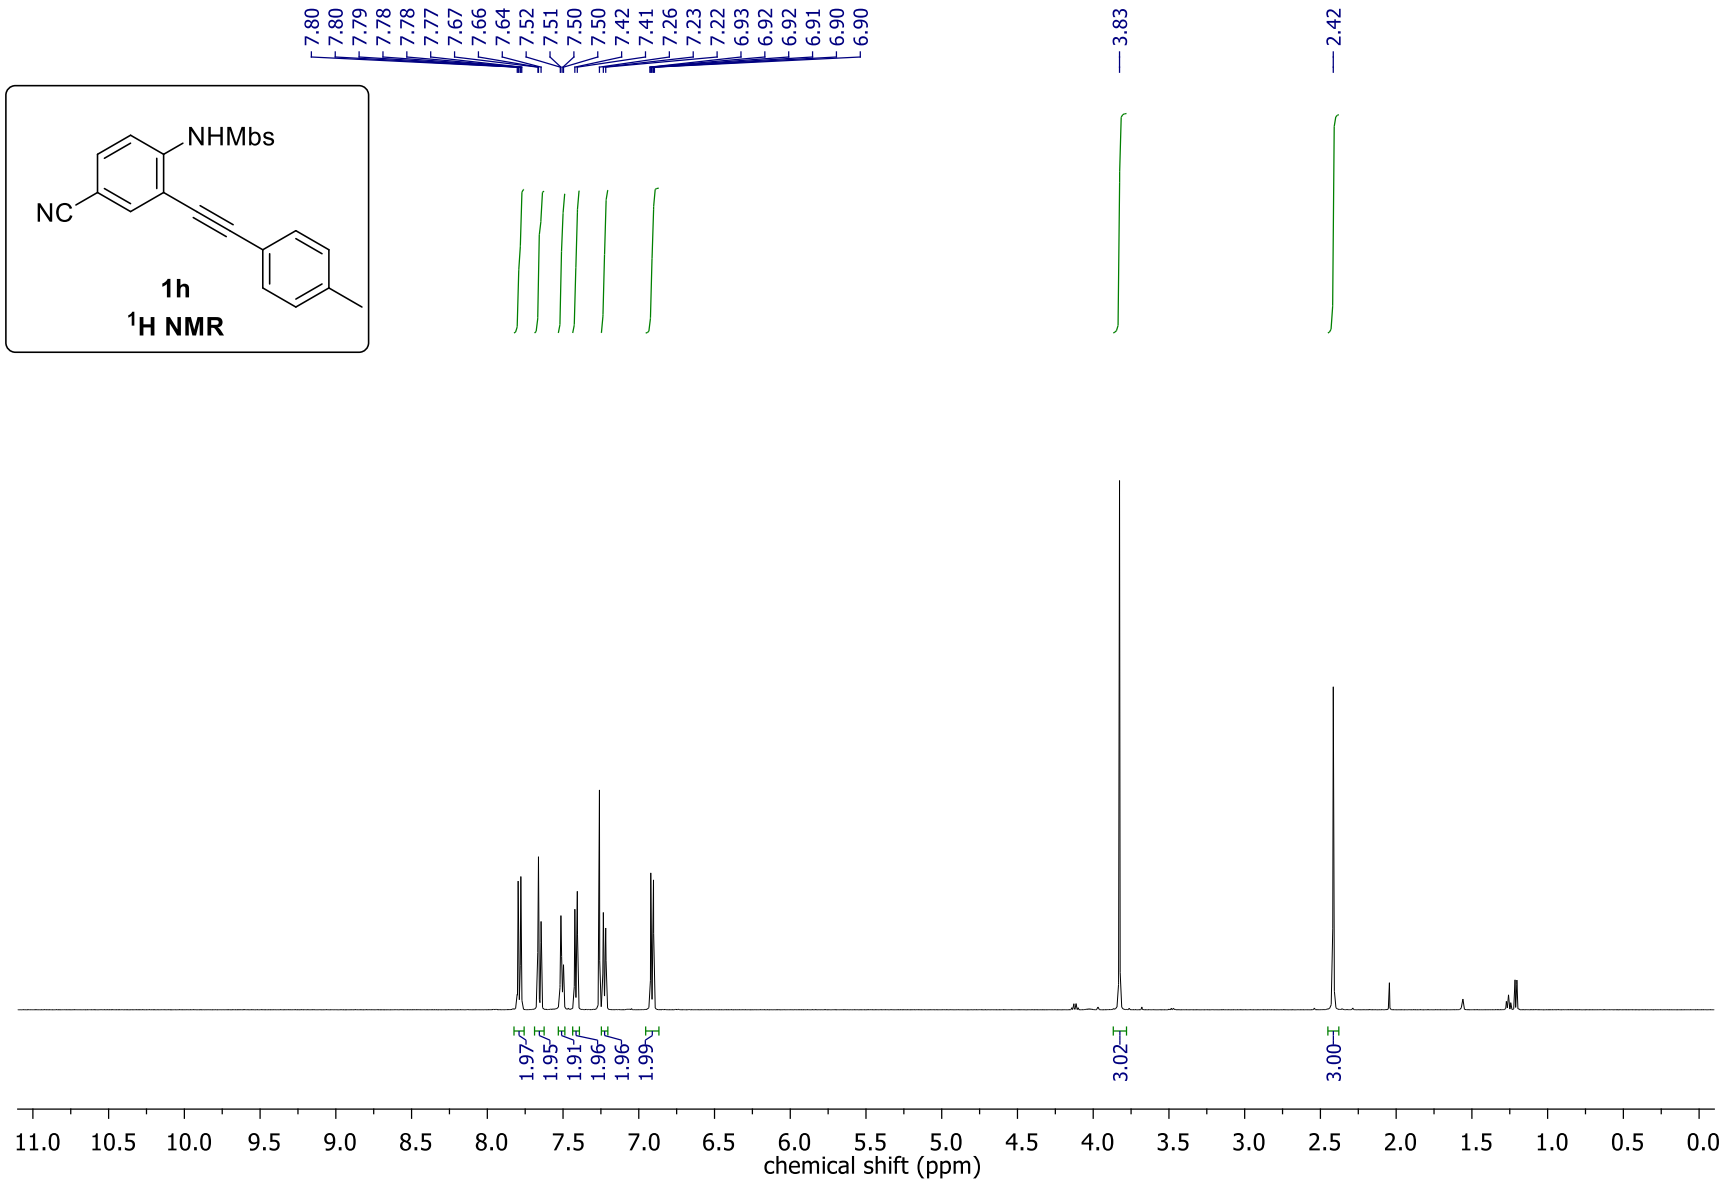

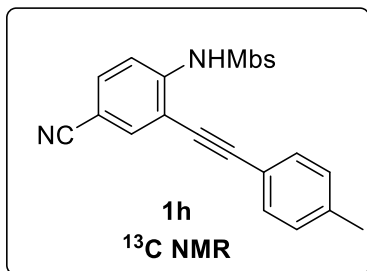

— 163.84  
— 141.42  
— 140.44  
— 135.75  
— 132.89  
— 131.82  
— 130.07  
— 129.64  
— 118.43  
— 118.05  
— 117.96  
— 114.67  
— 107.63  
— 99.08  
— 80.96  
— 77.41  
— 77.16  
— 76.90  
— 55.81  
— 21.80

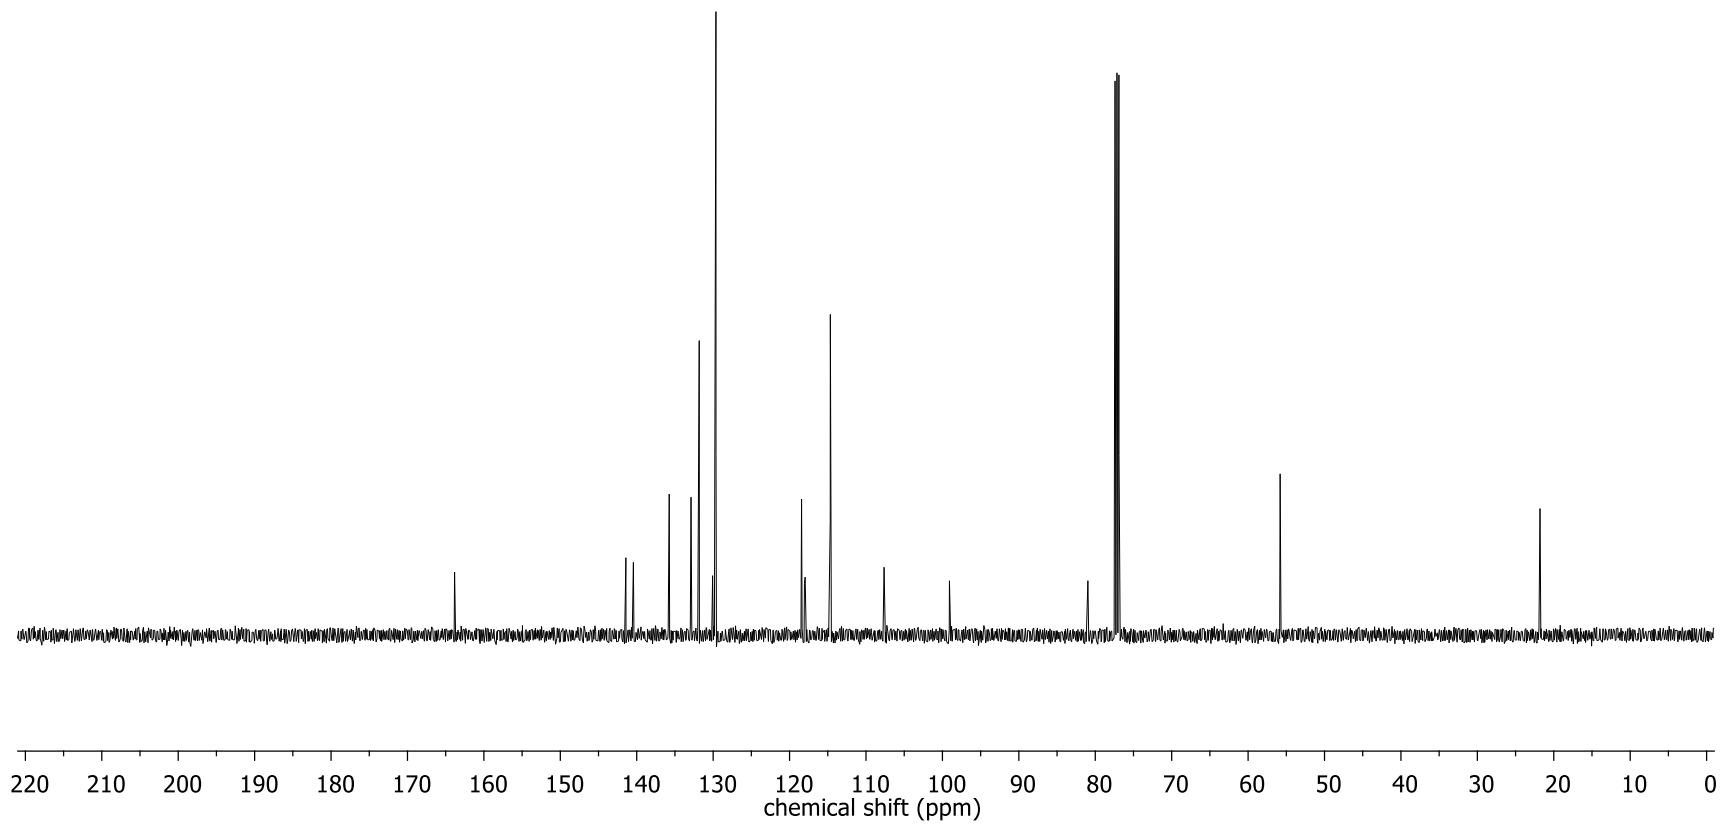



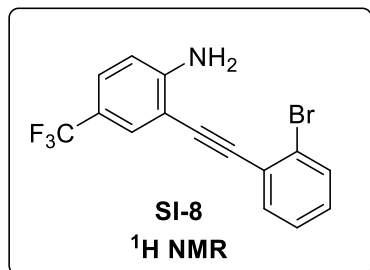

7.64  
 7.64  
 7.63  
 7.58  
 7.57  
 7.38  
 7.36  
 7.34  
 7.33  
 7.31  
 7.26  
 7.23  
 7.23  
 7.21  
 7.20  
 7.20  
 7.19  
 6.76  
 6.75

4.82

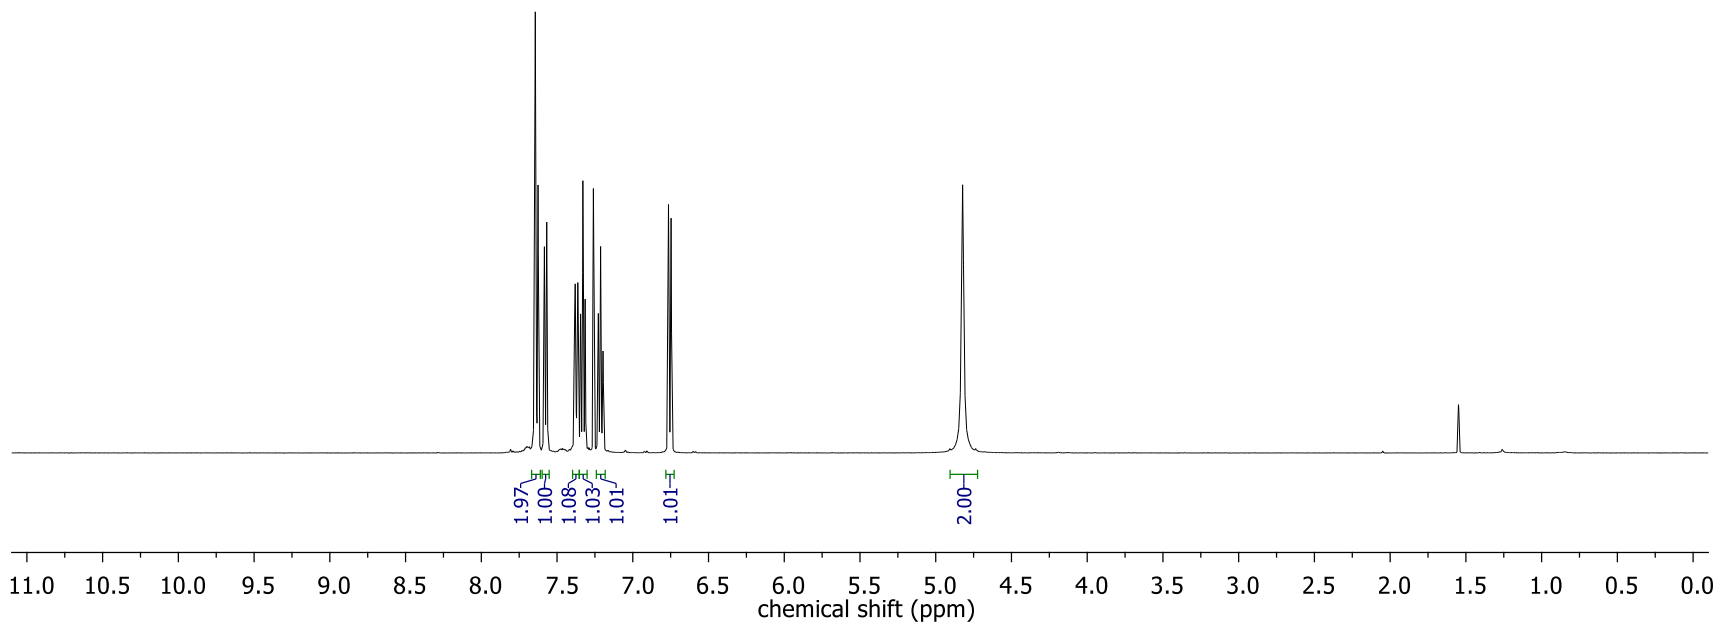

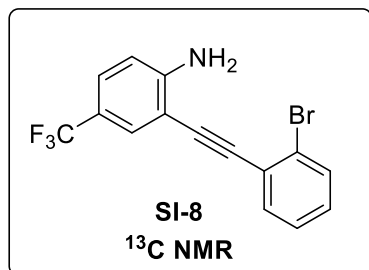

150.90  
133.20  
132.52  
129.79  
129.58  
129.55  
129.51  
127.45  
127.16  
127.13  
127.10  
125.21  
125.10  
113.82  
94.30  
89.57  
77.41  
77.16  
76.90

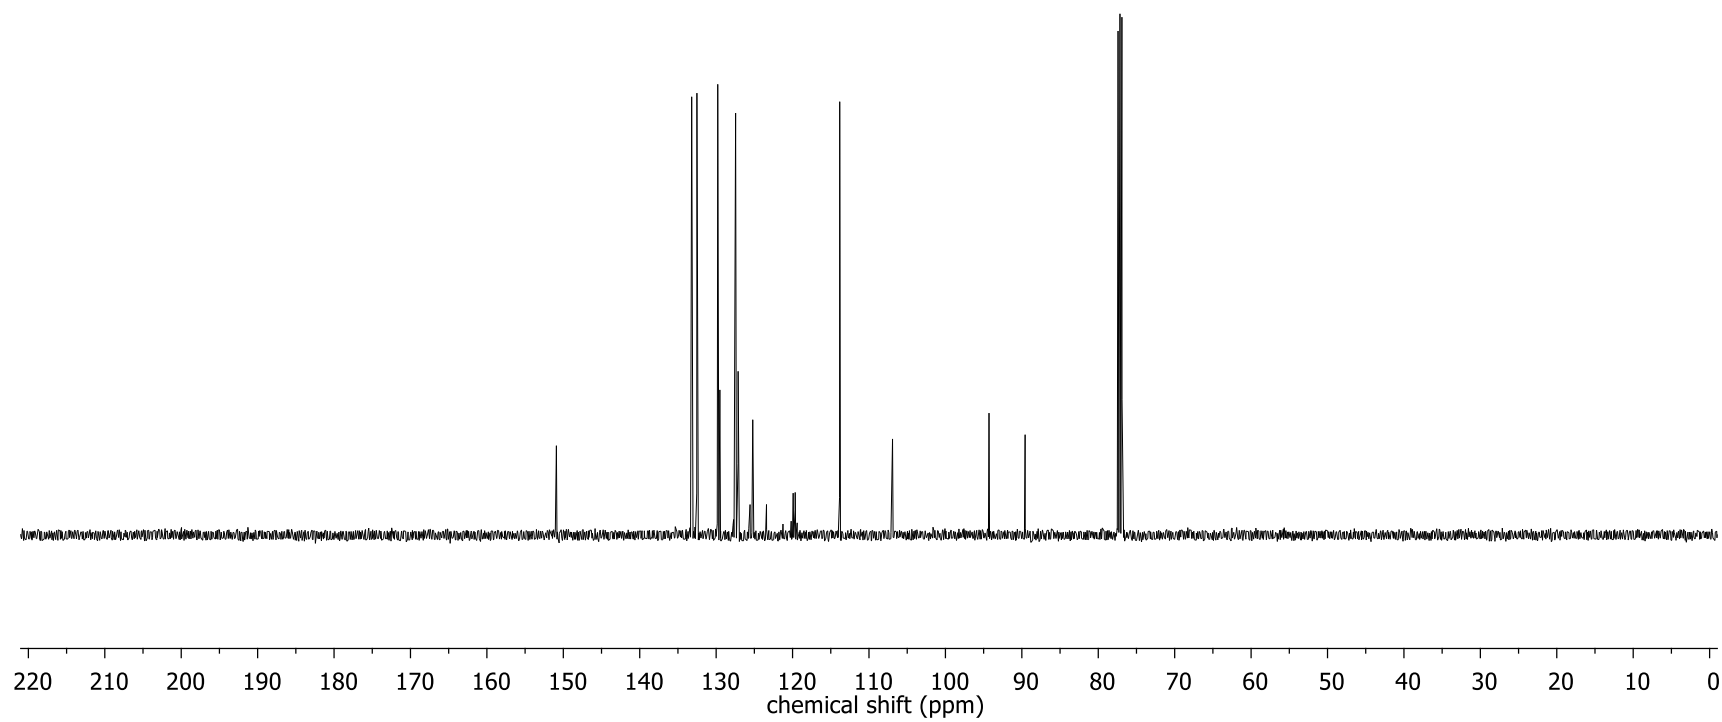

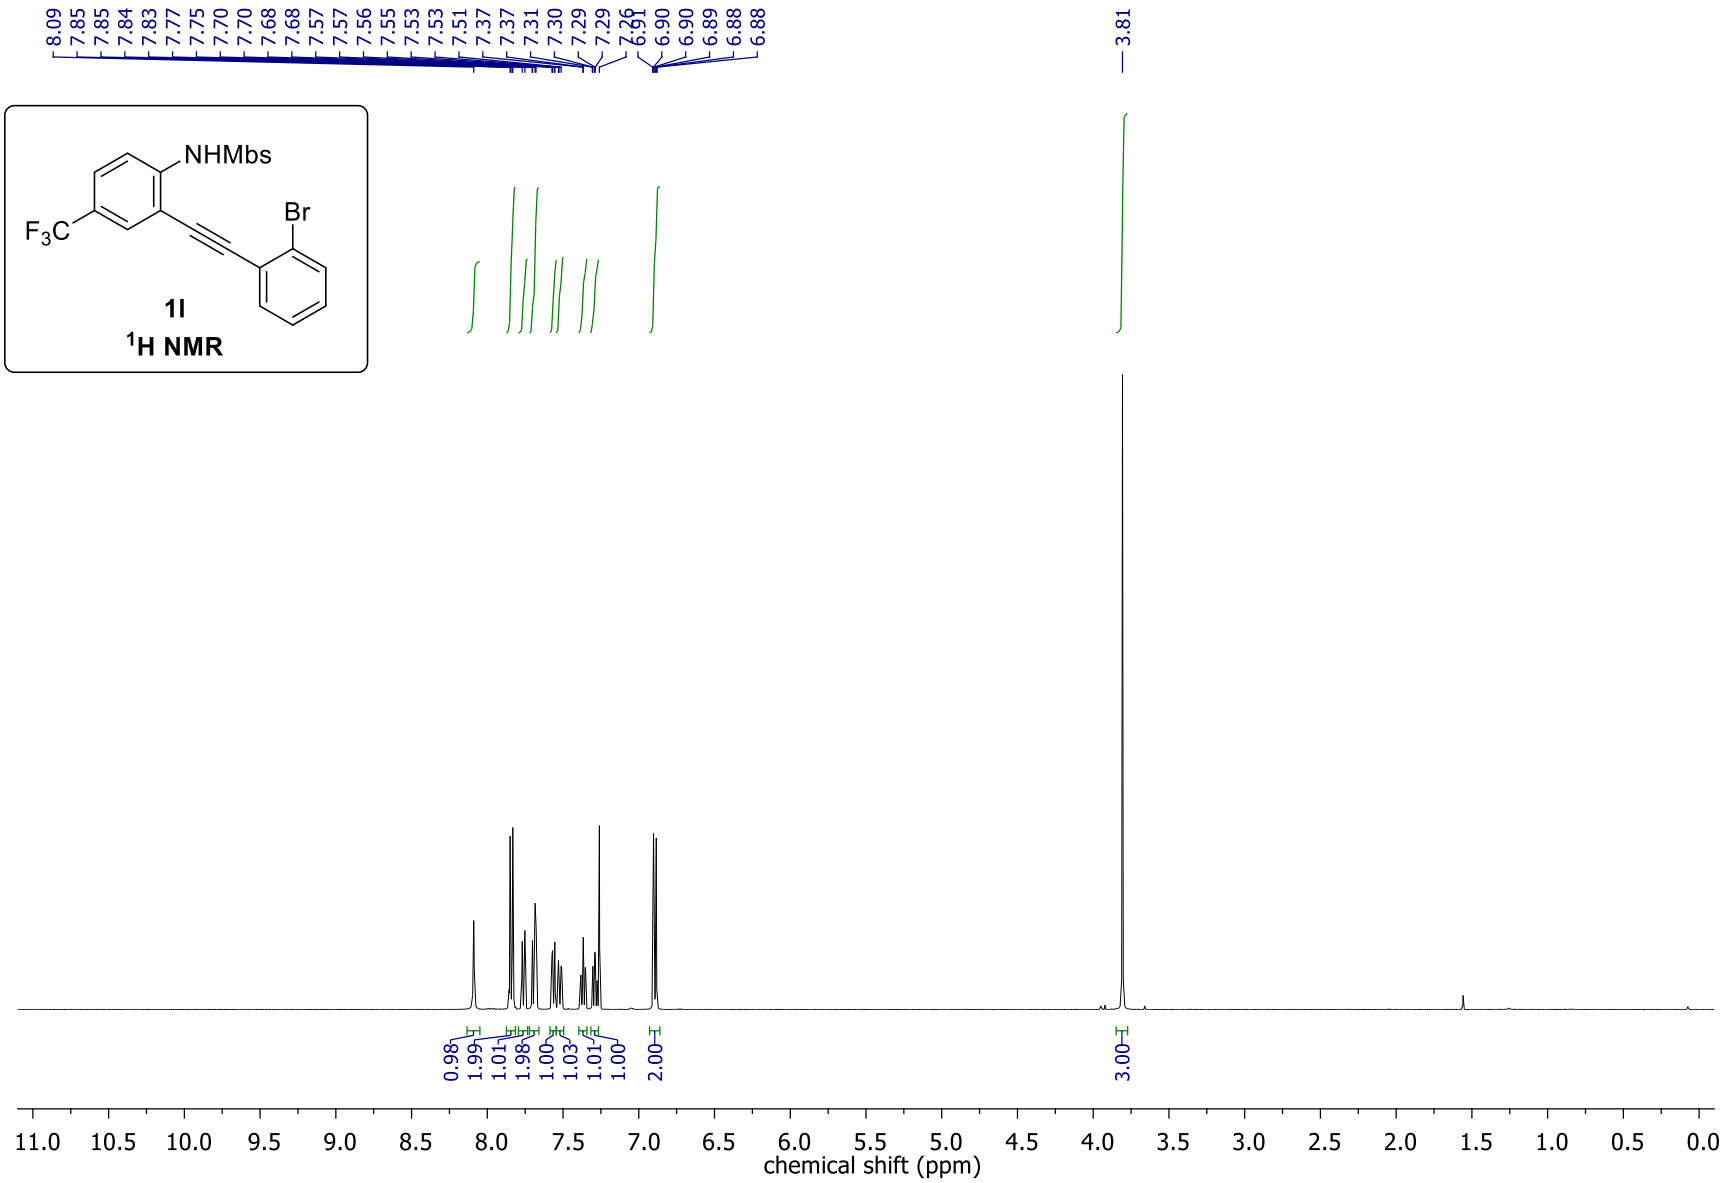

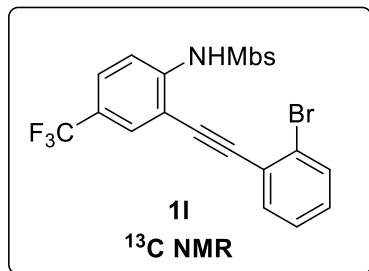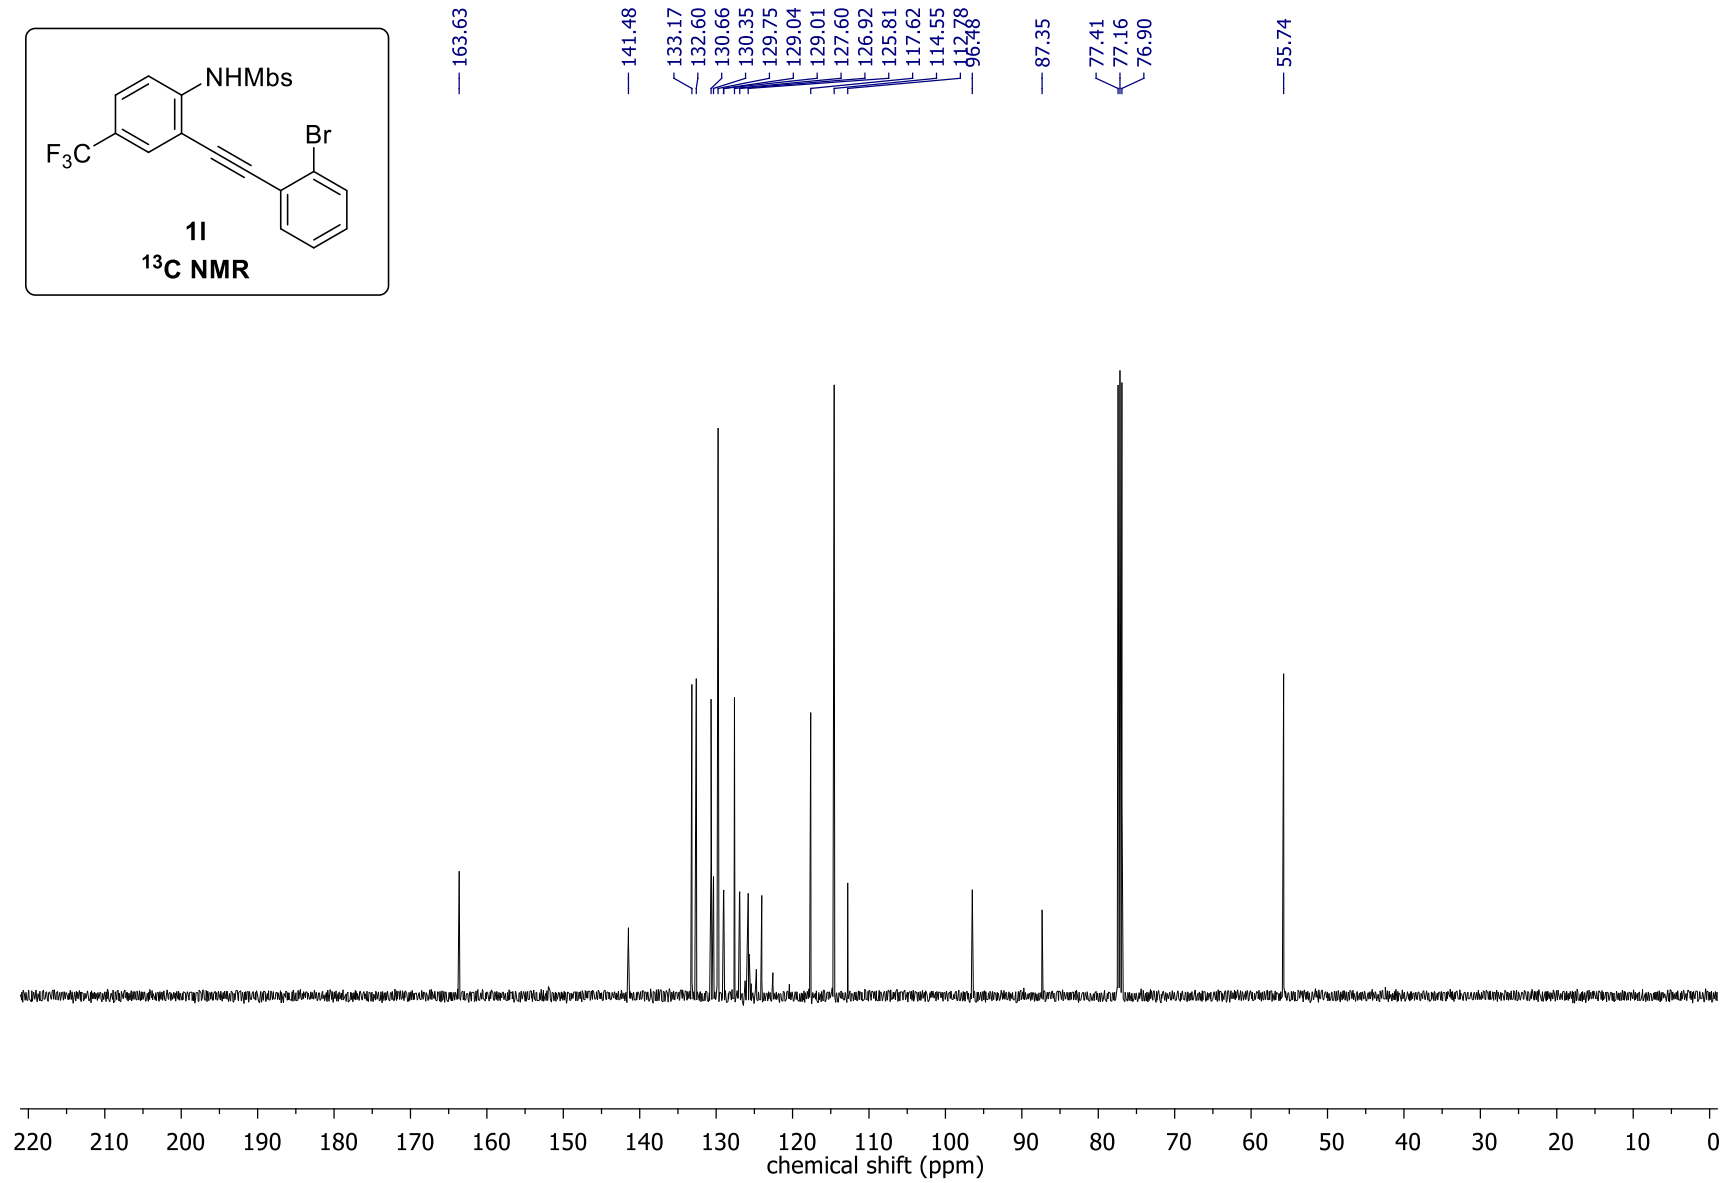

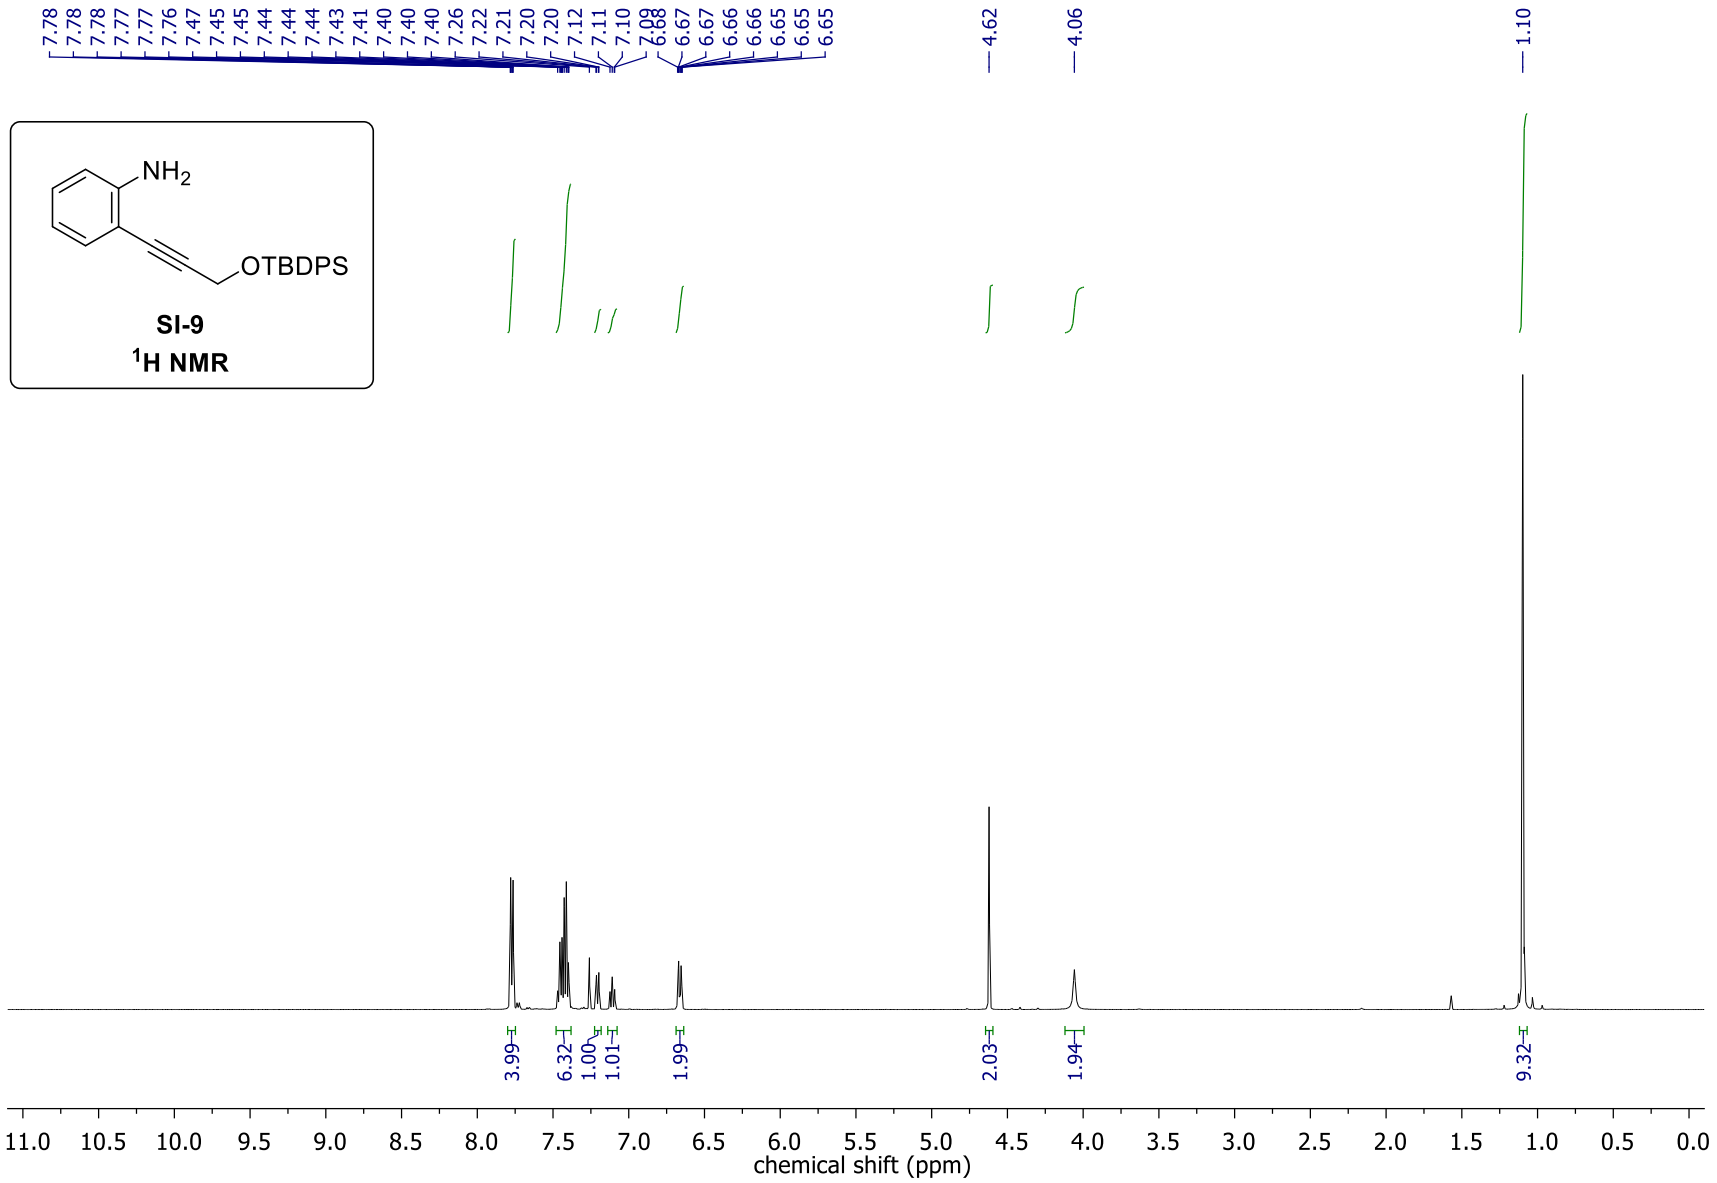

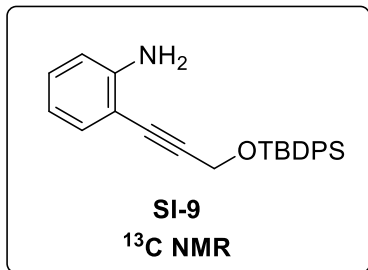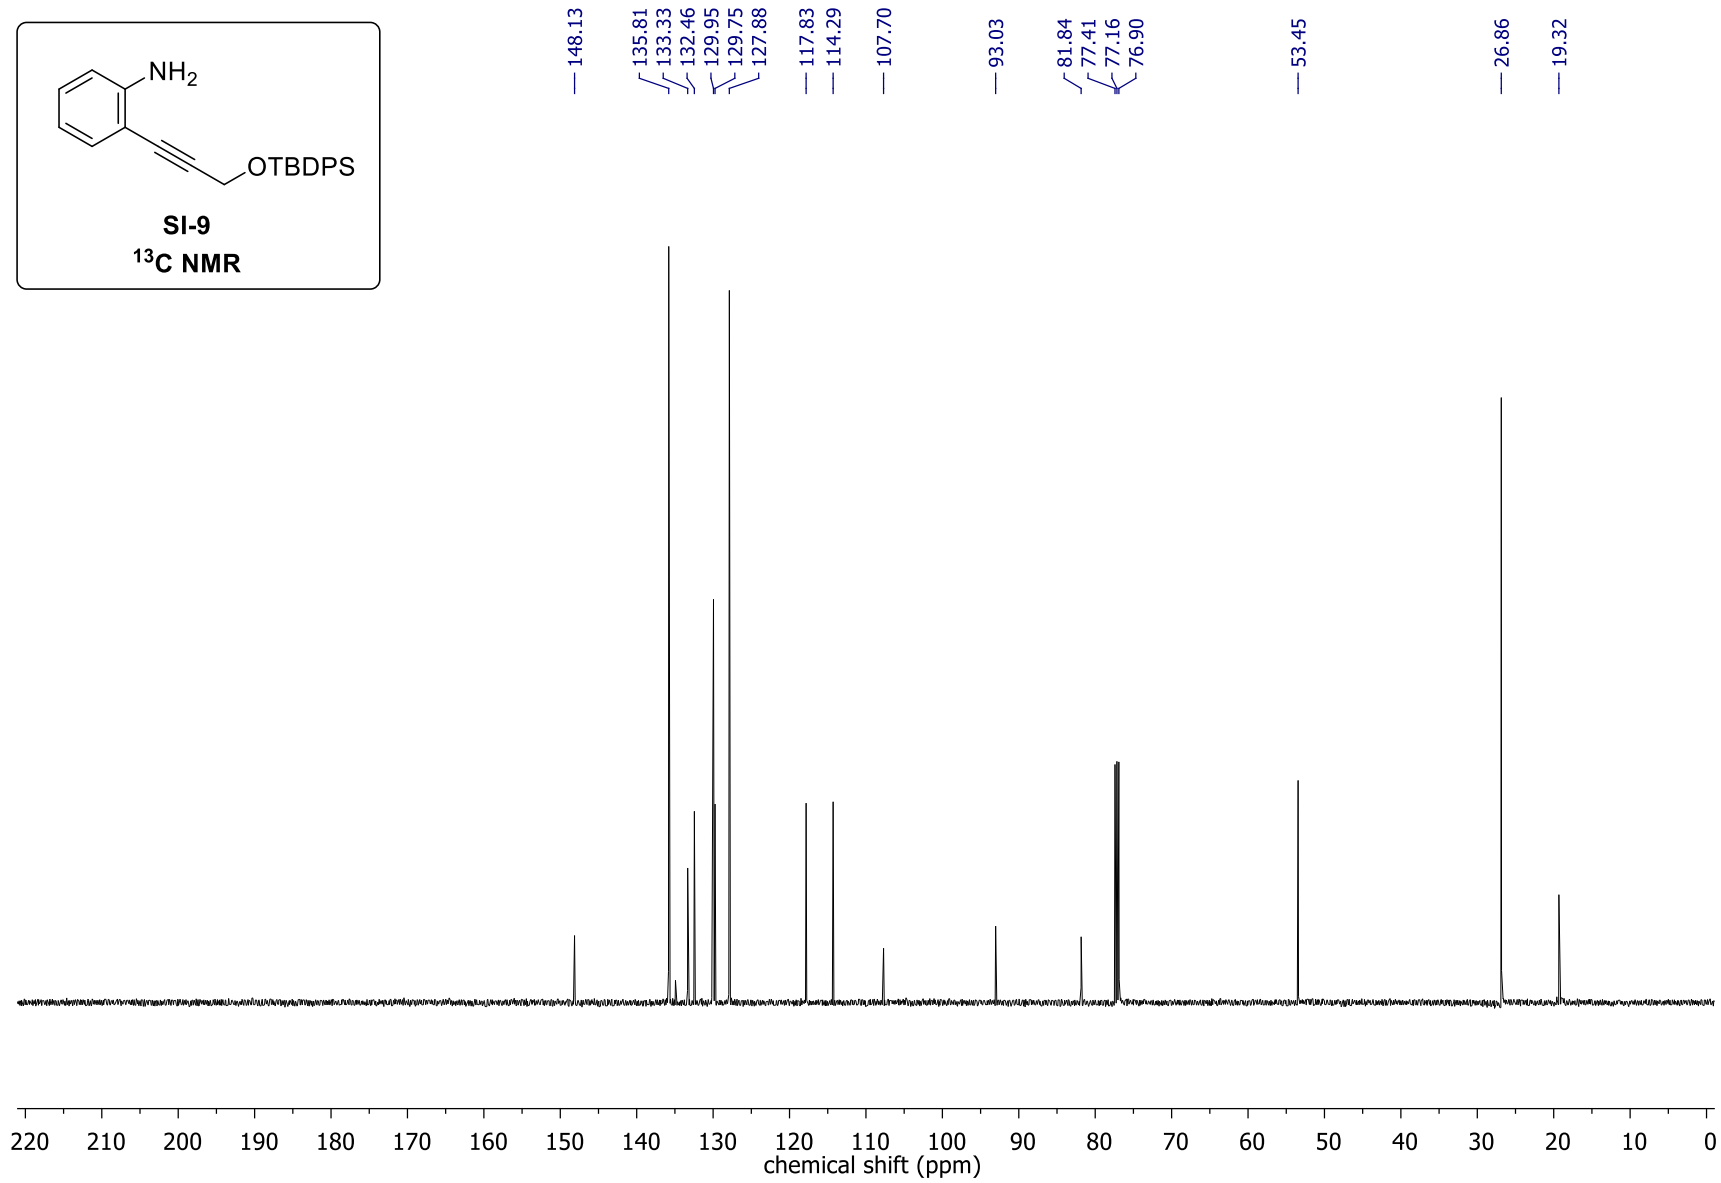

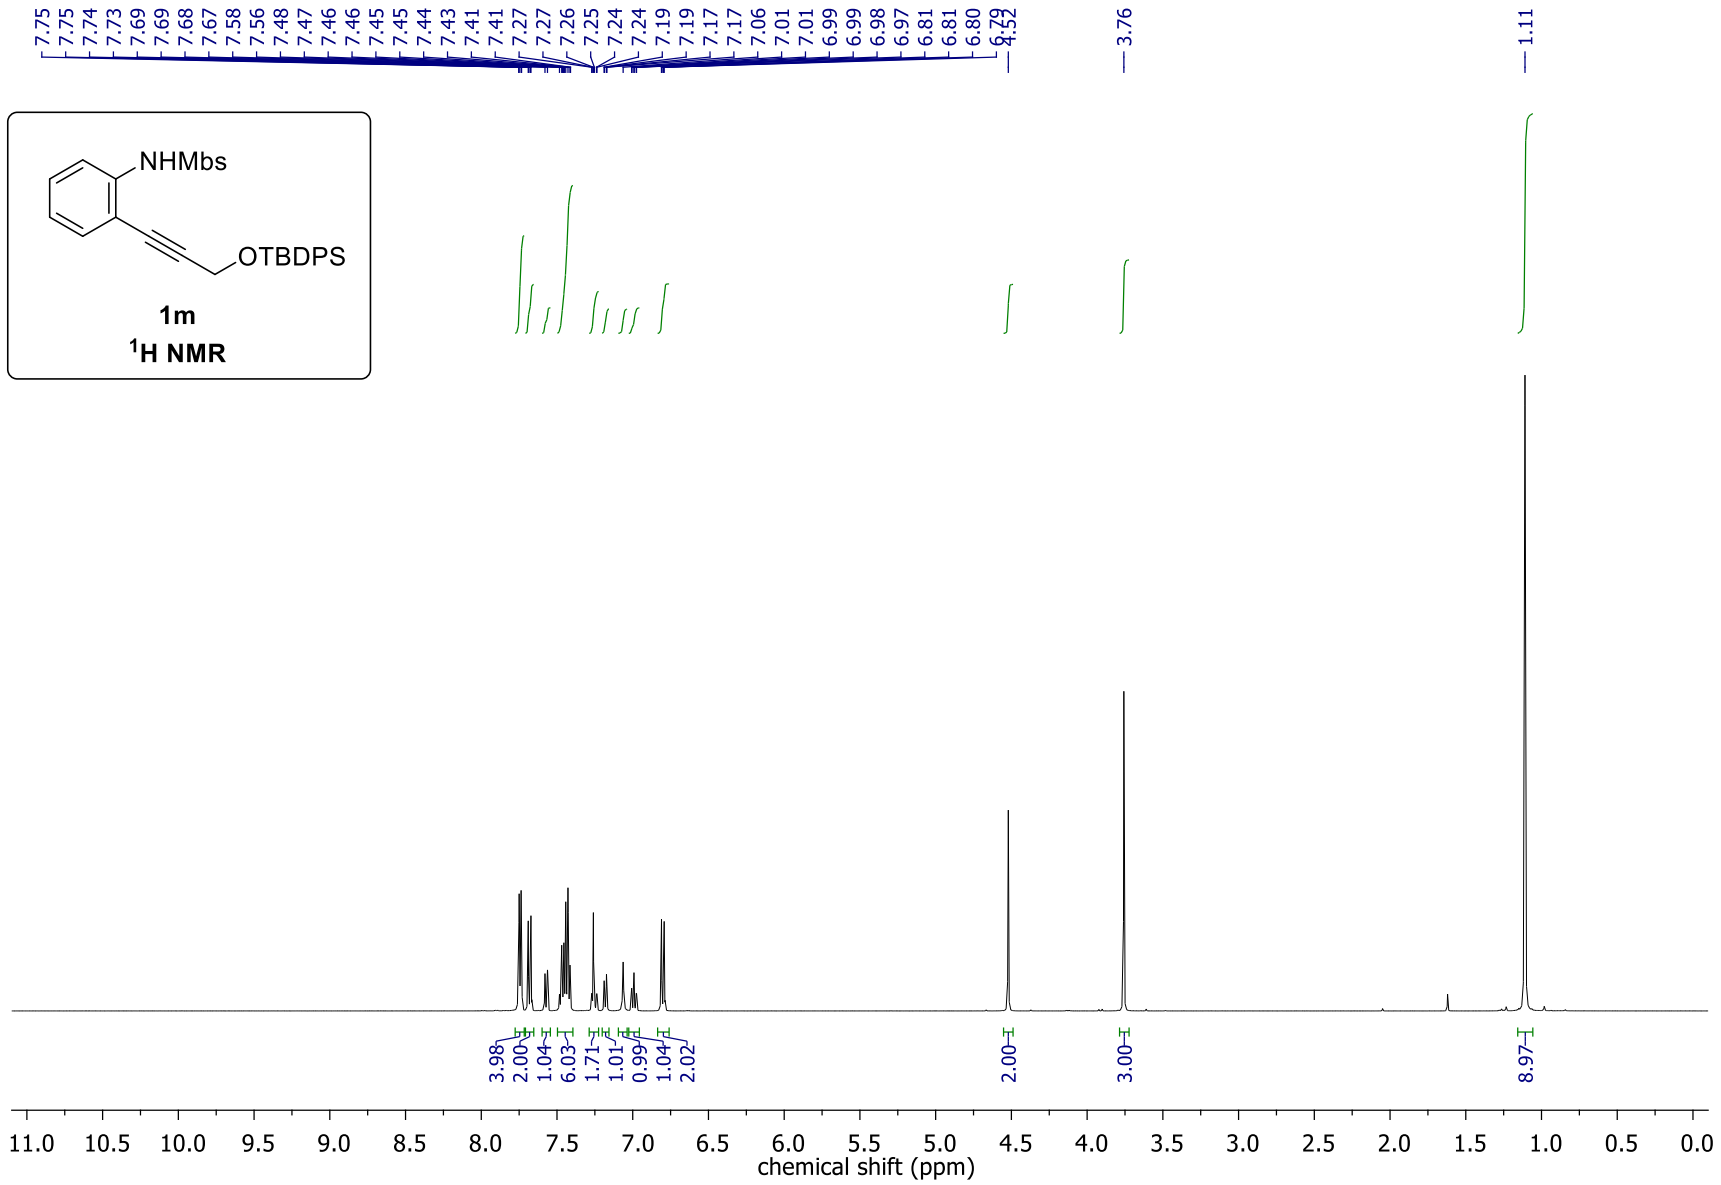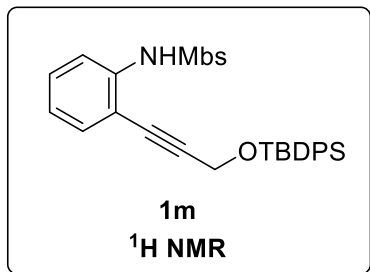

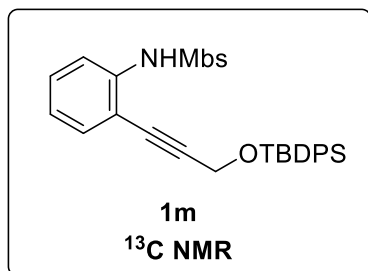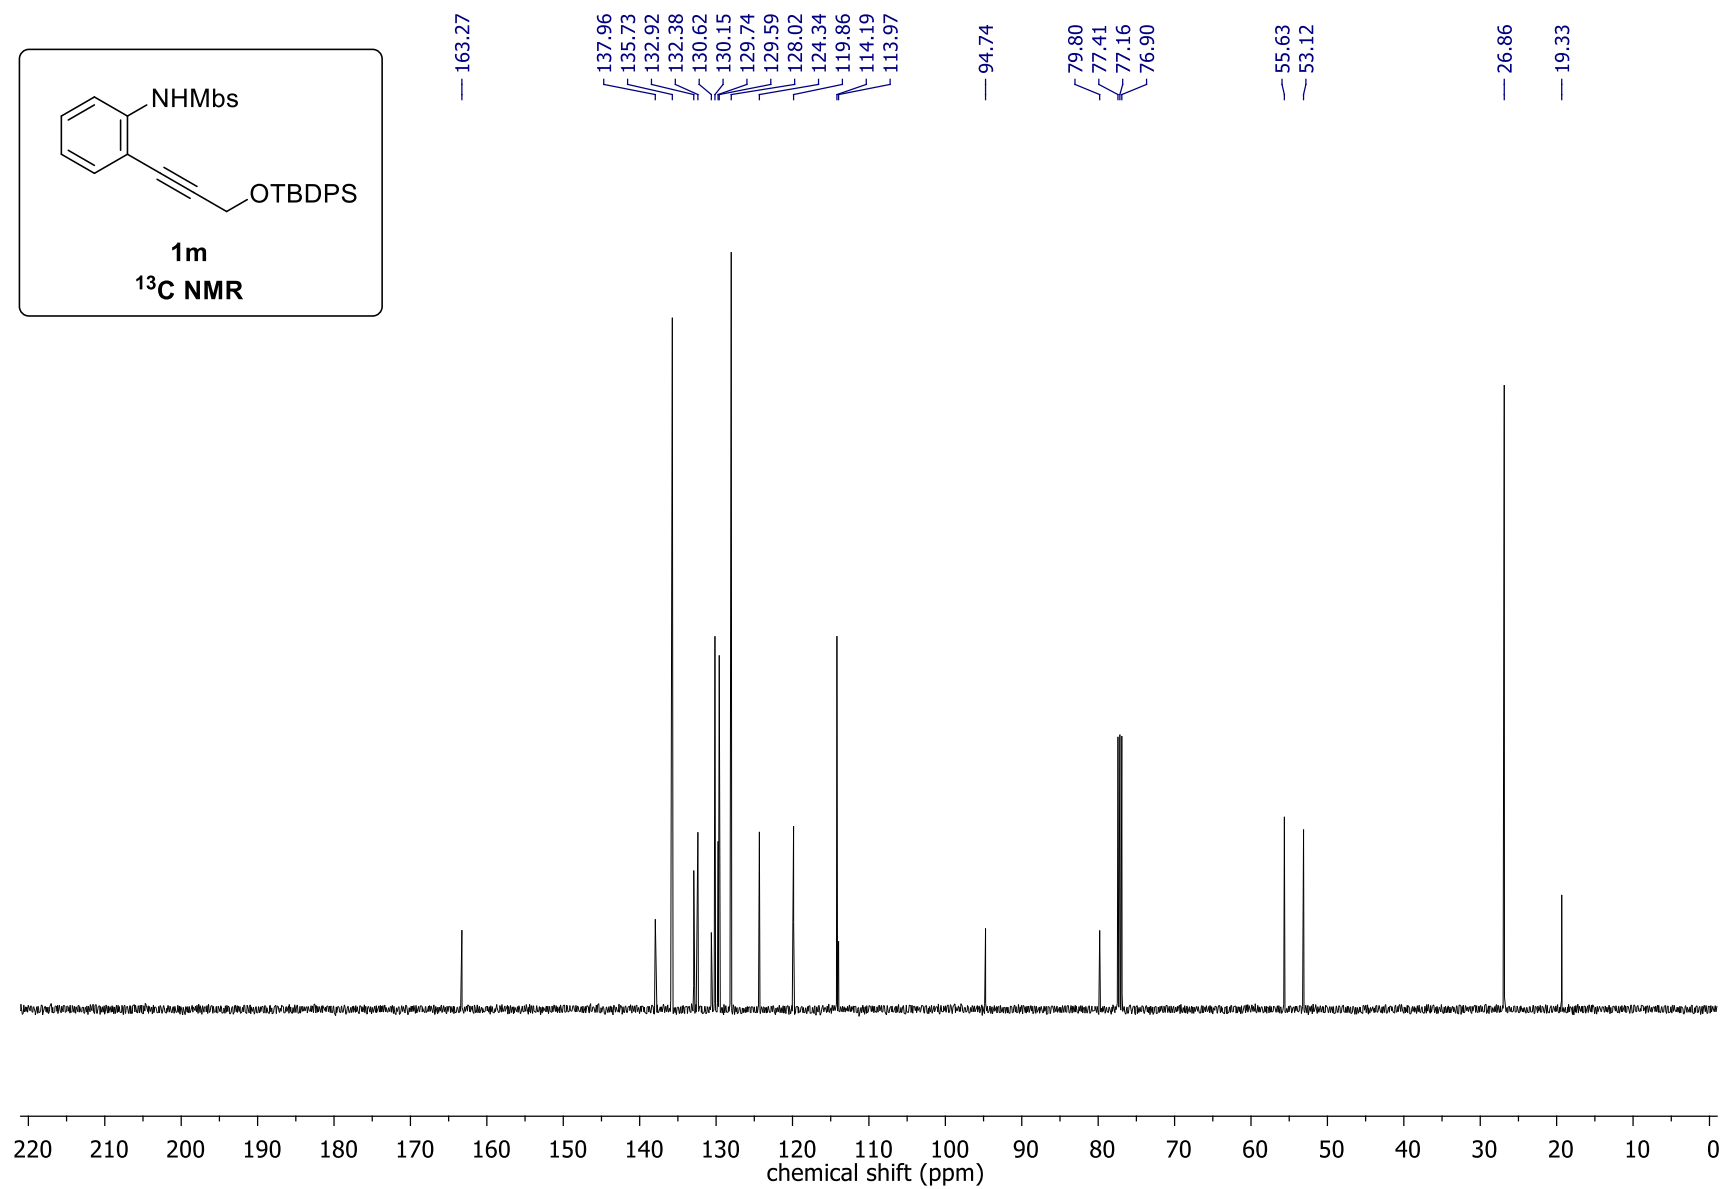



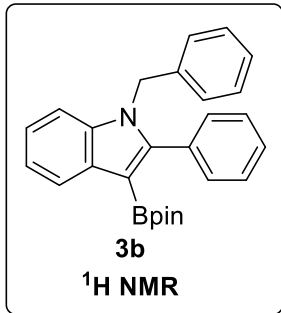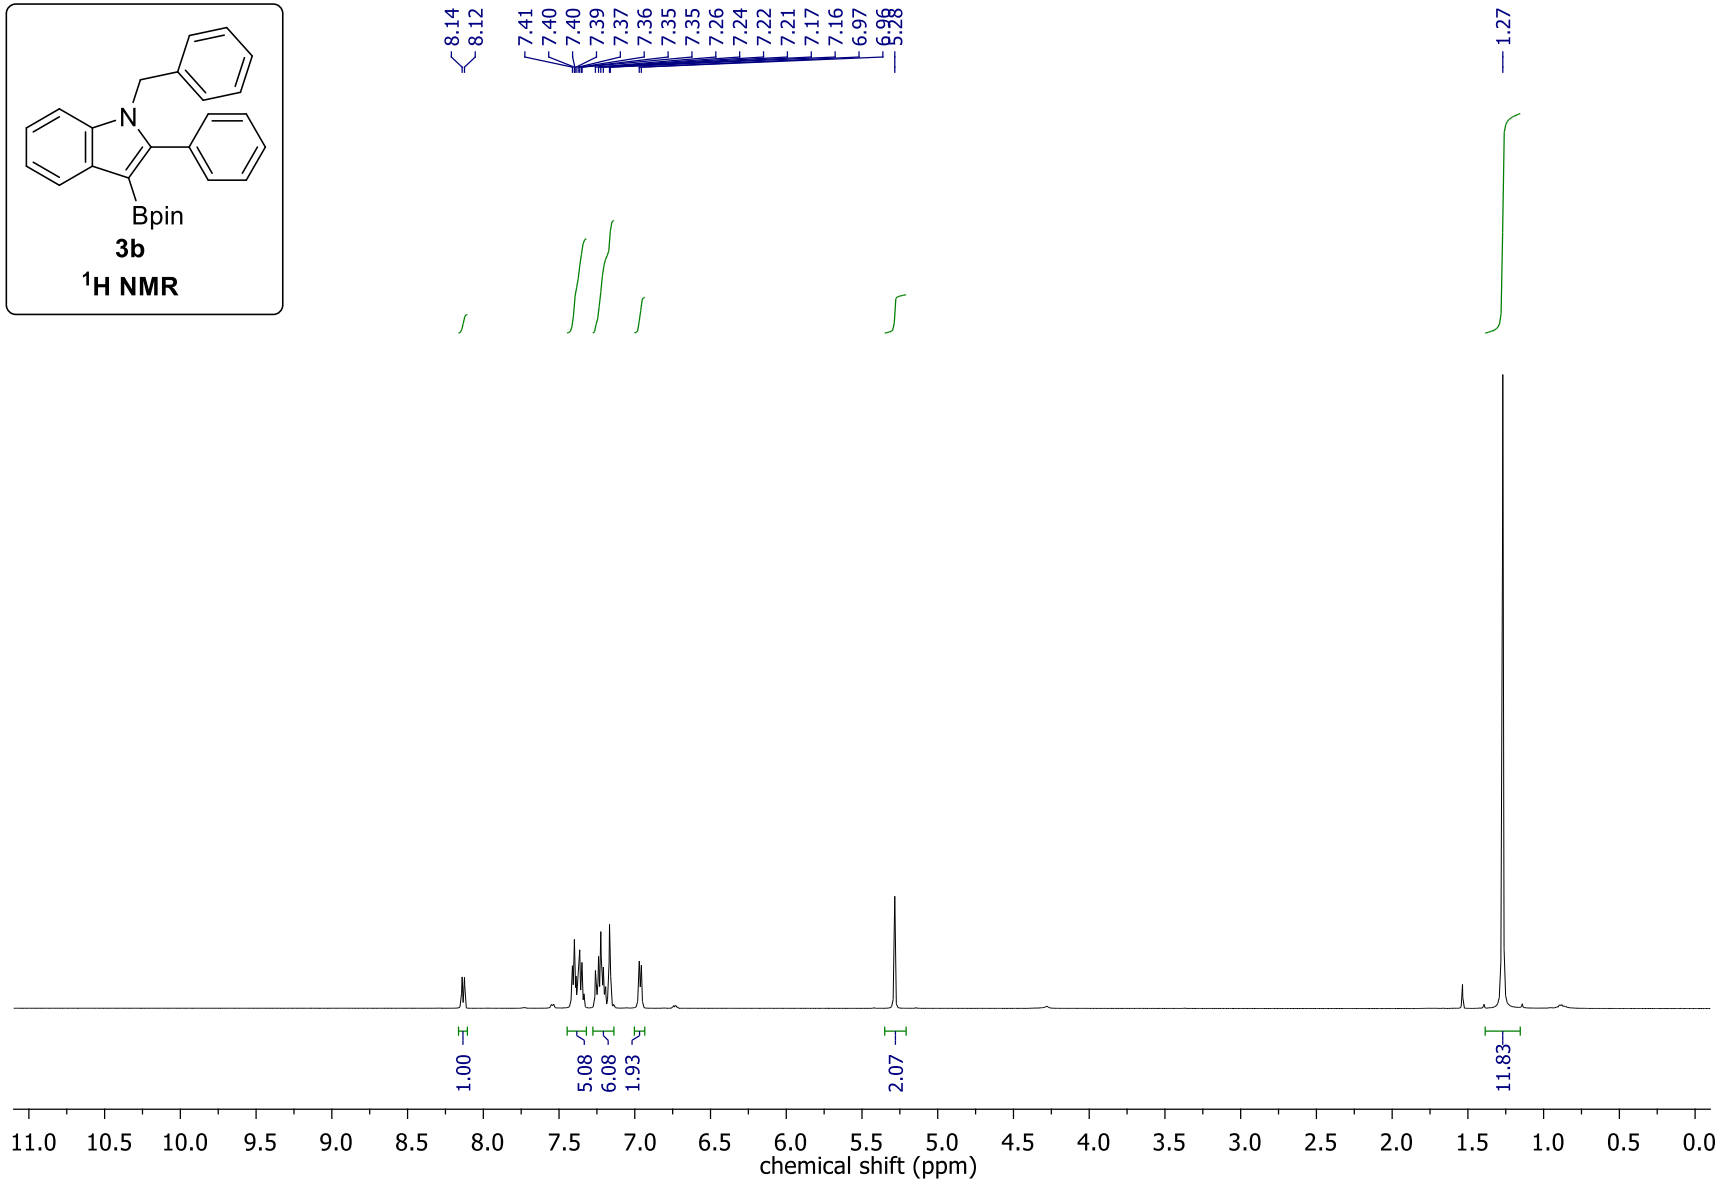

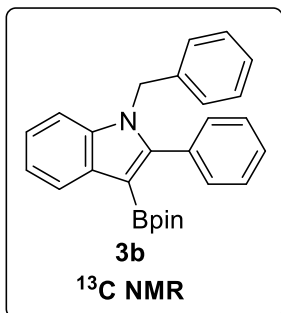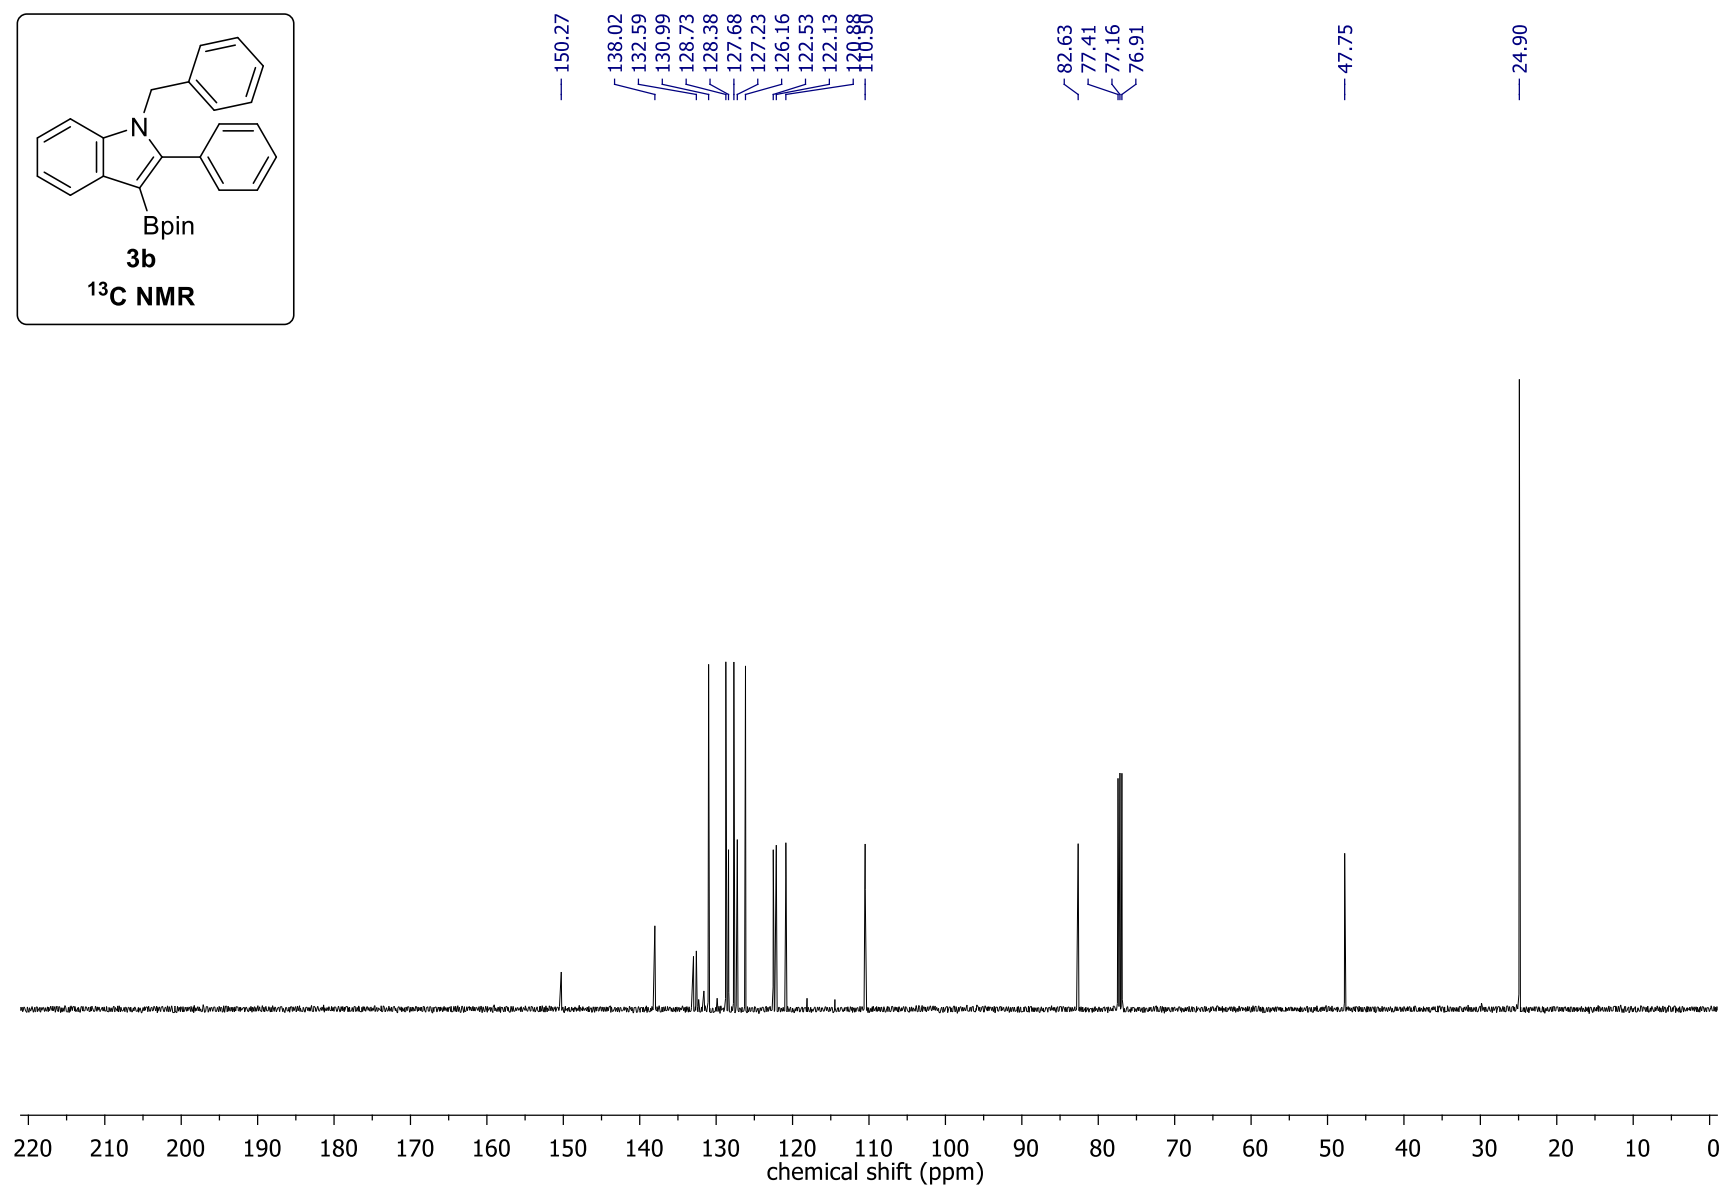

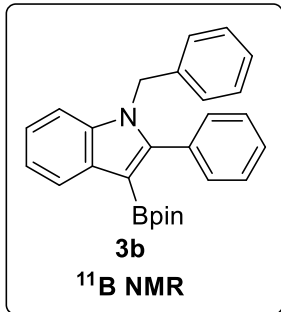

— 30.37

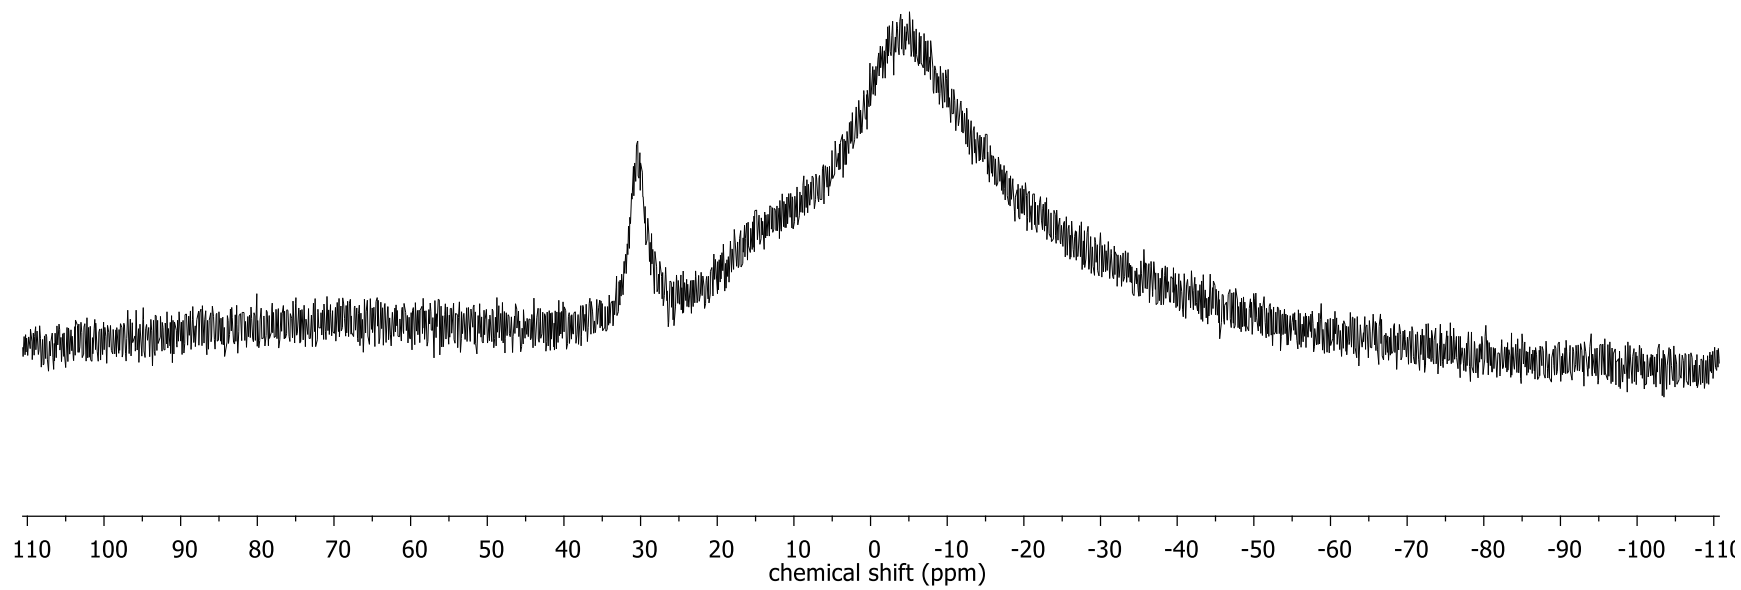

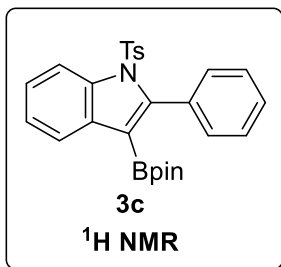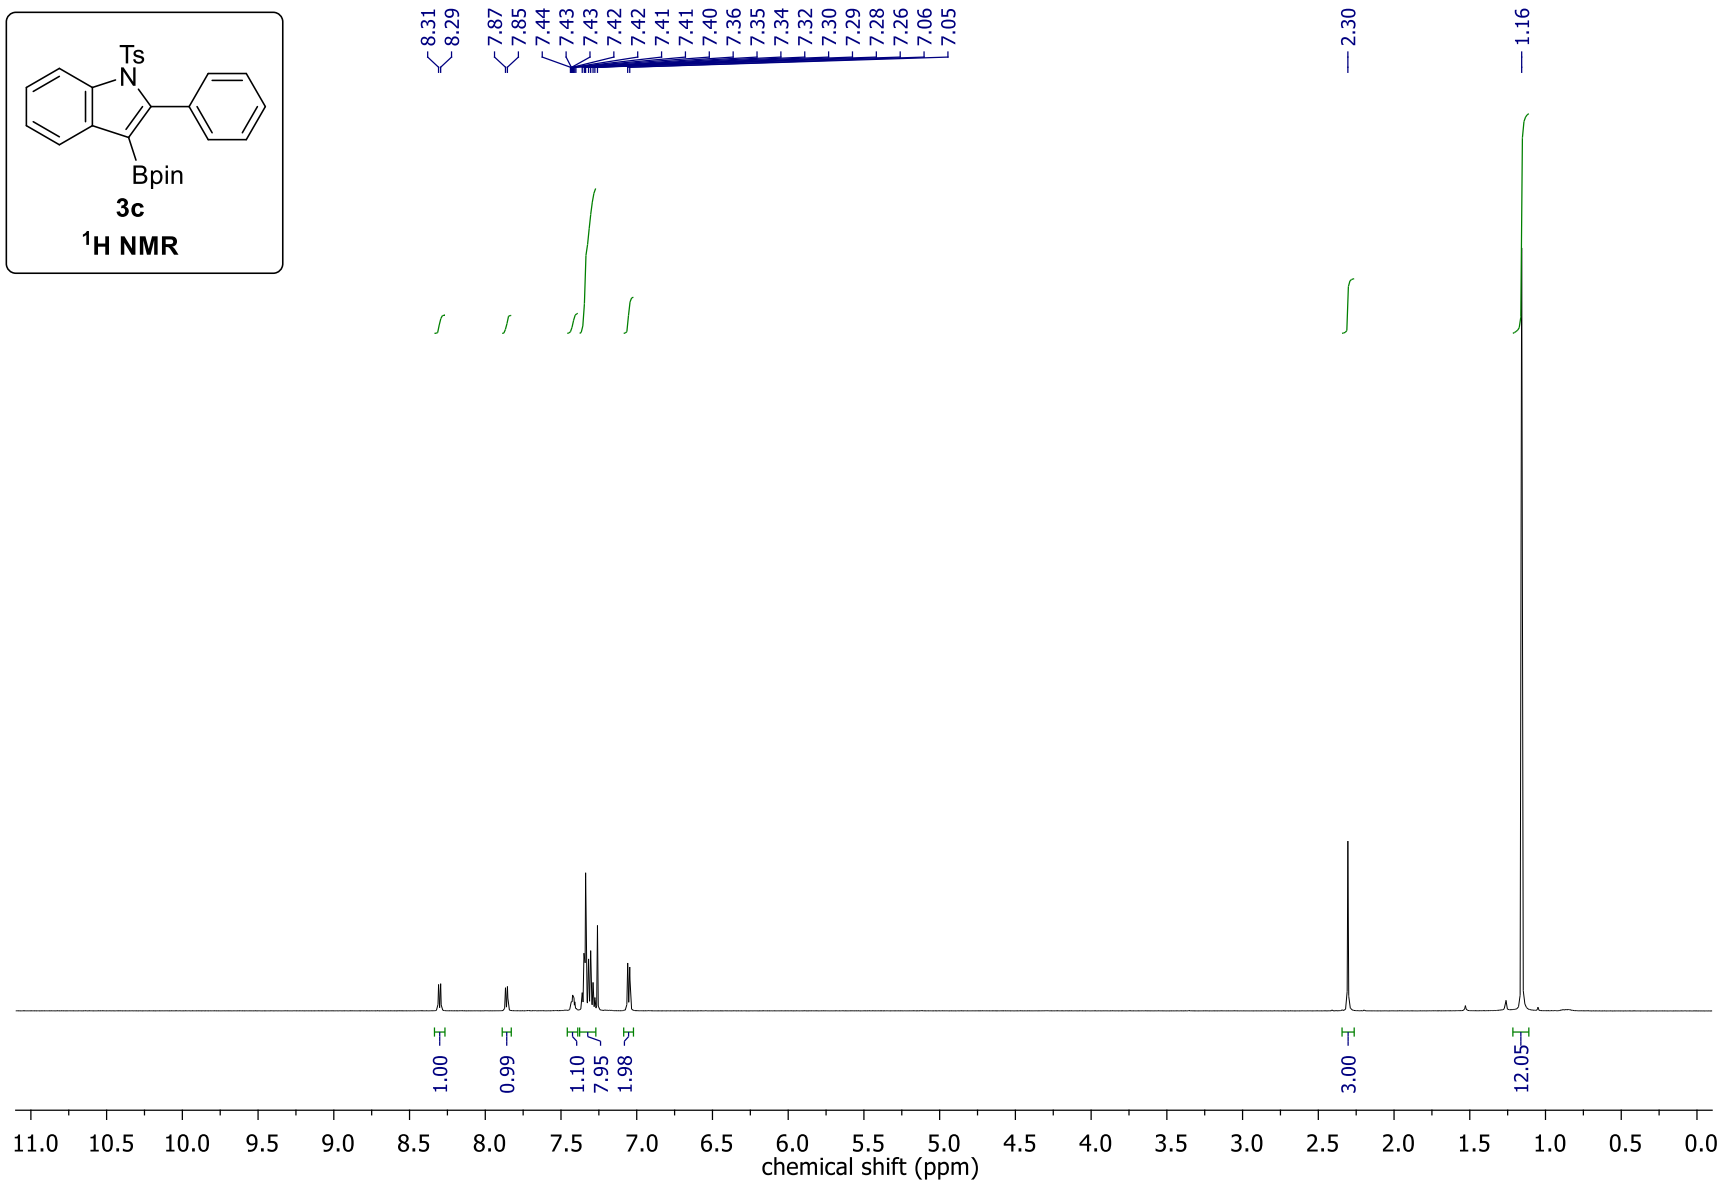

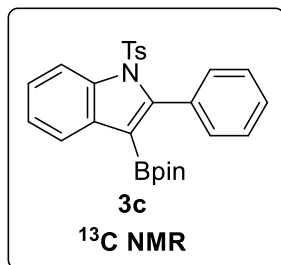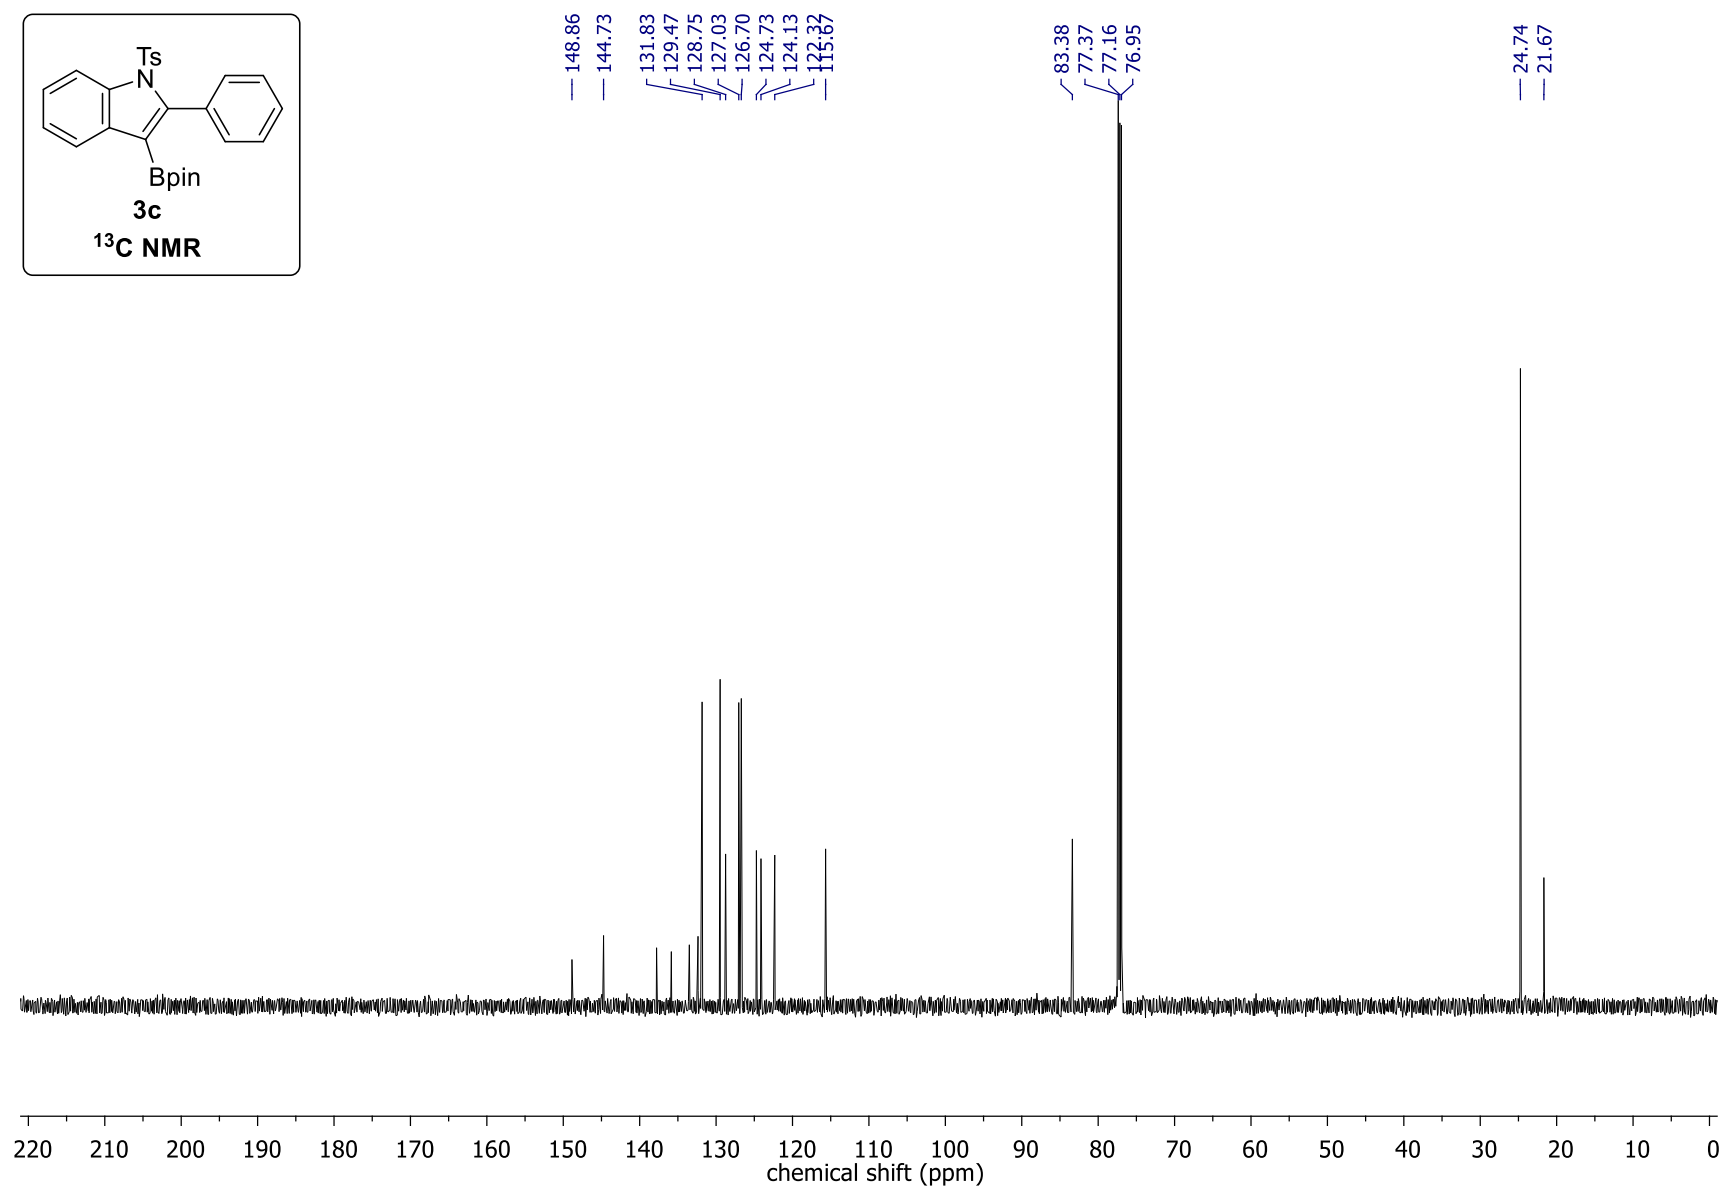

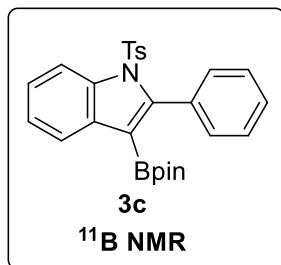

— 29.81

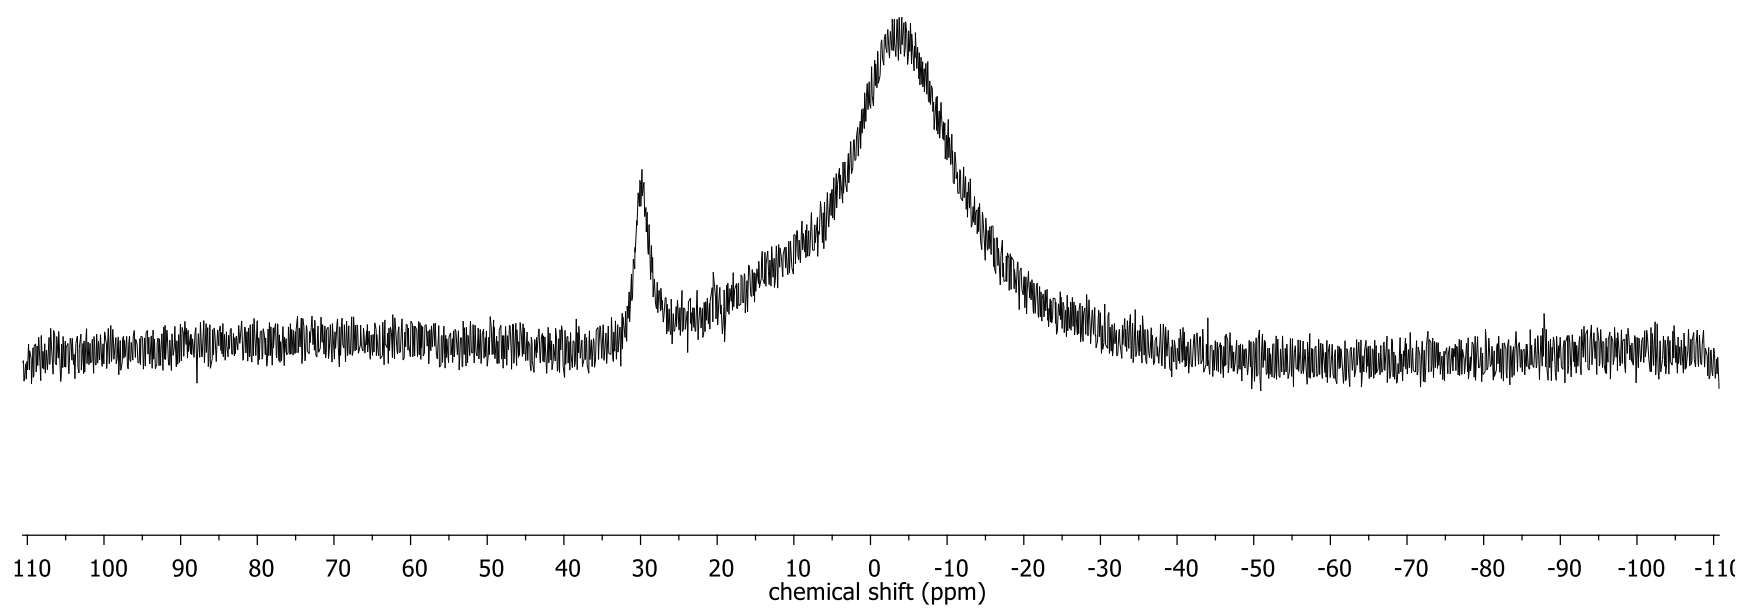

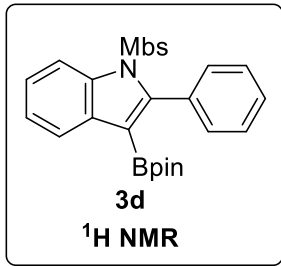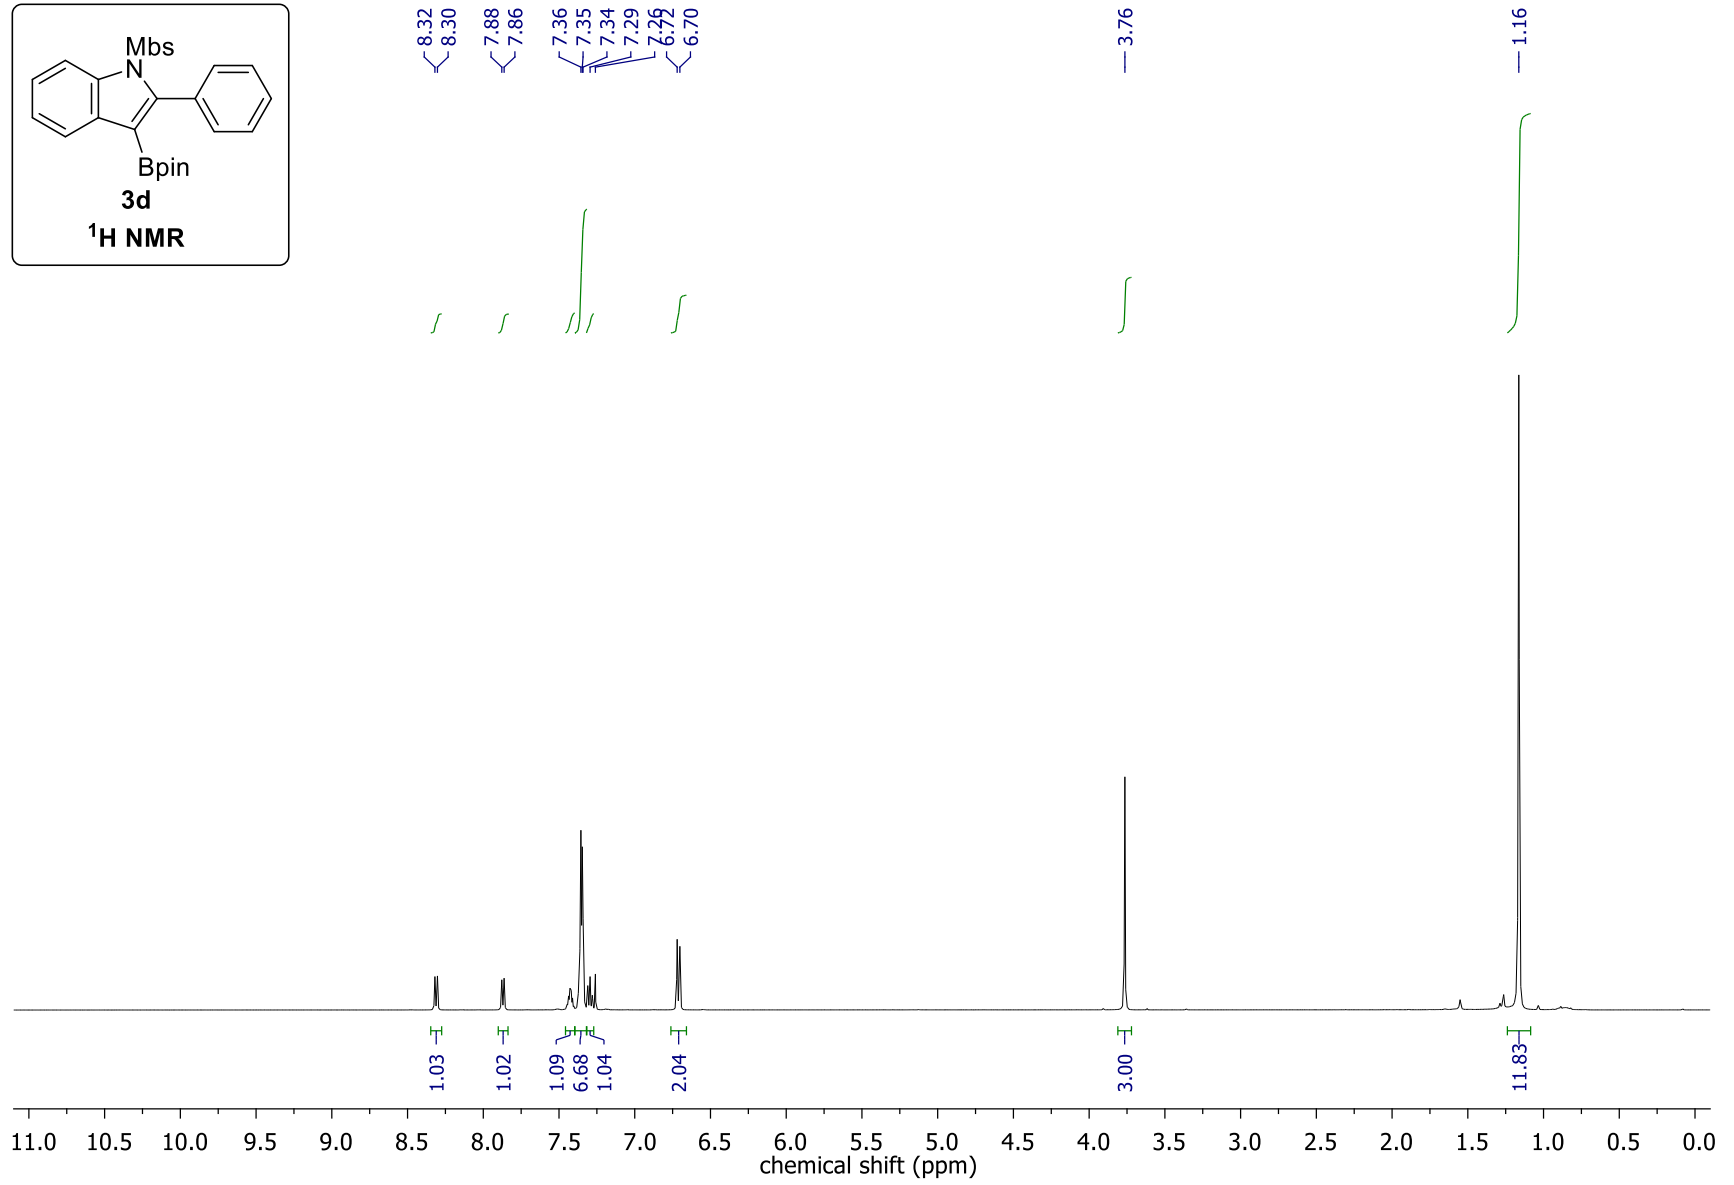

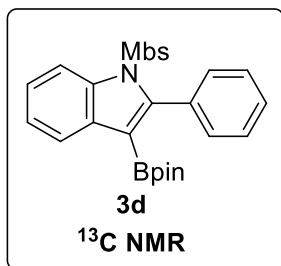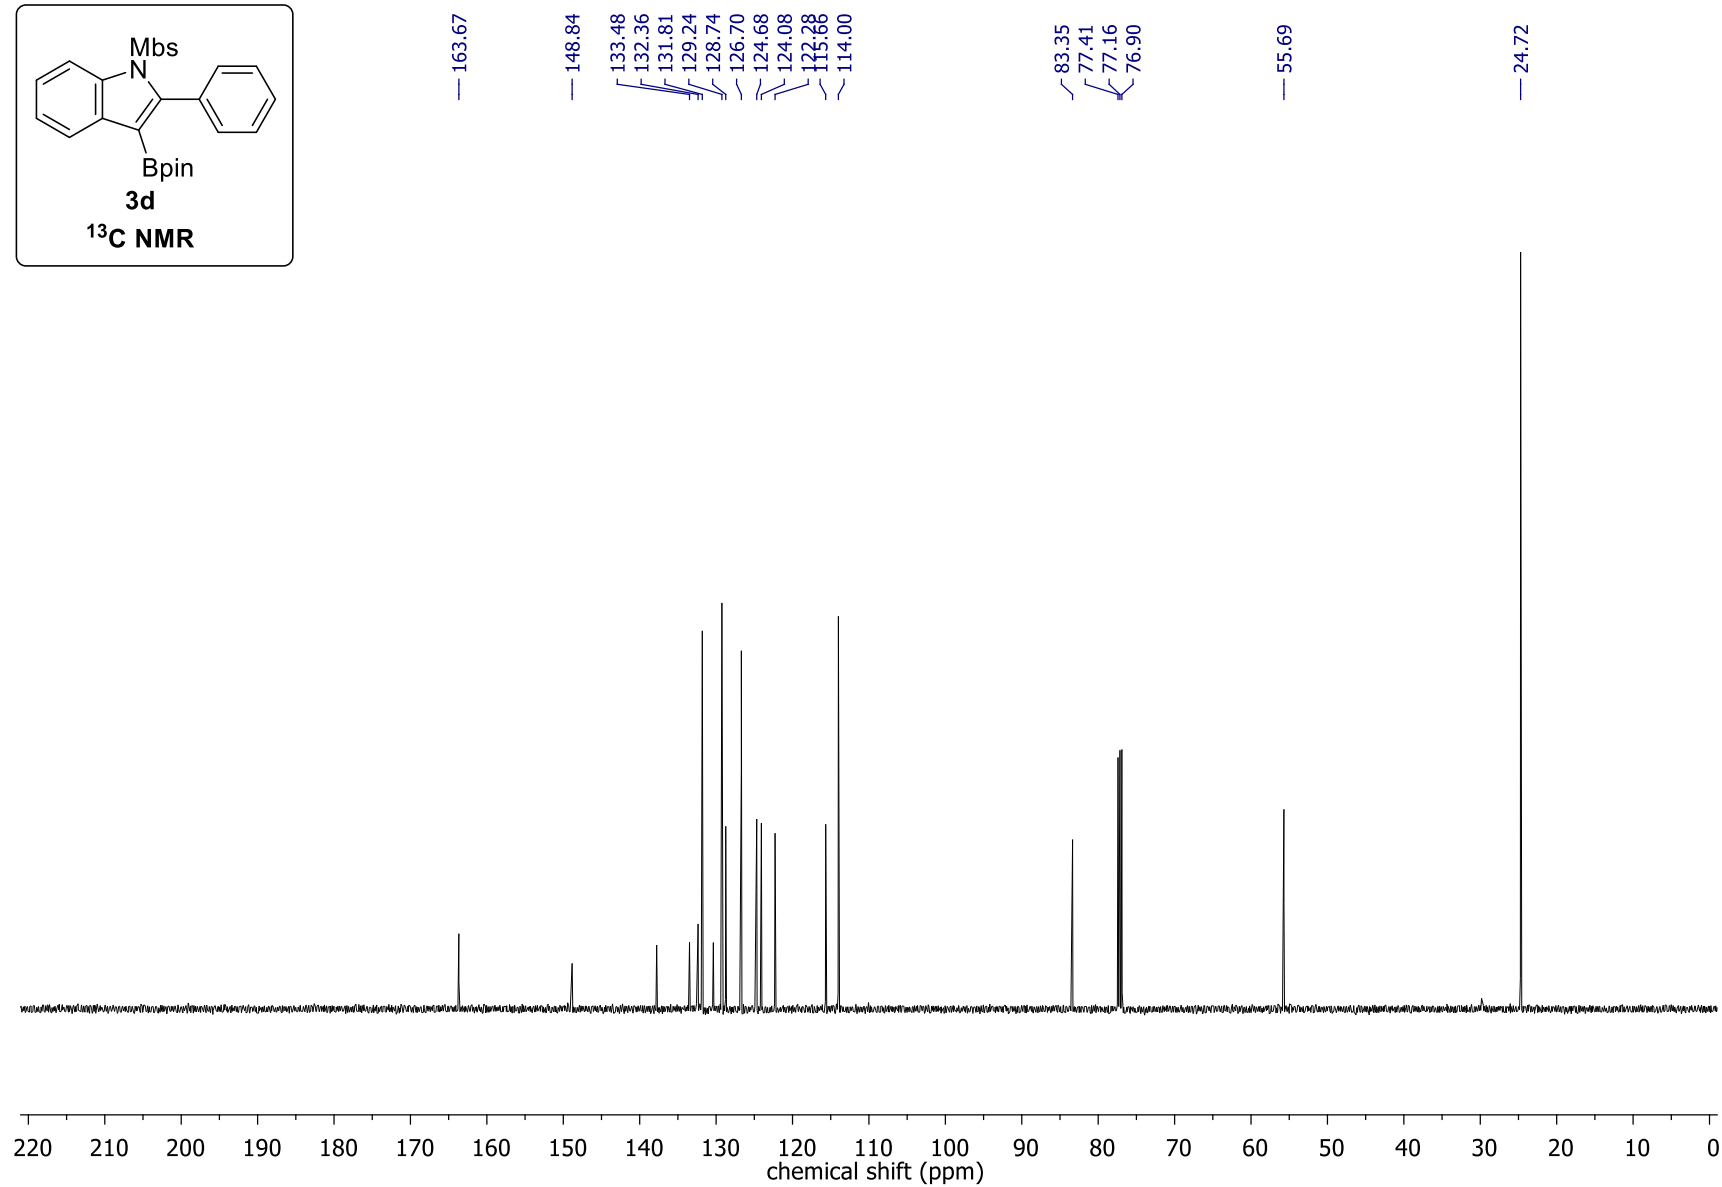



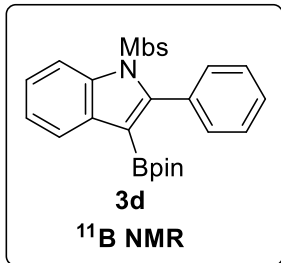

— 30.09

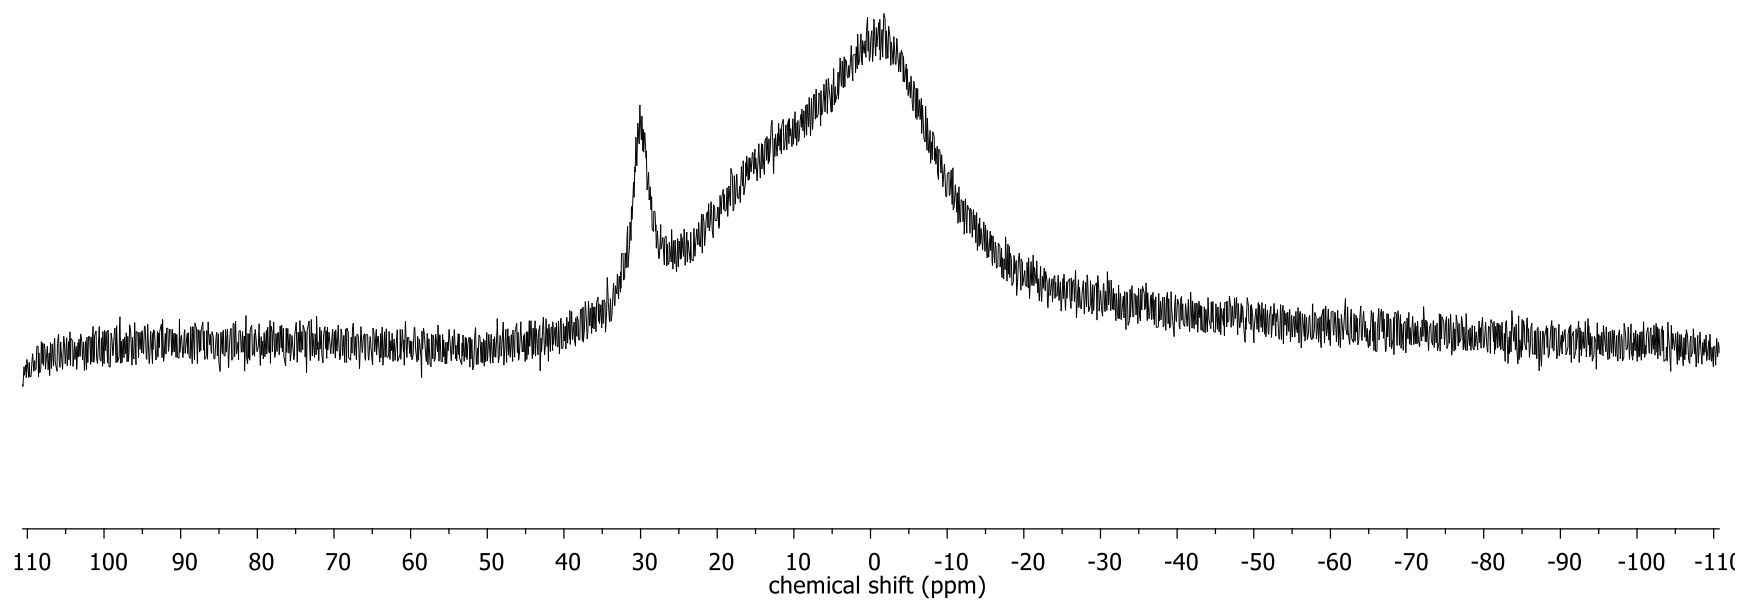

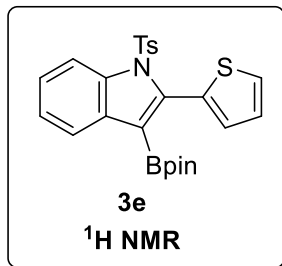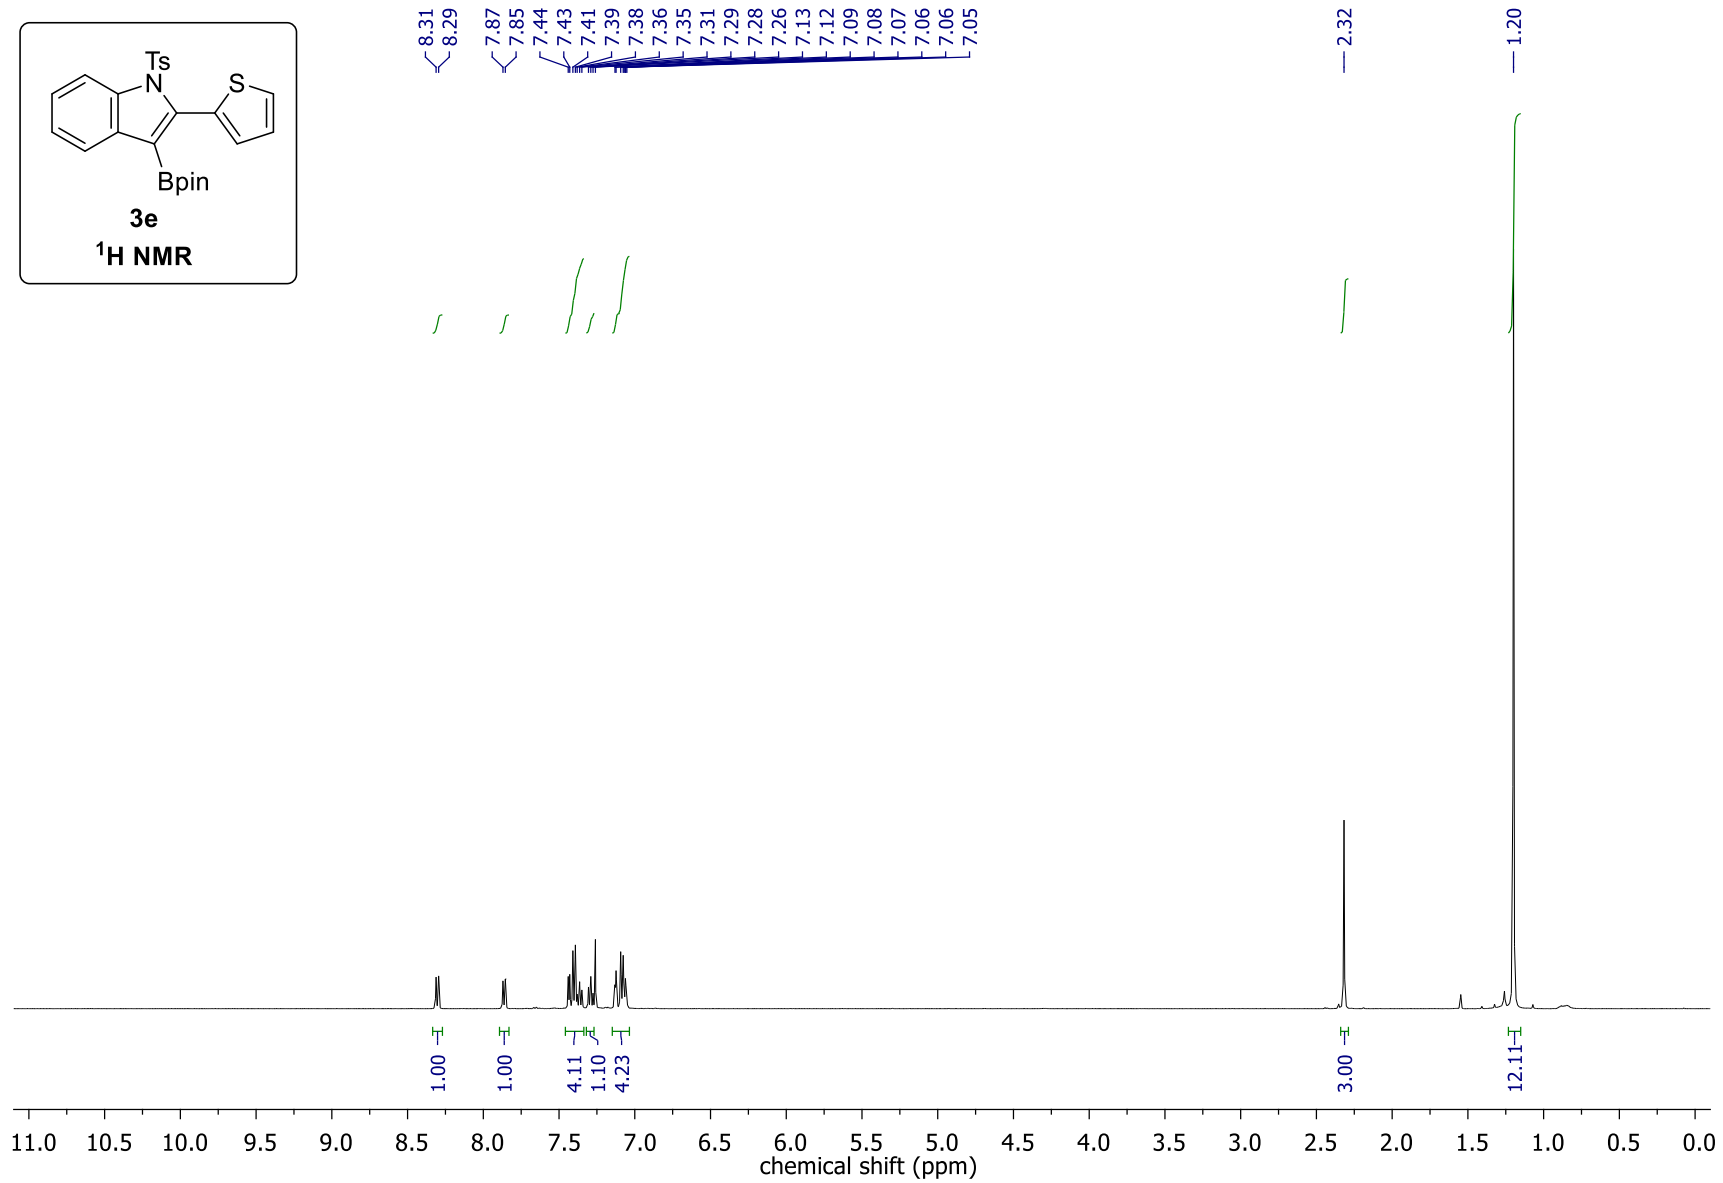

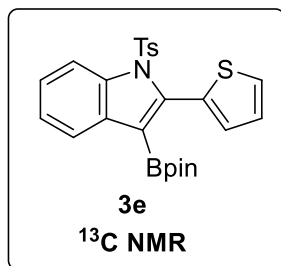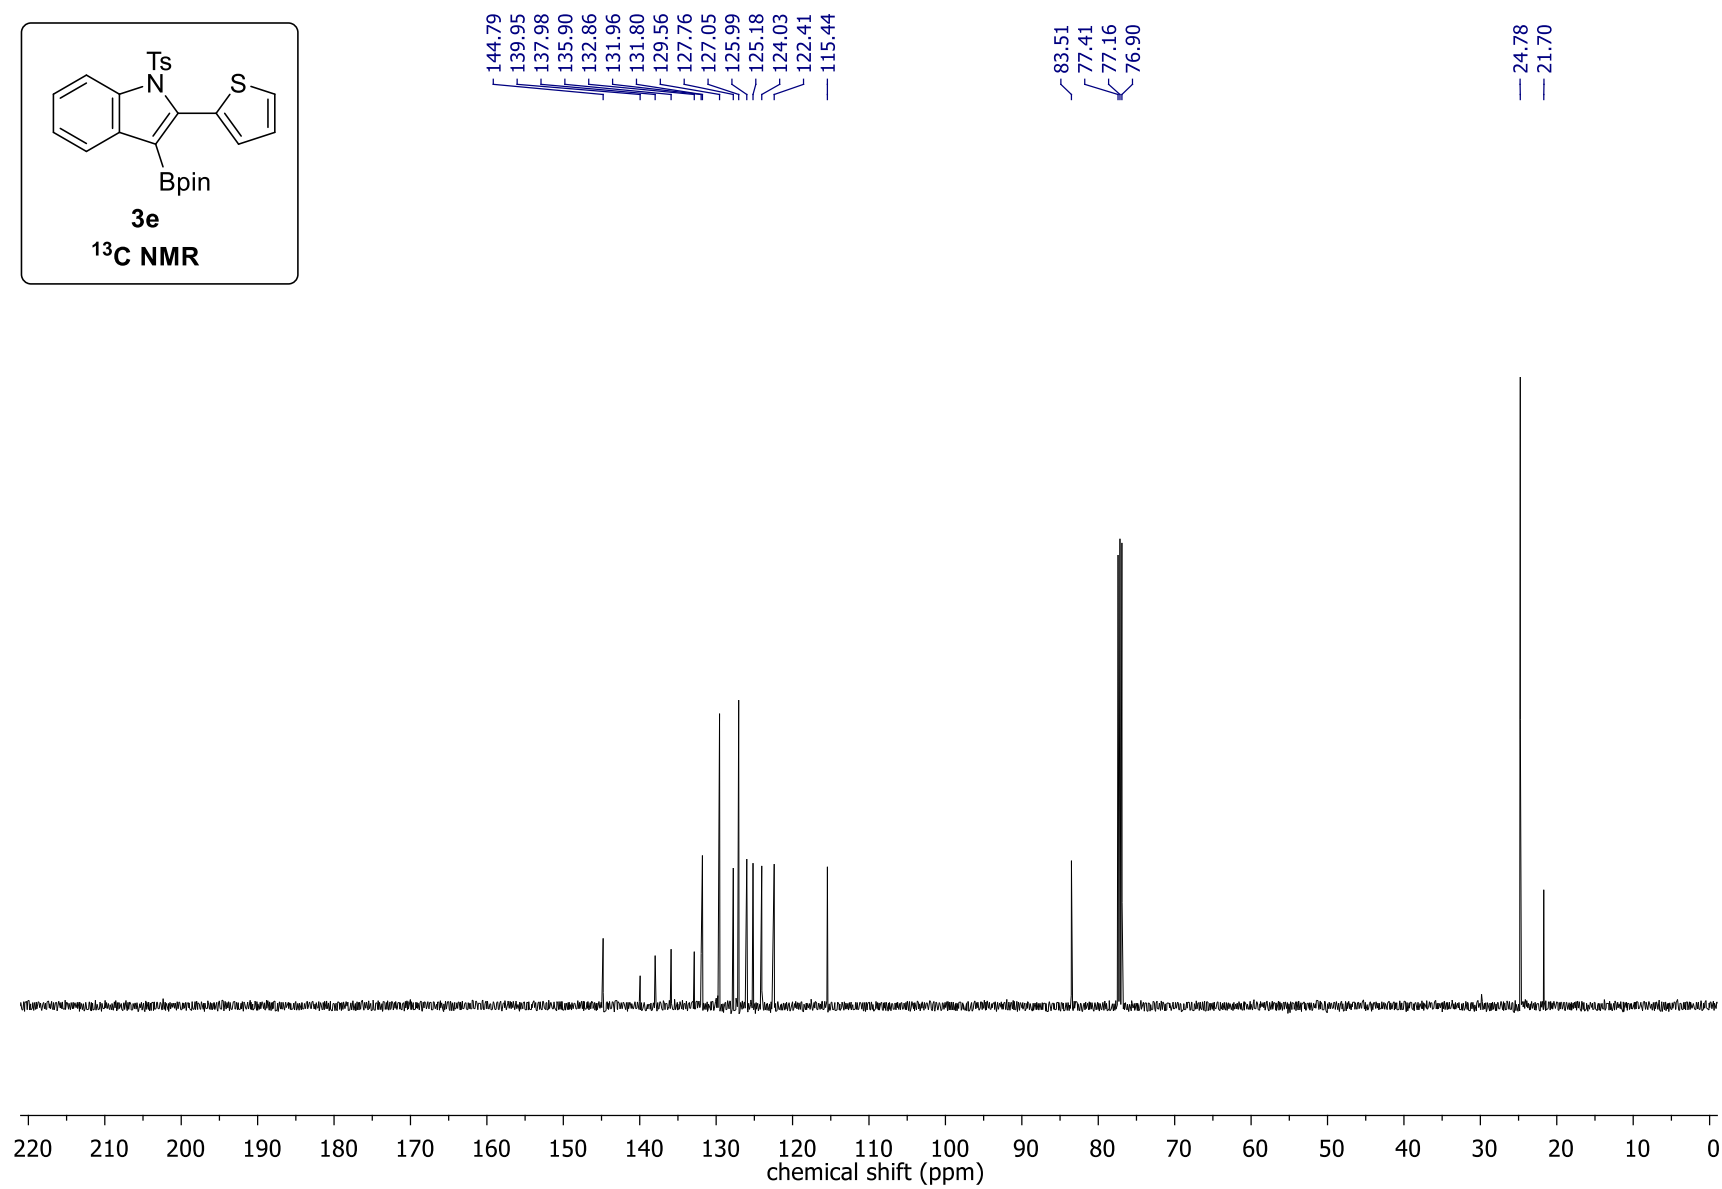

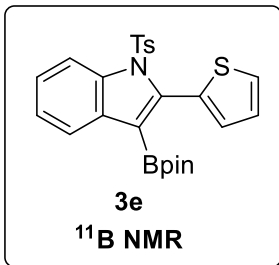

— 29.90

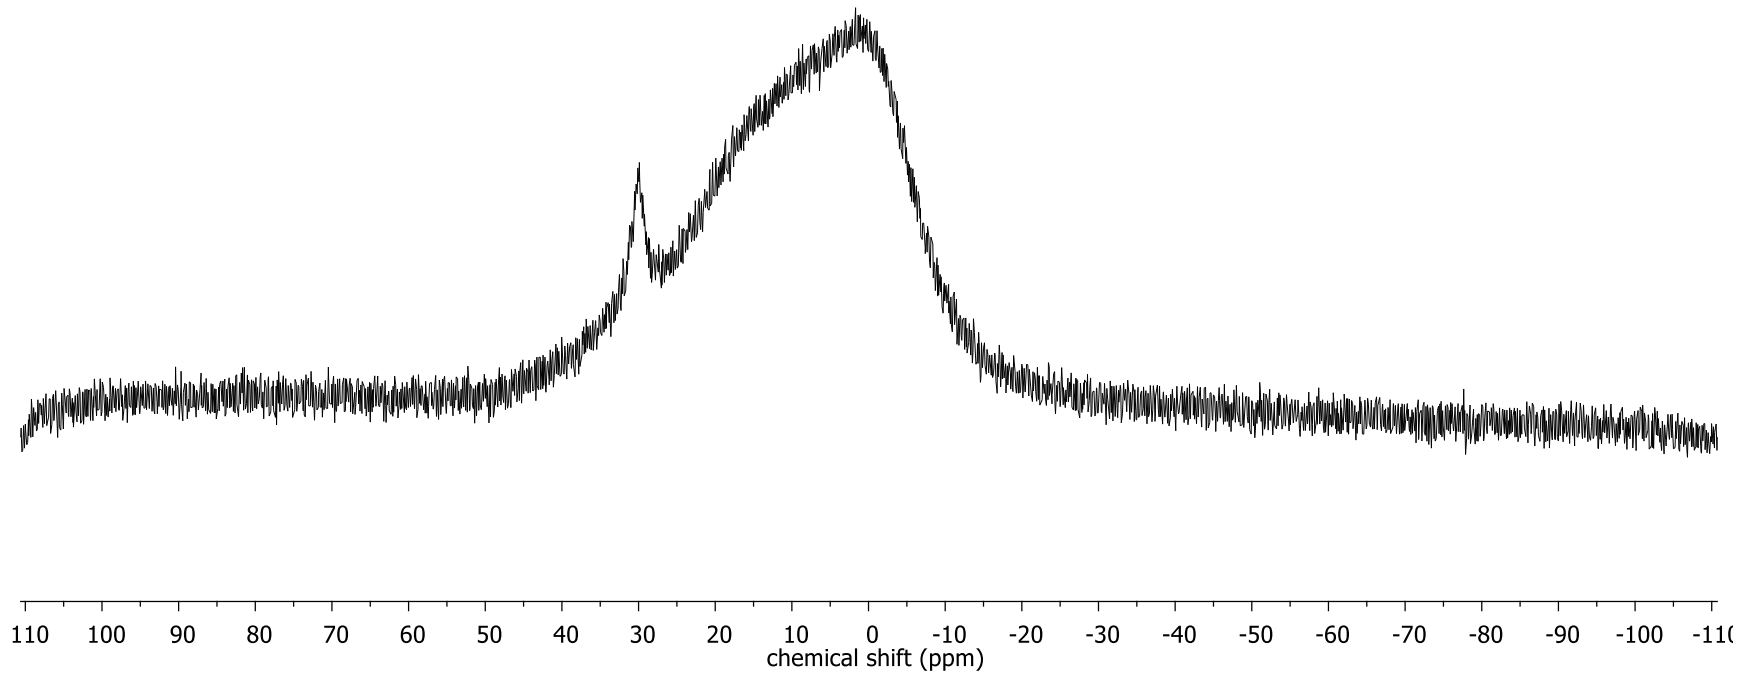

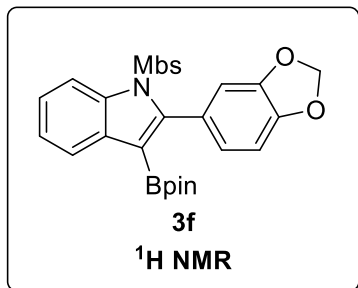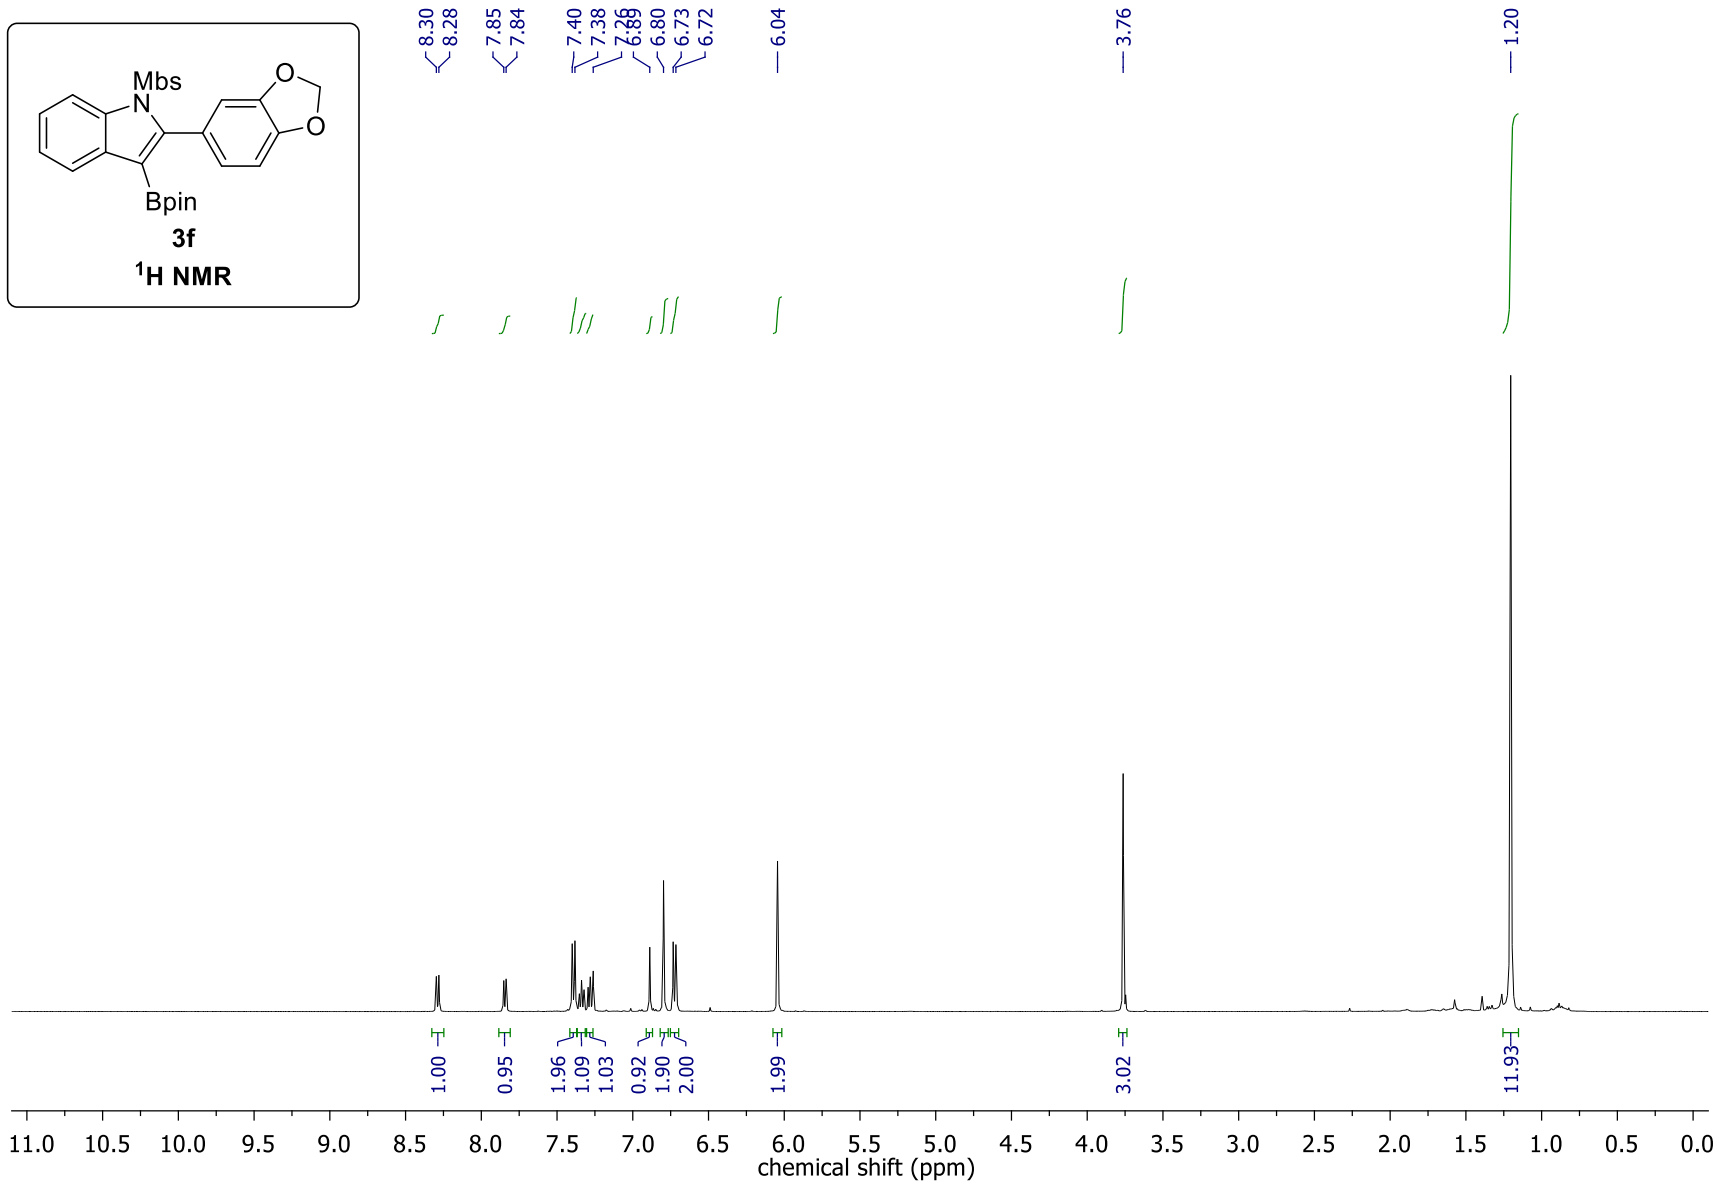

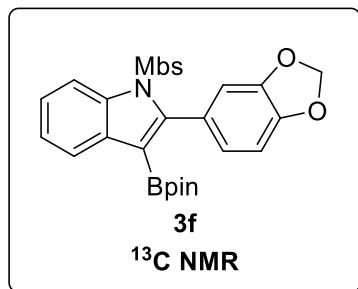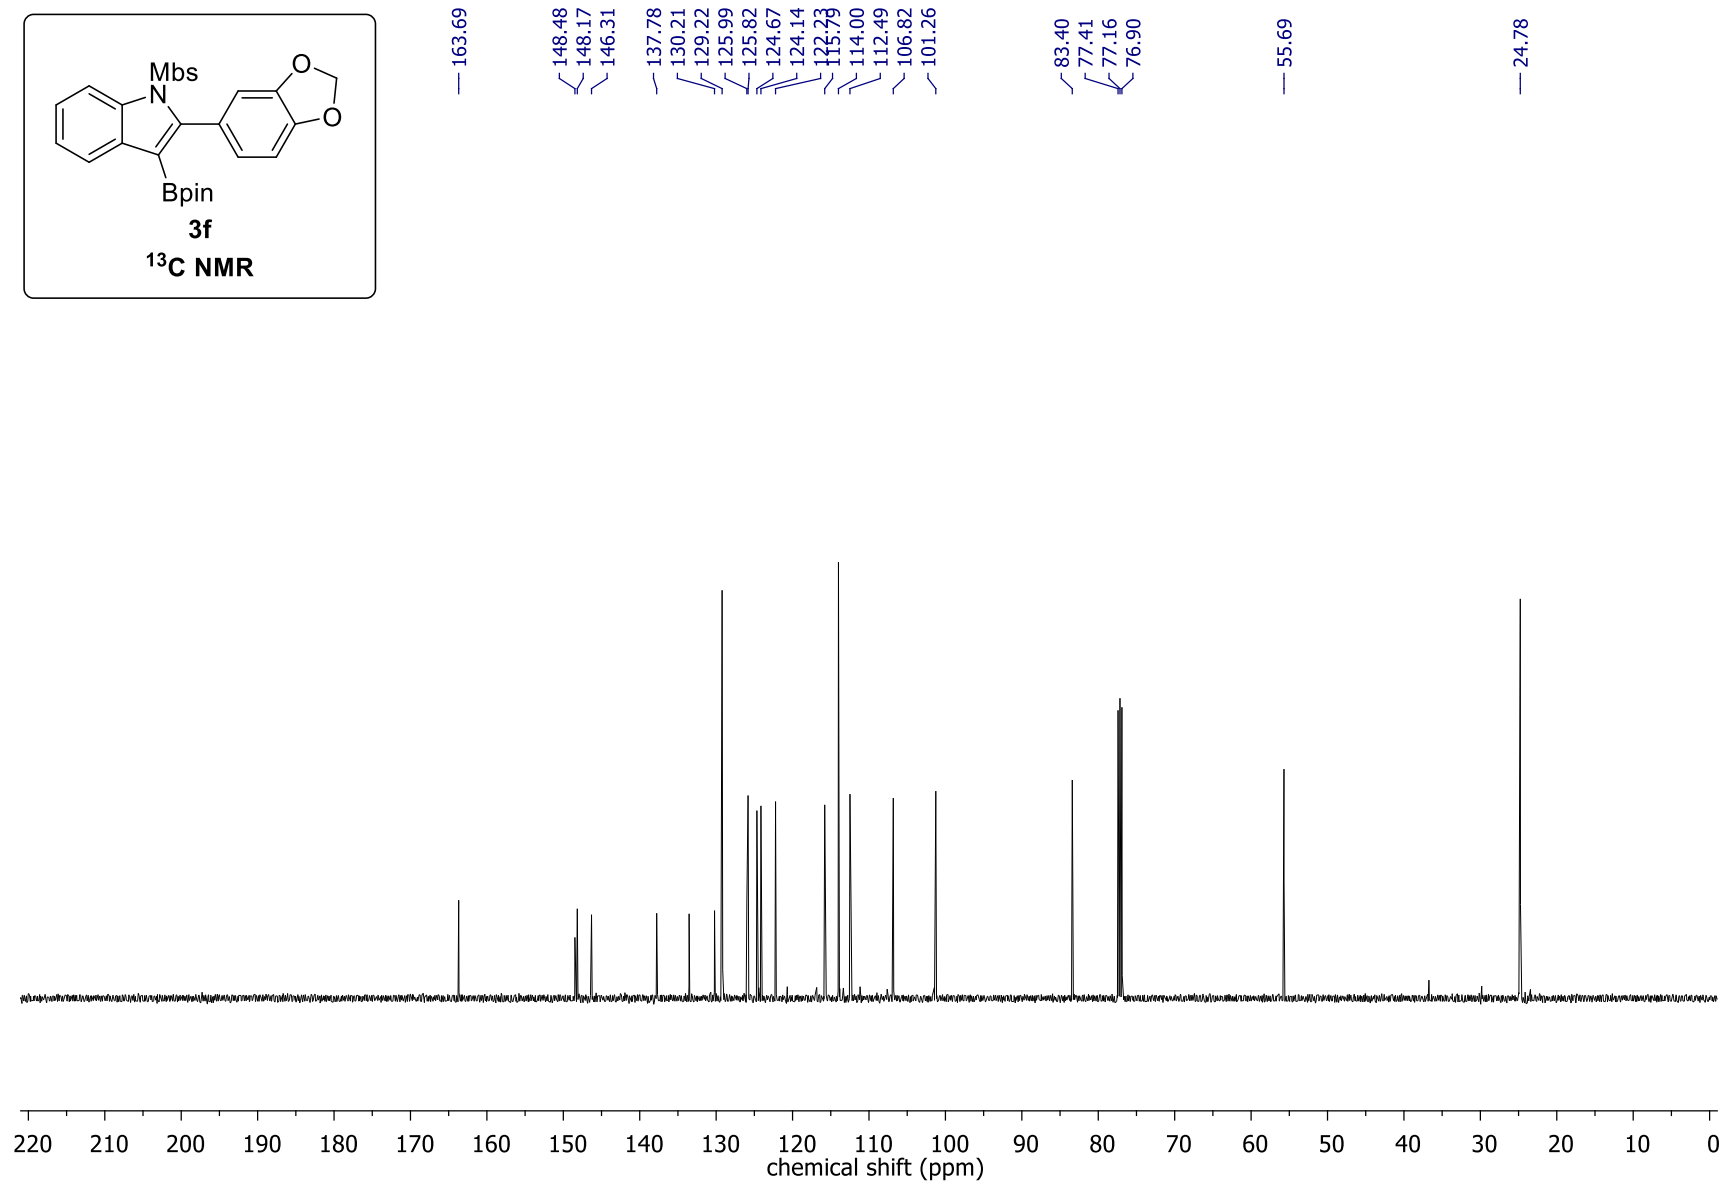

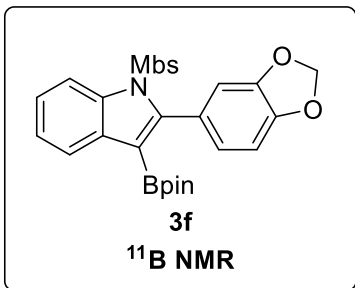

— 30.14

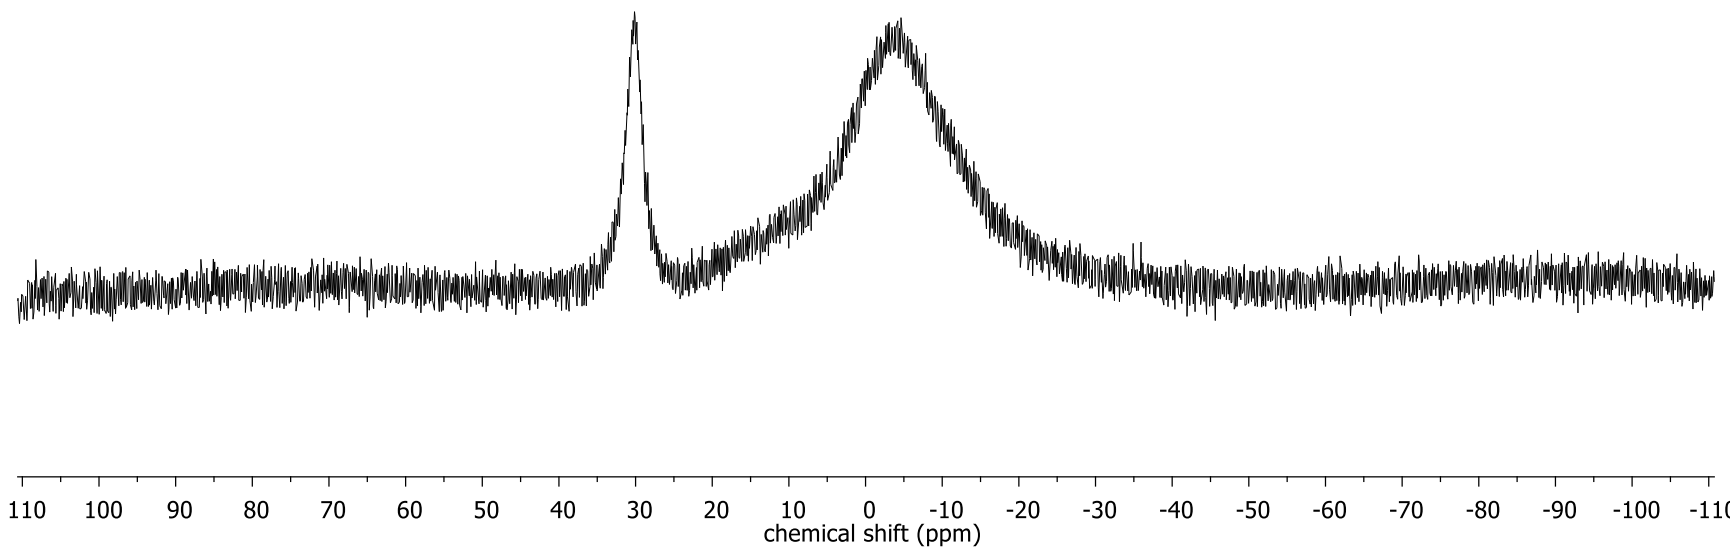

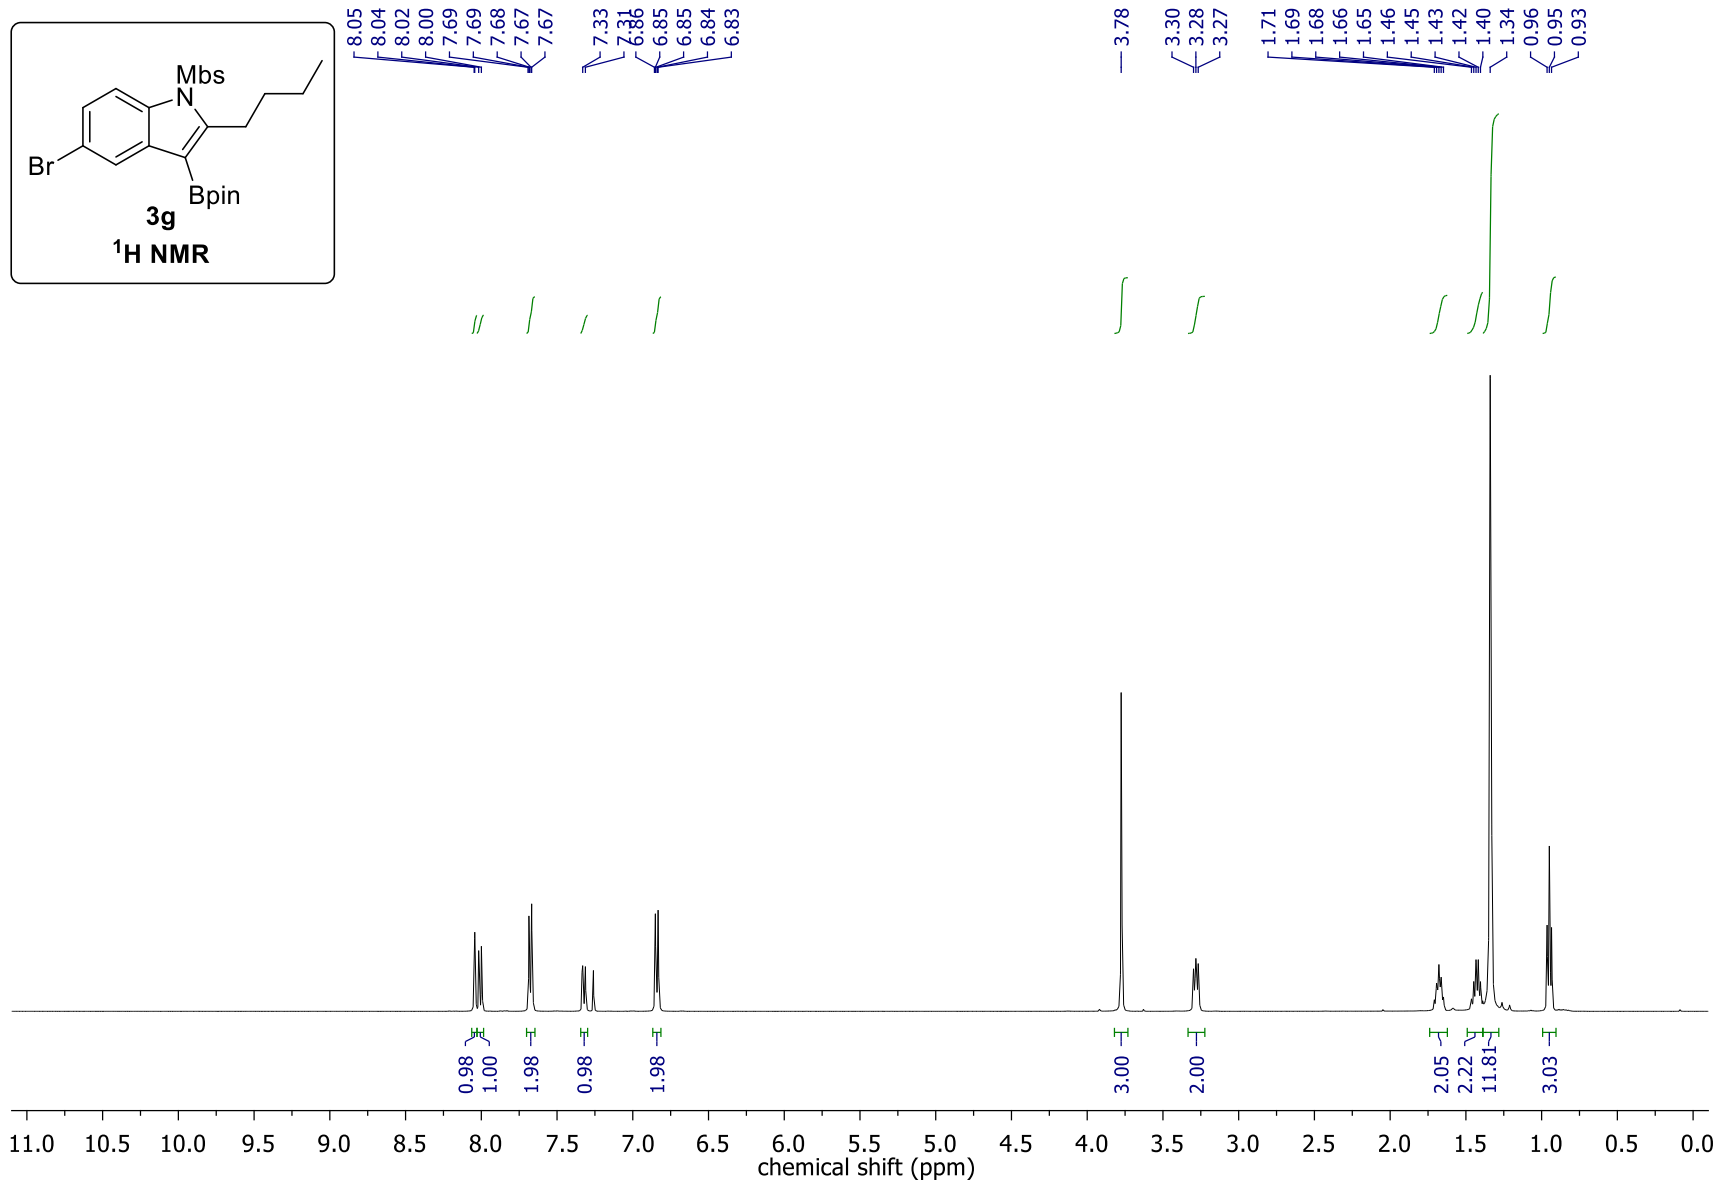



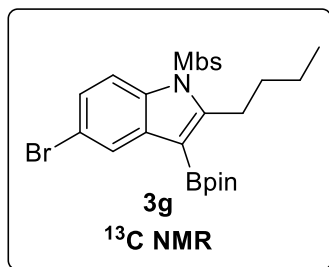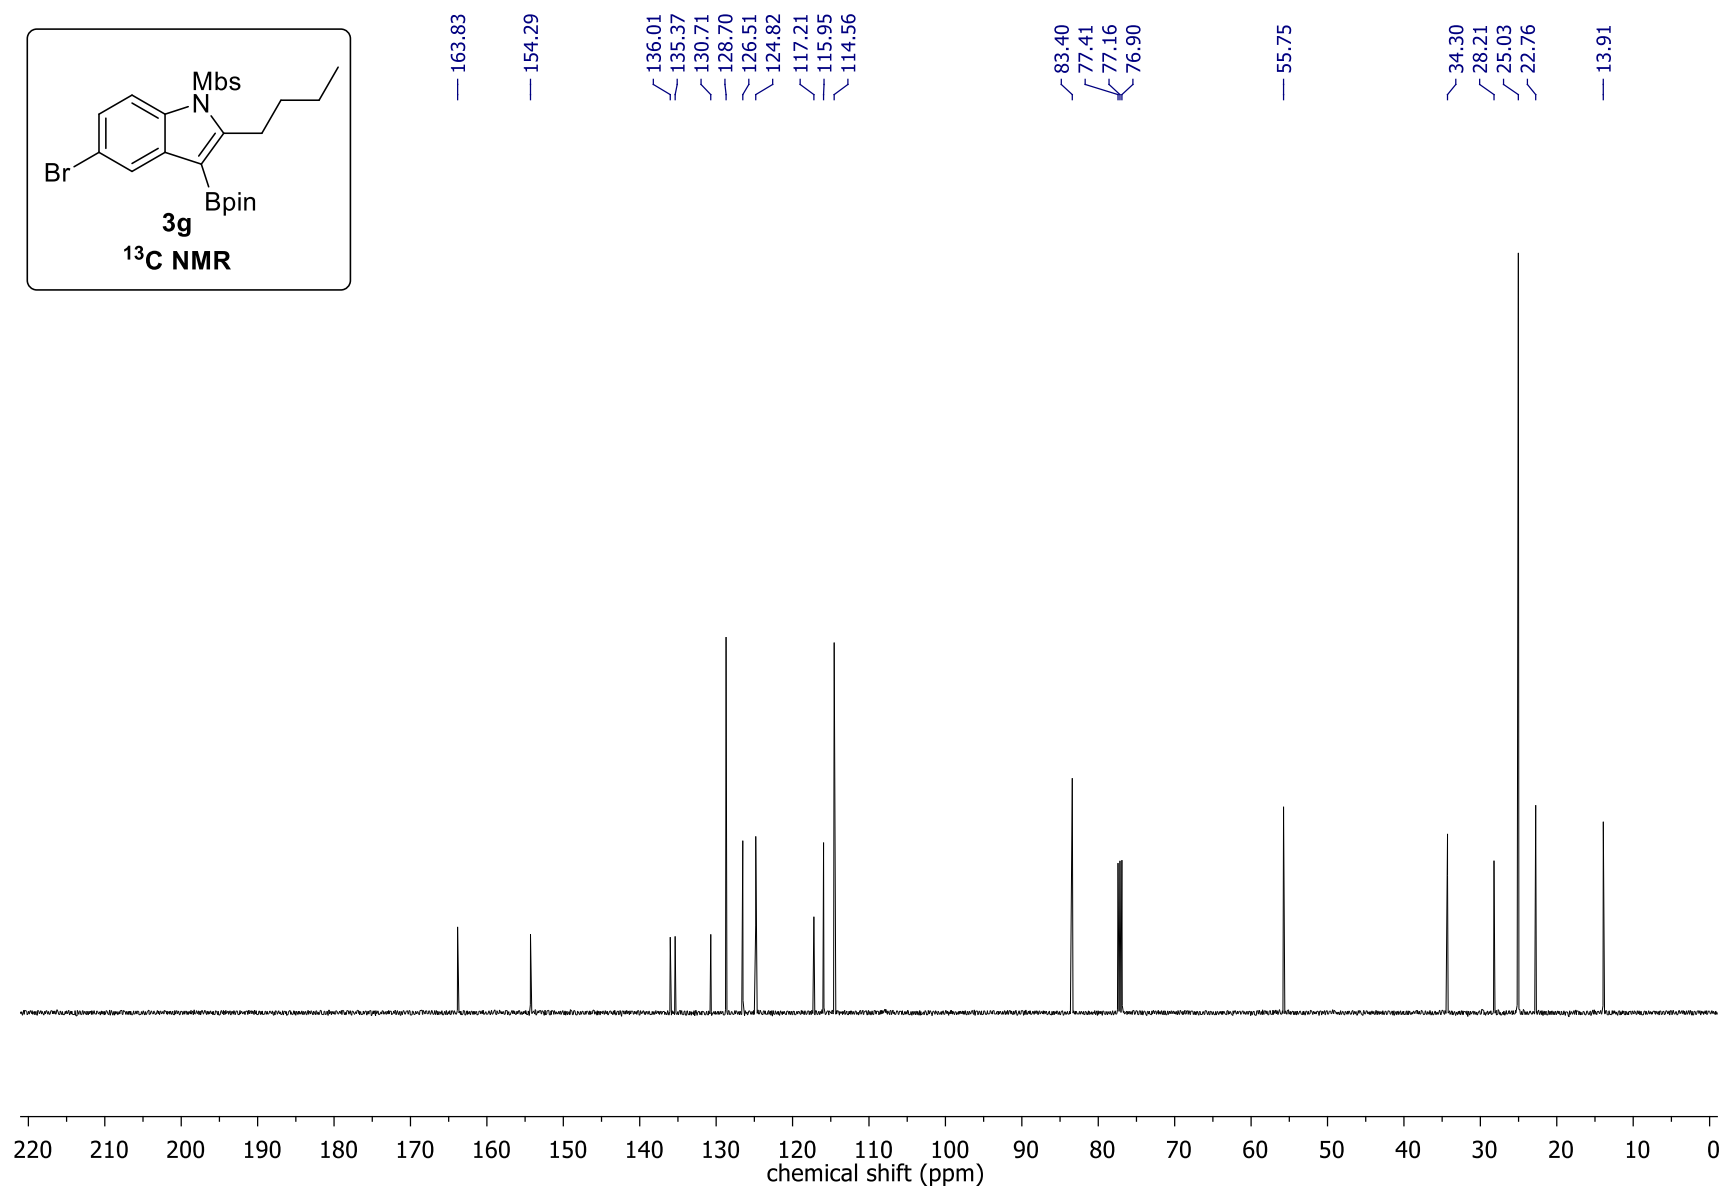

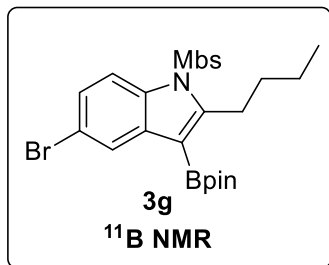

— 30.08

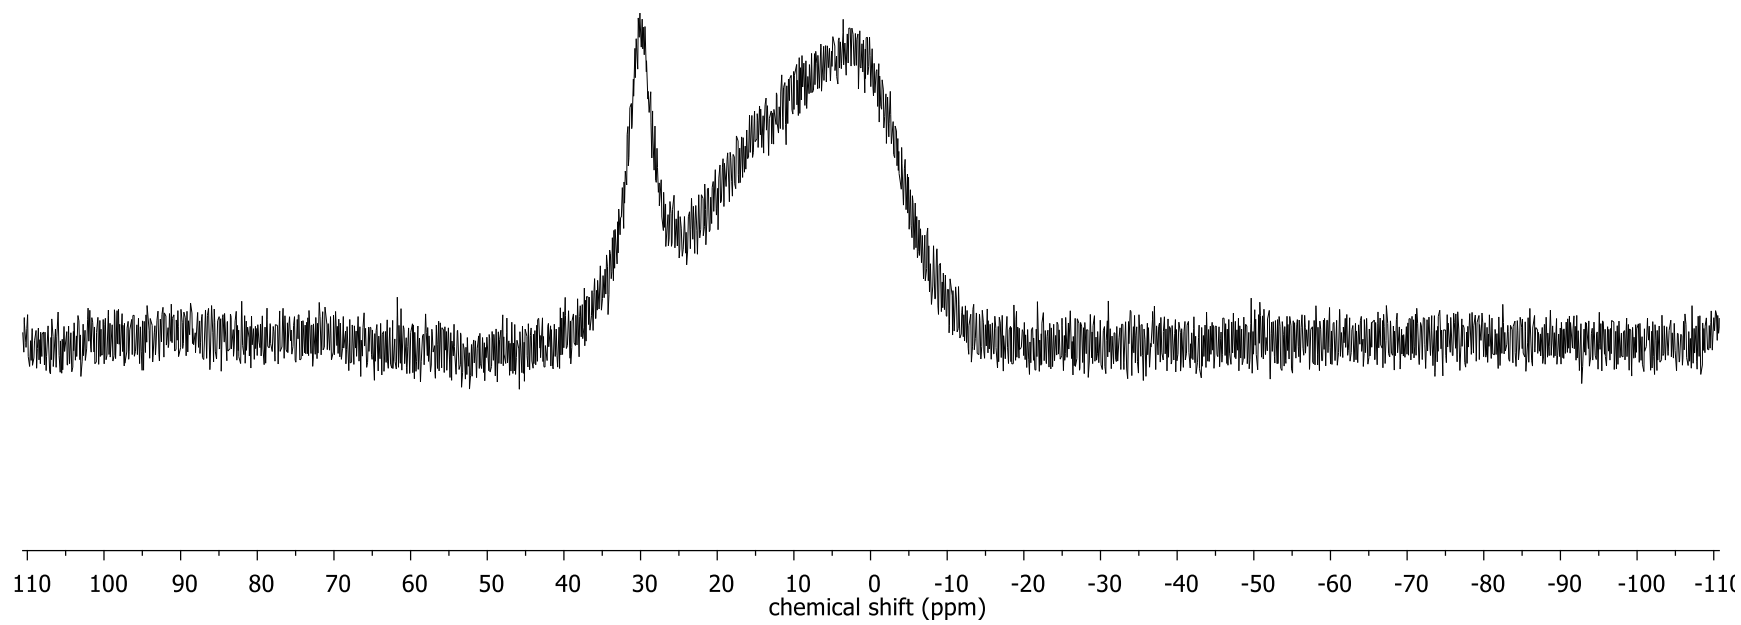

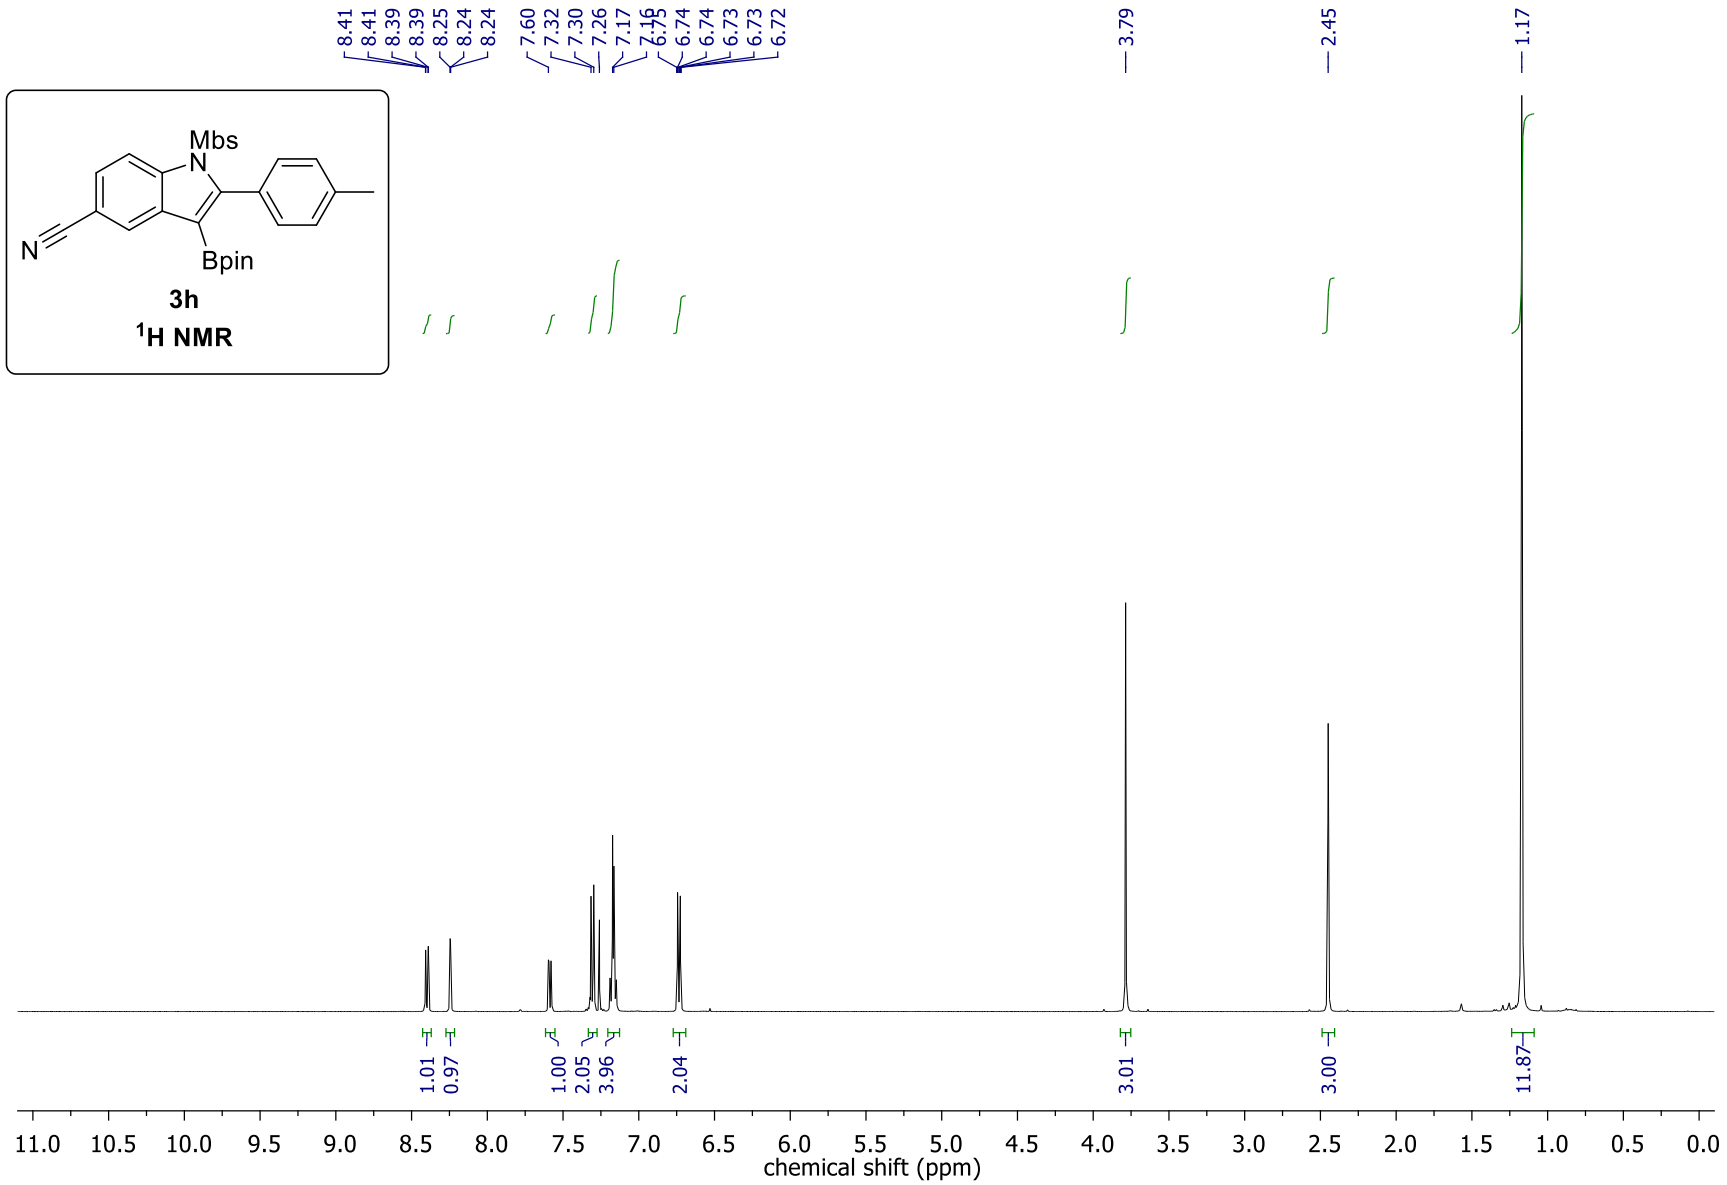

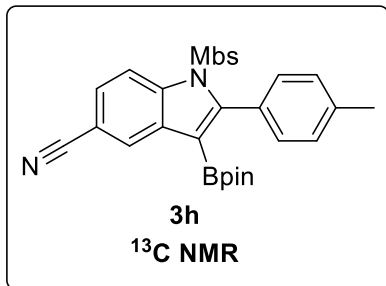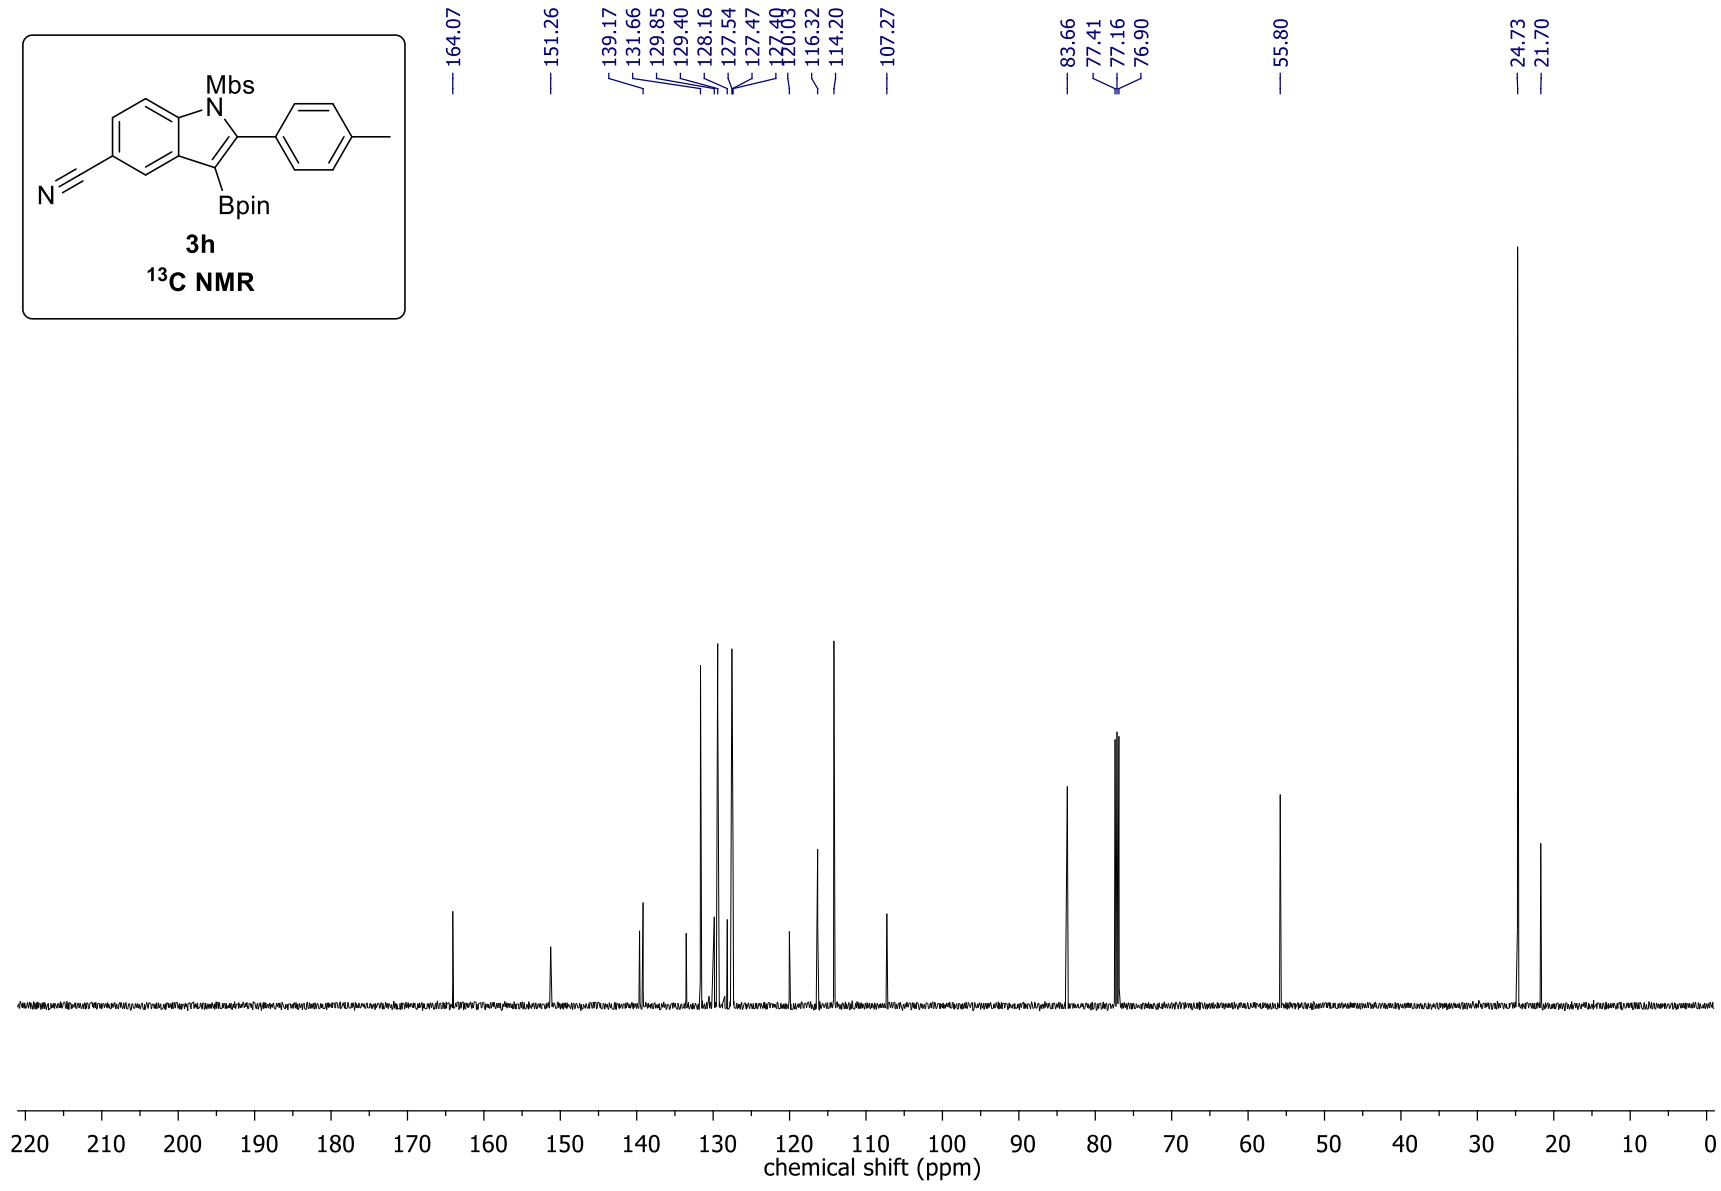

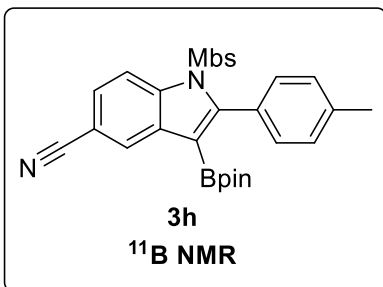

— 29.53

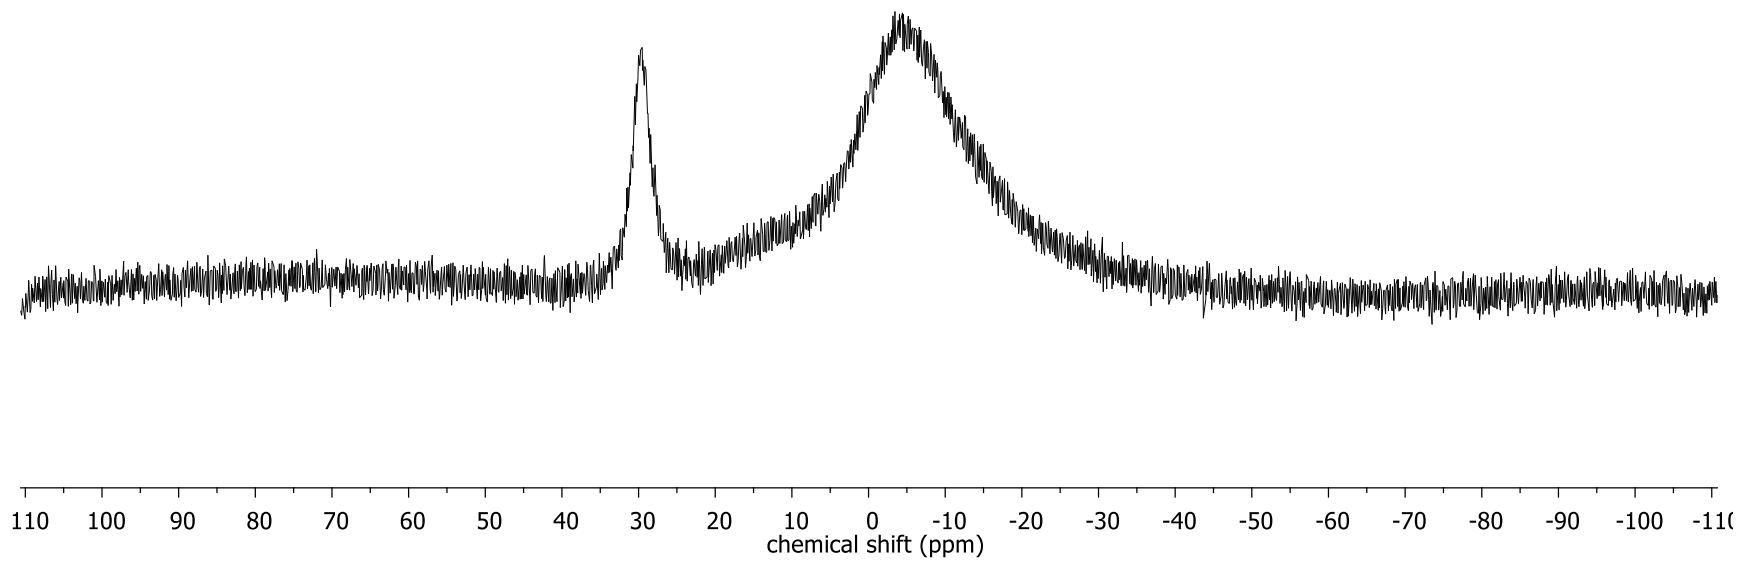

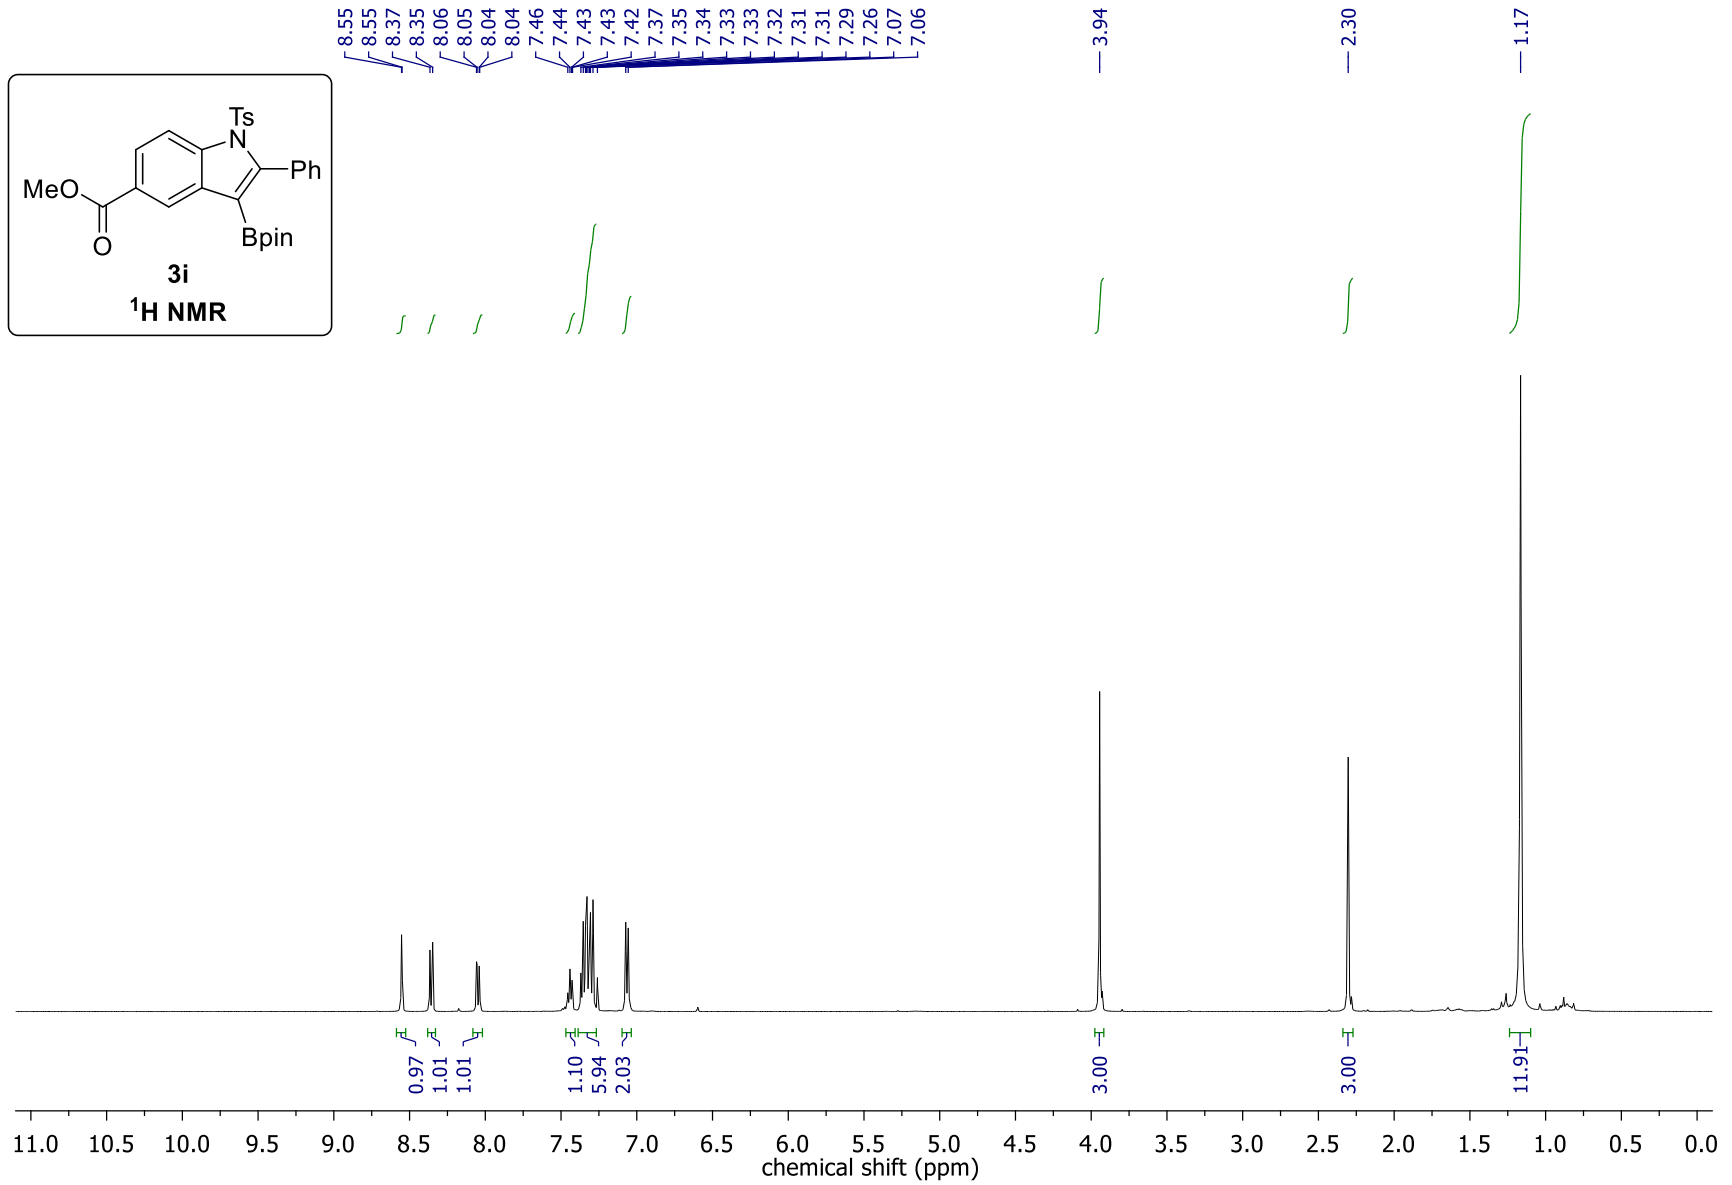

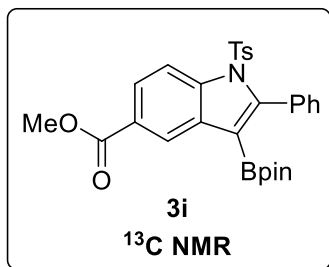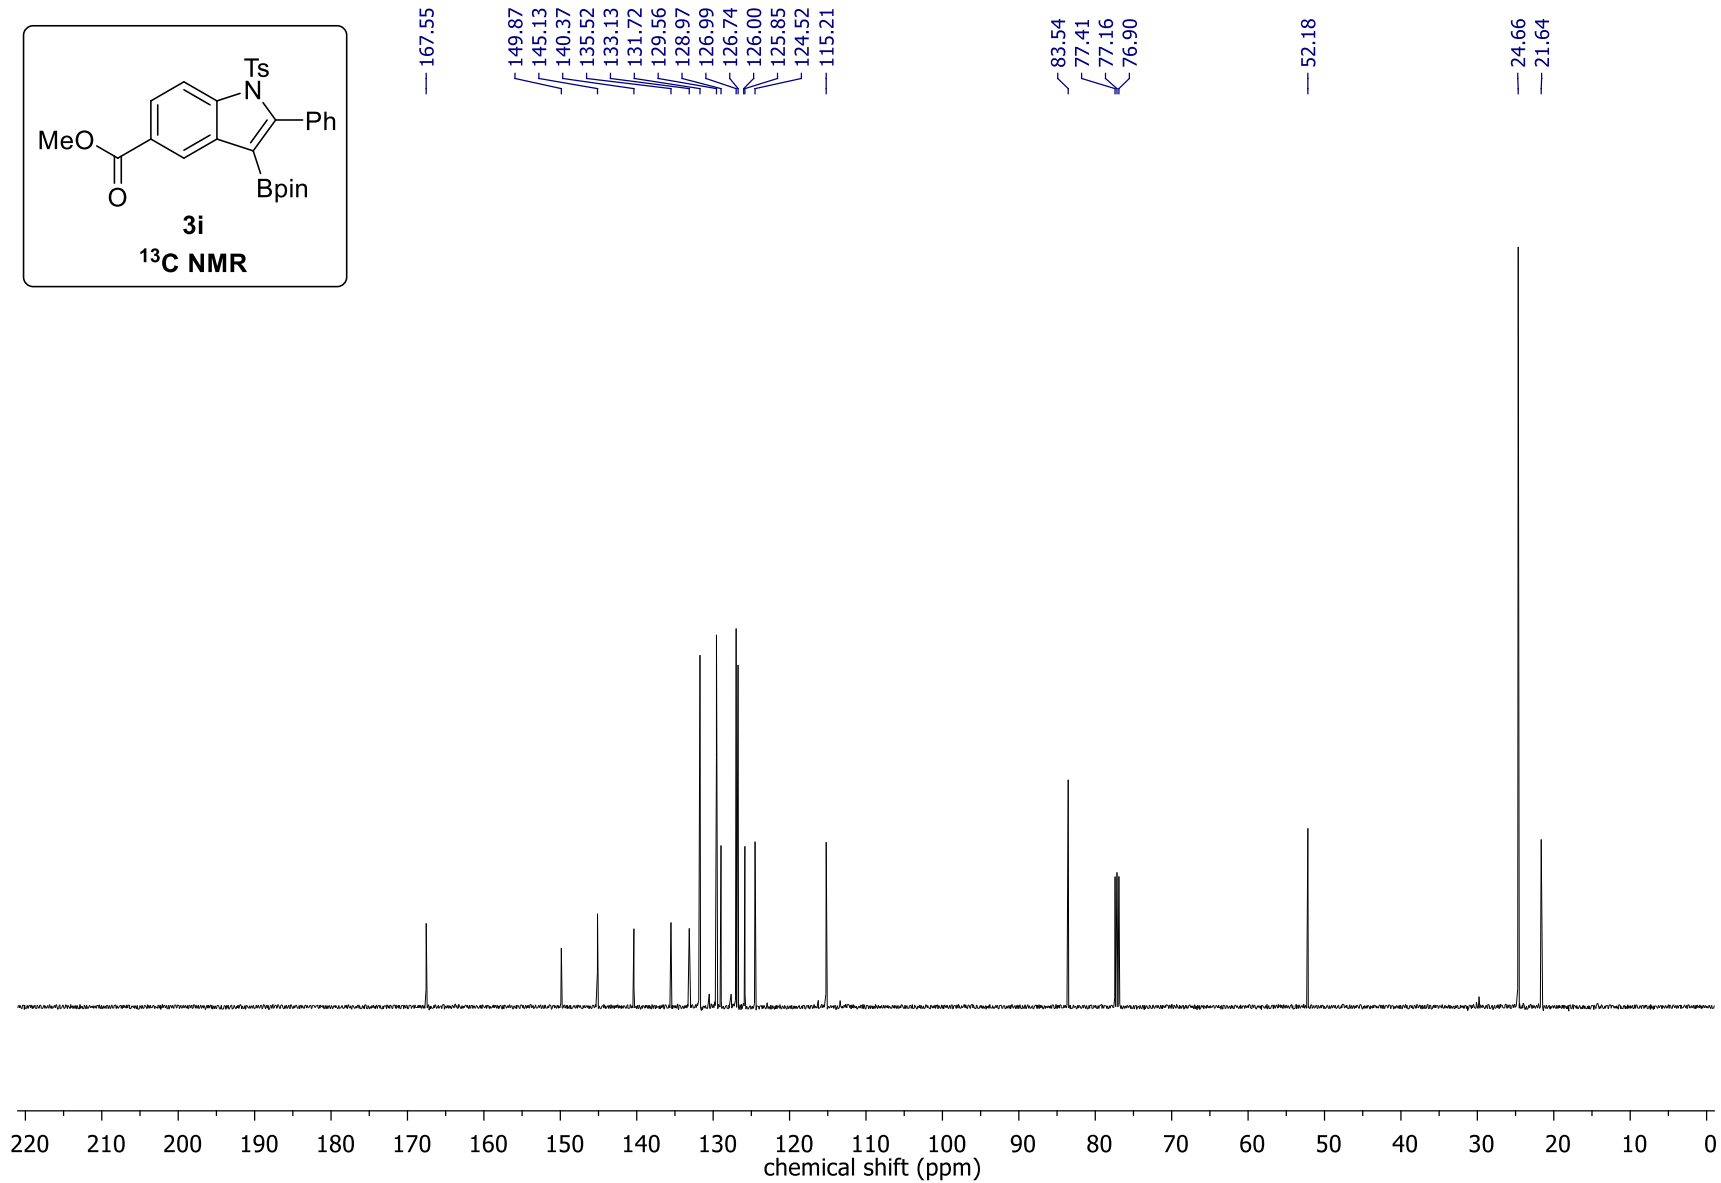

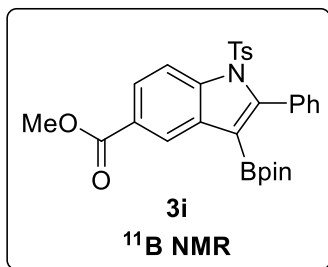

— 30.19

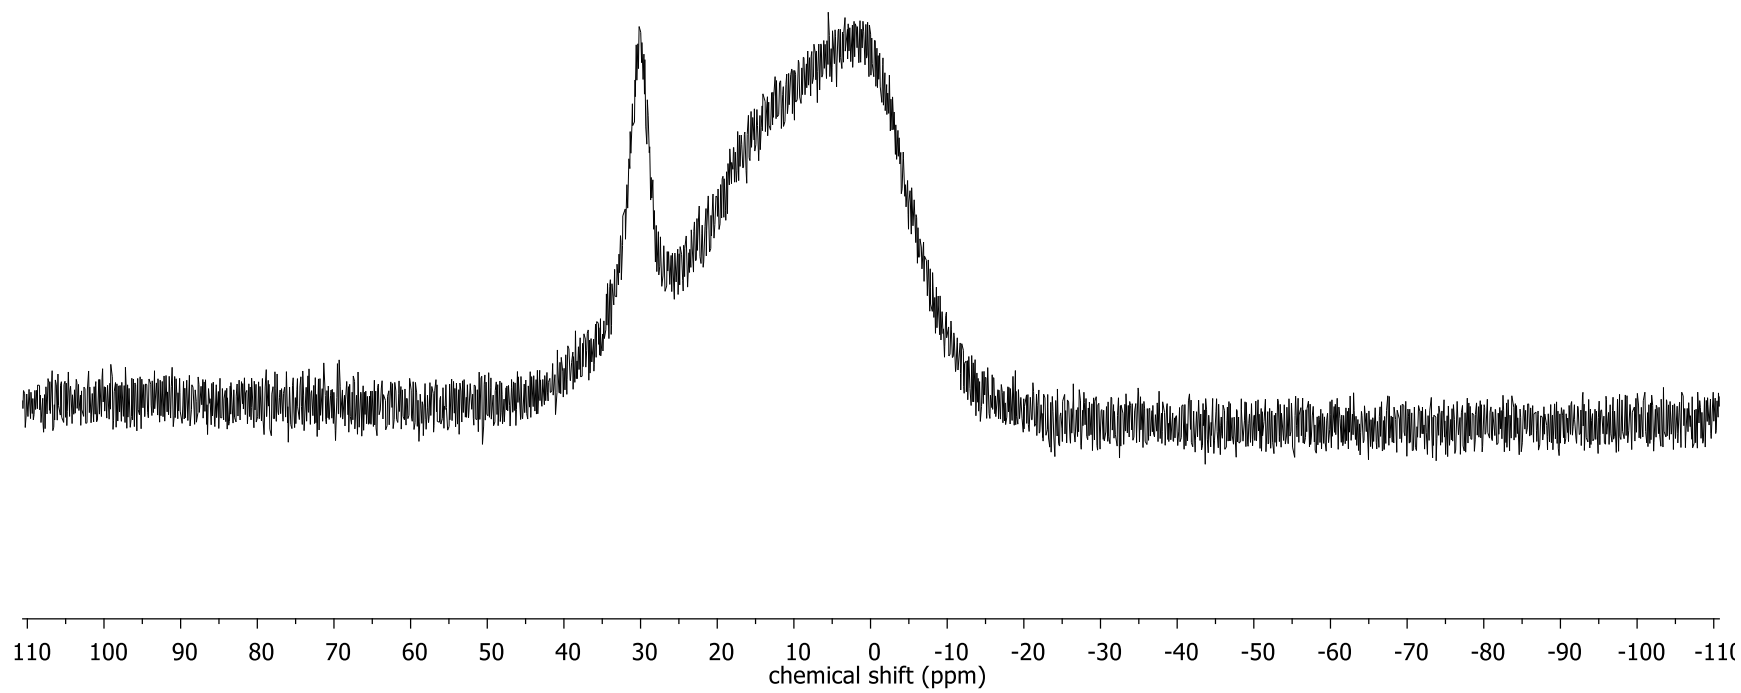



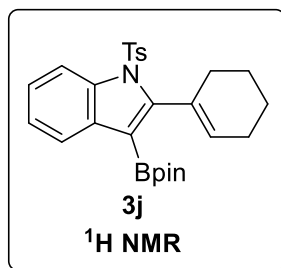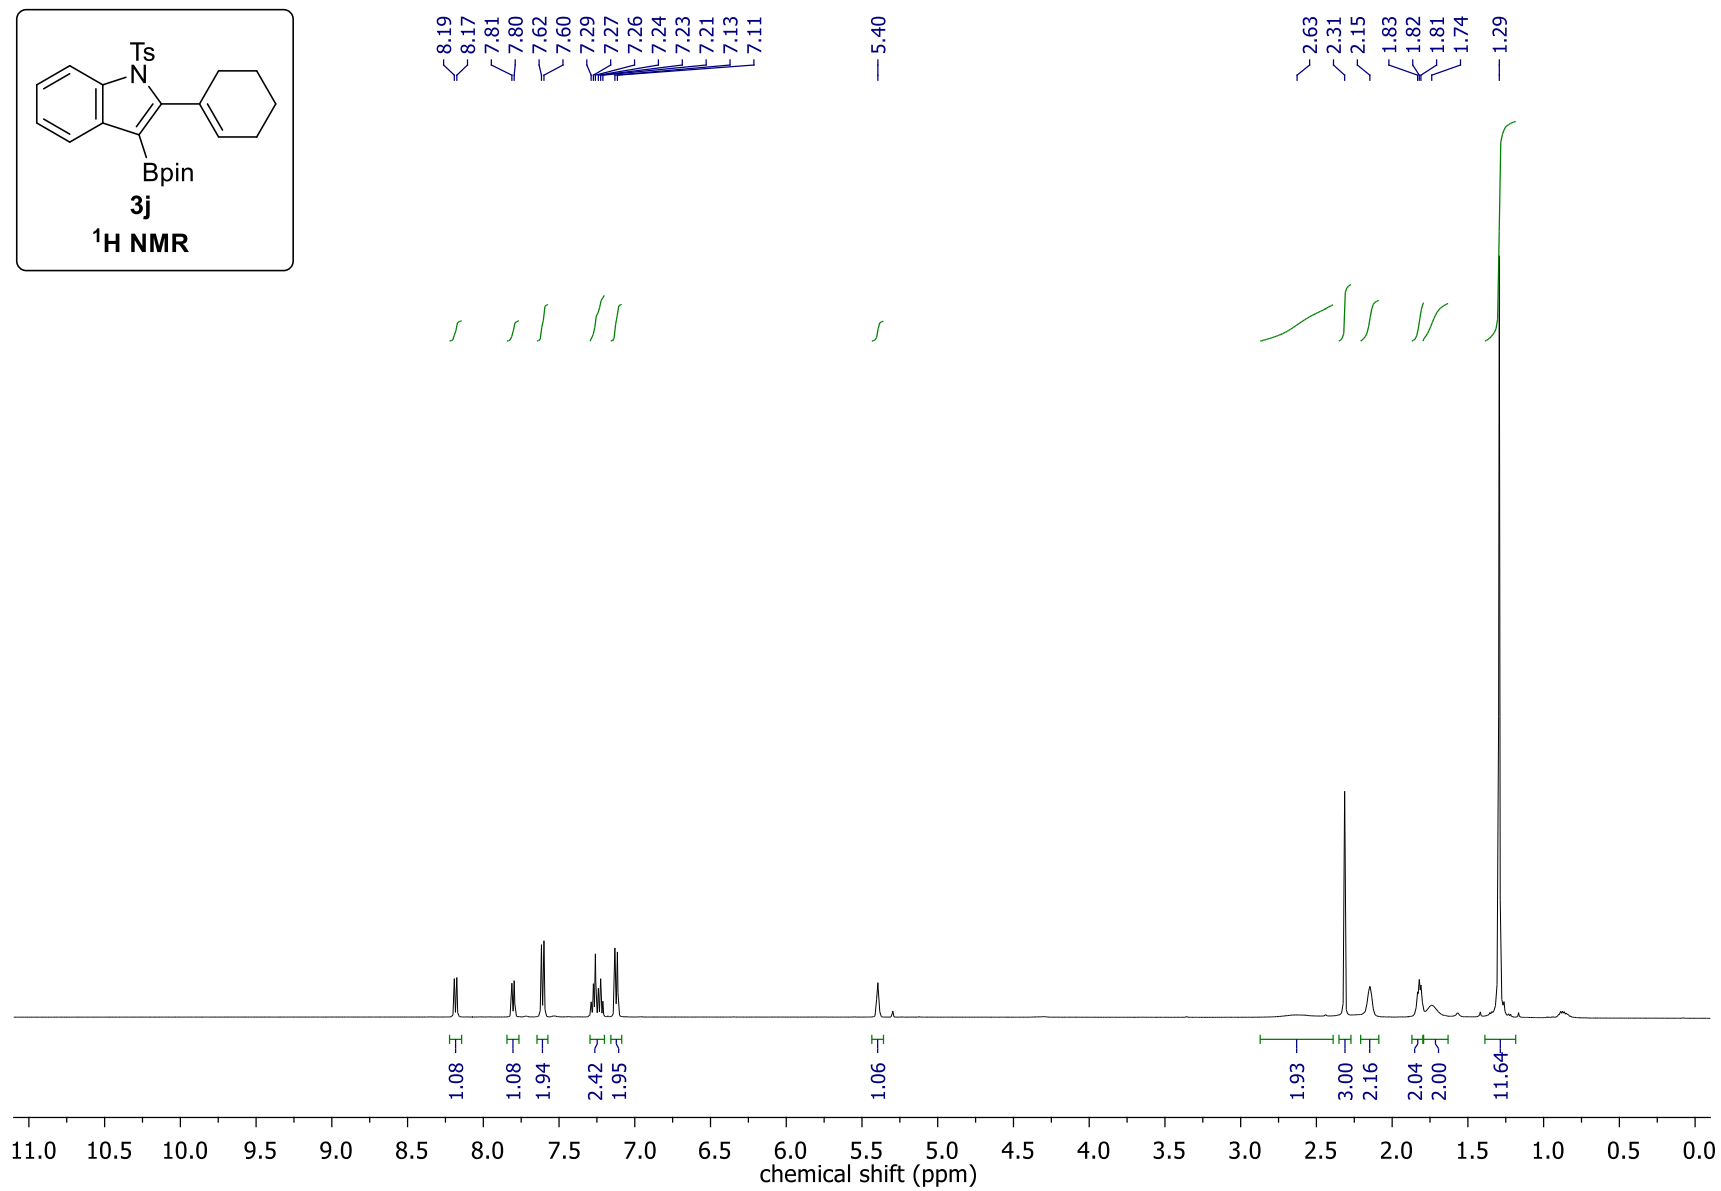

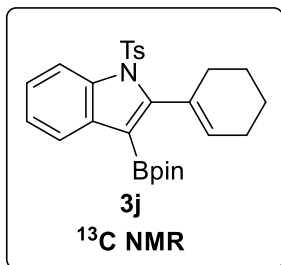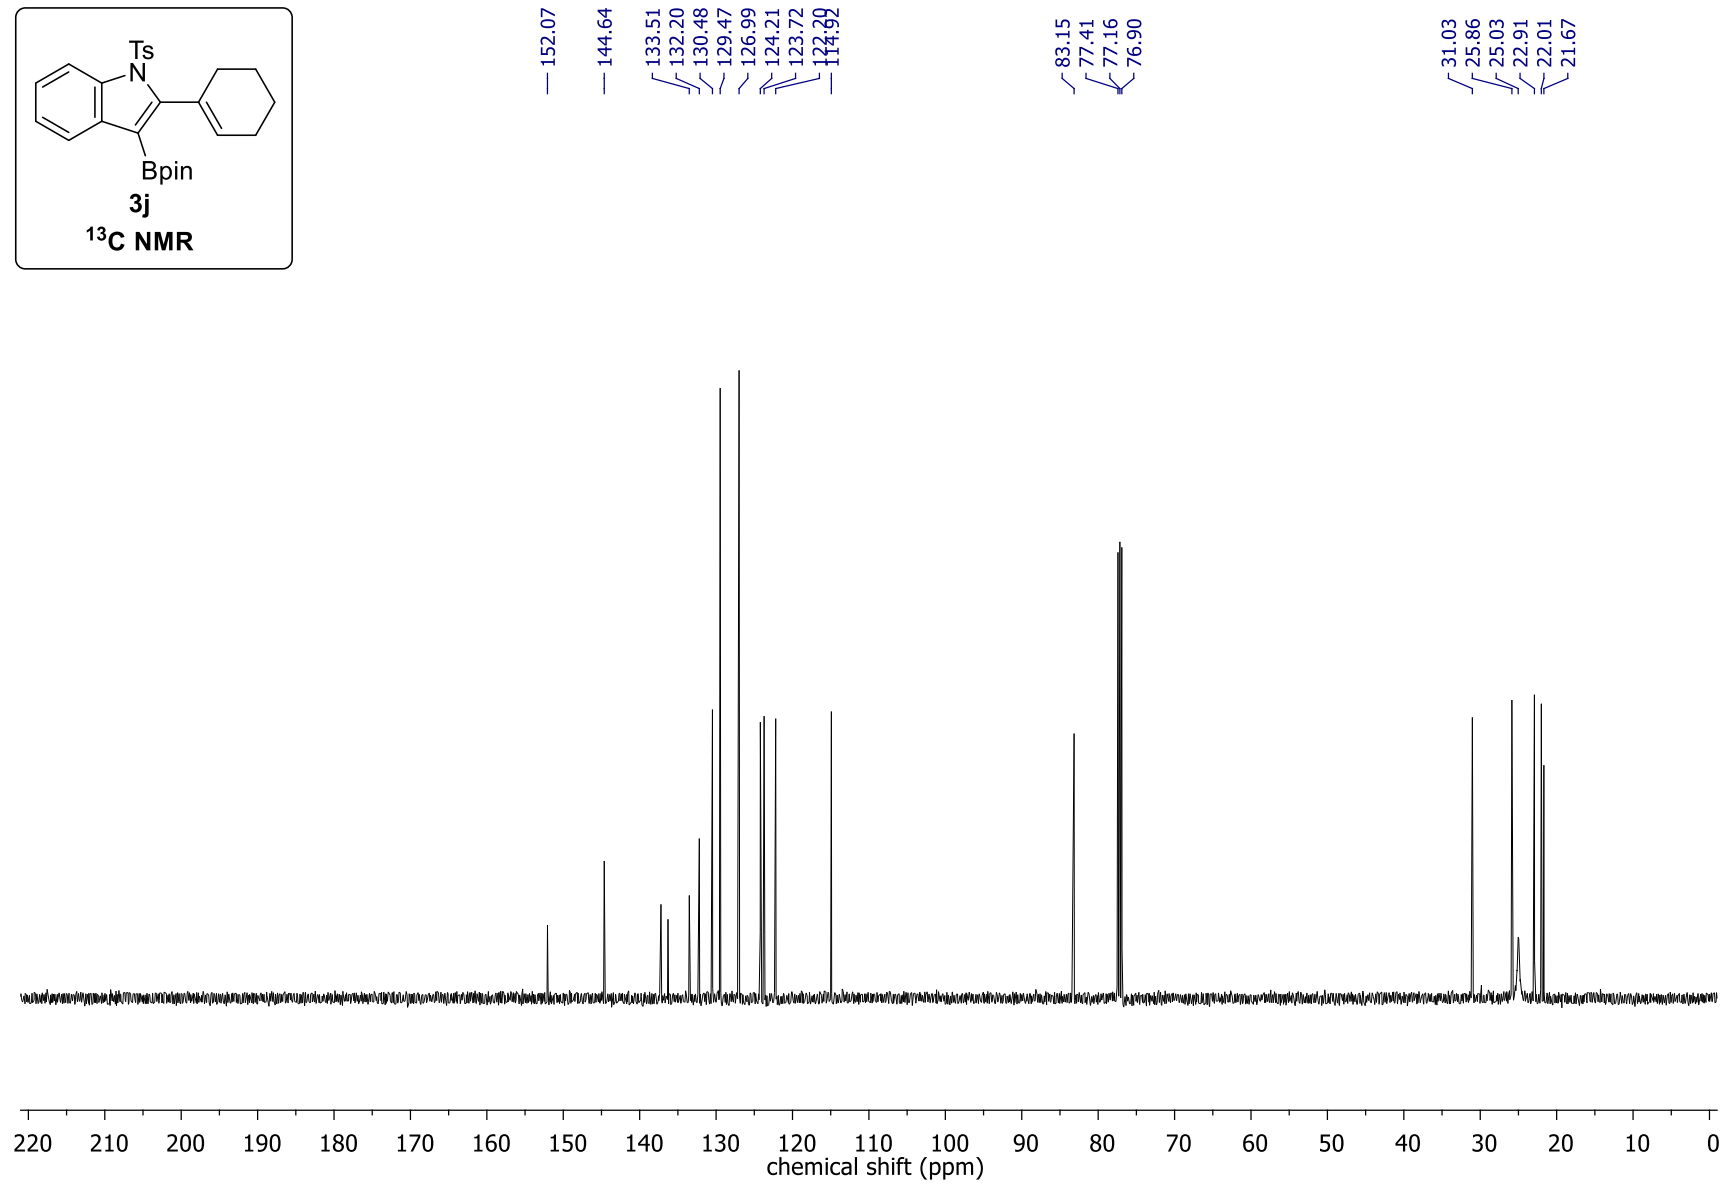

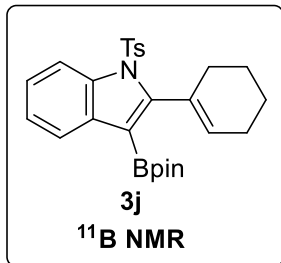

— 30.56

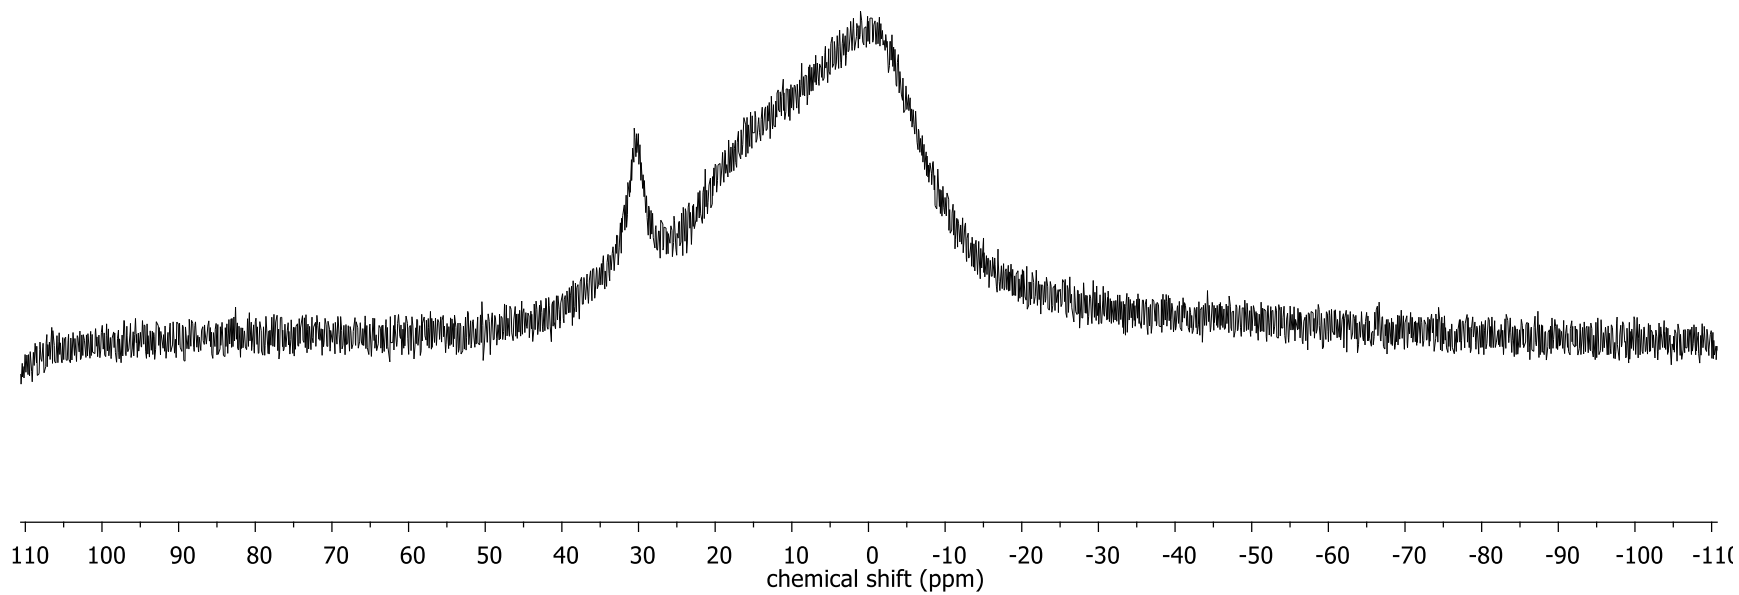

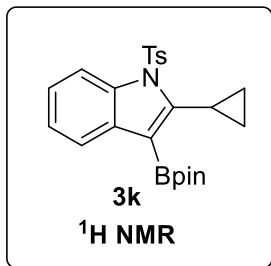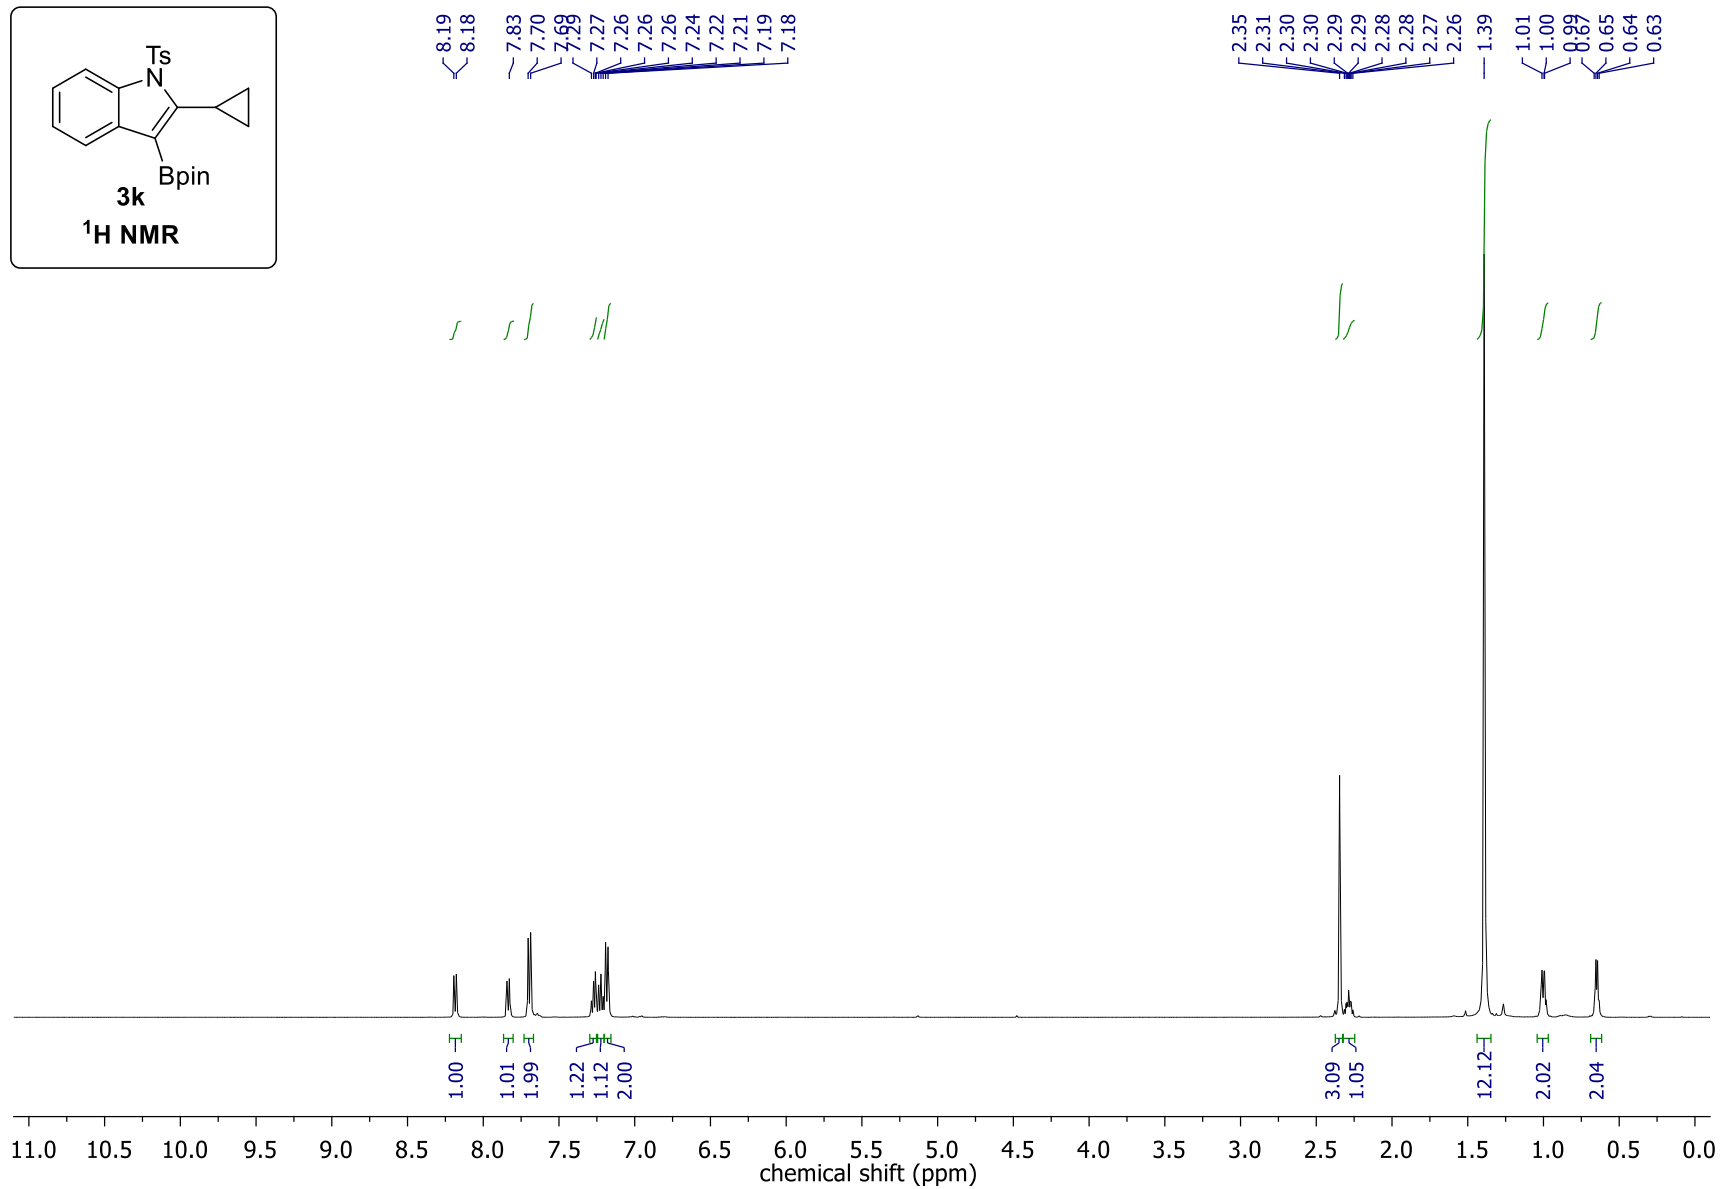

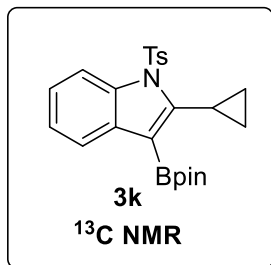

— 151.03  
— 144.65  
/ 137.63  
/ 137.11  
/ 132.89  
/ 129.76  
/ 126.68  
/ 124.25  
/ 123.42  
/ 121.98  
— 114.28

— 83.75  
/ 77.41  
/ 77.16  
/ 76.90

— 25.08  
— 21.67

— 10.59  
— 9.41

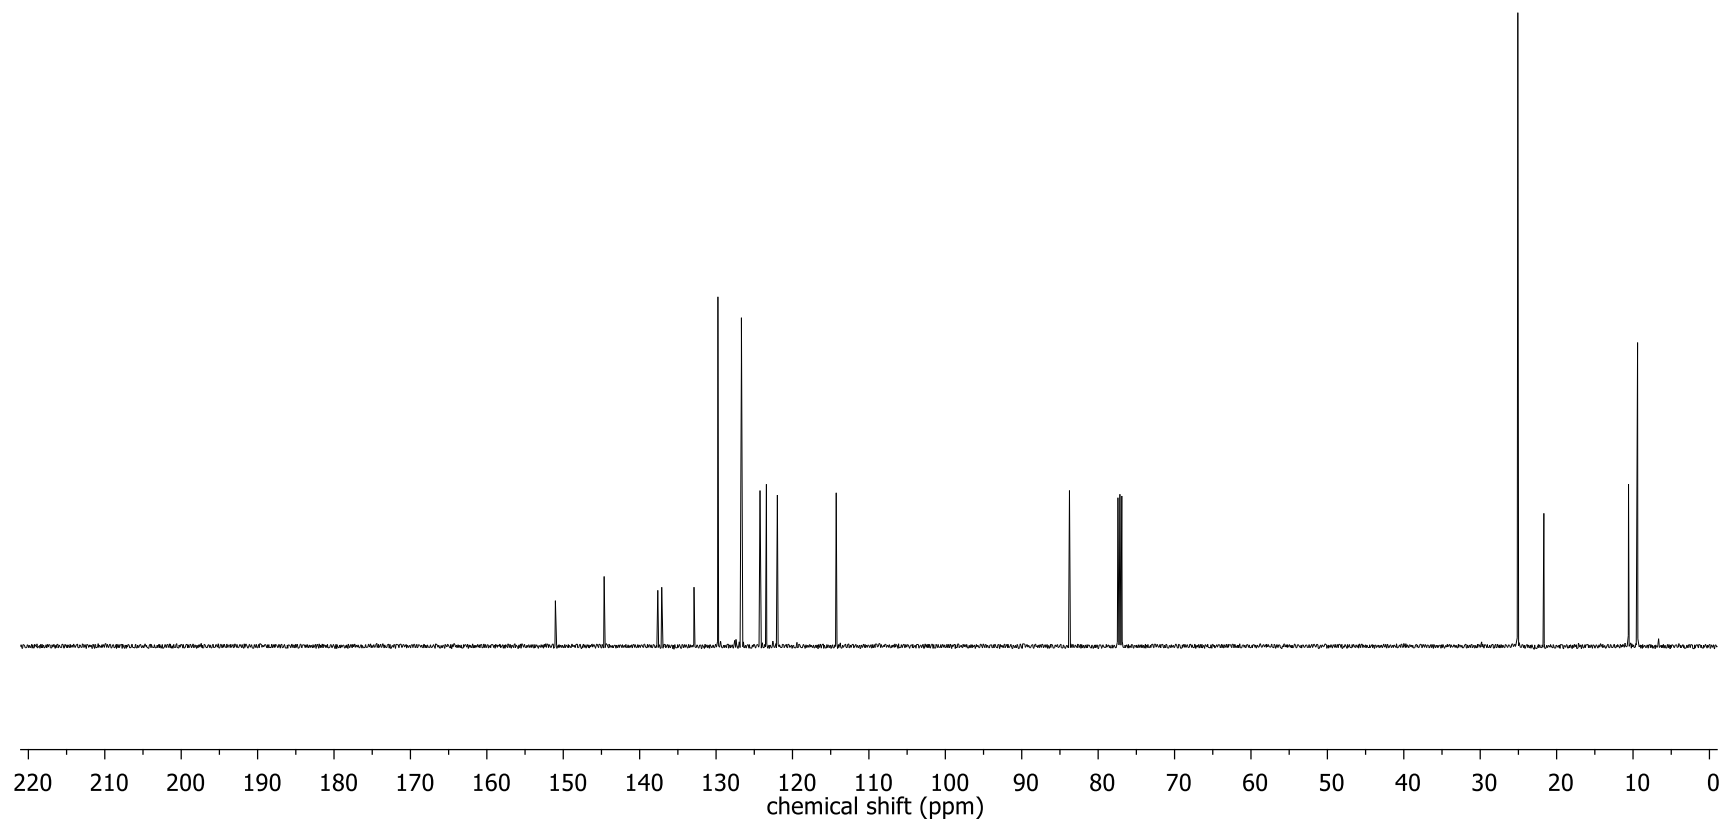

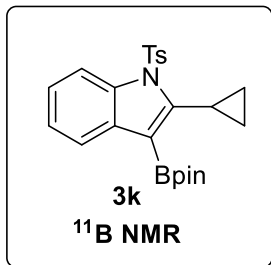

— 30.83

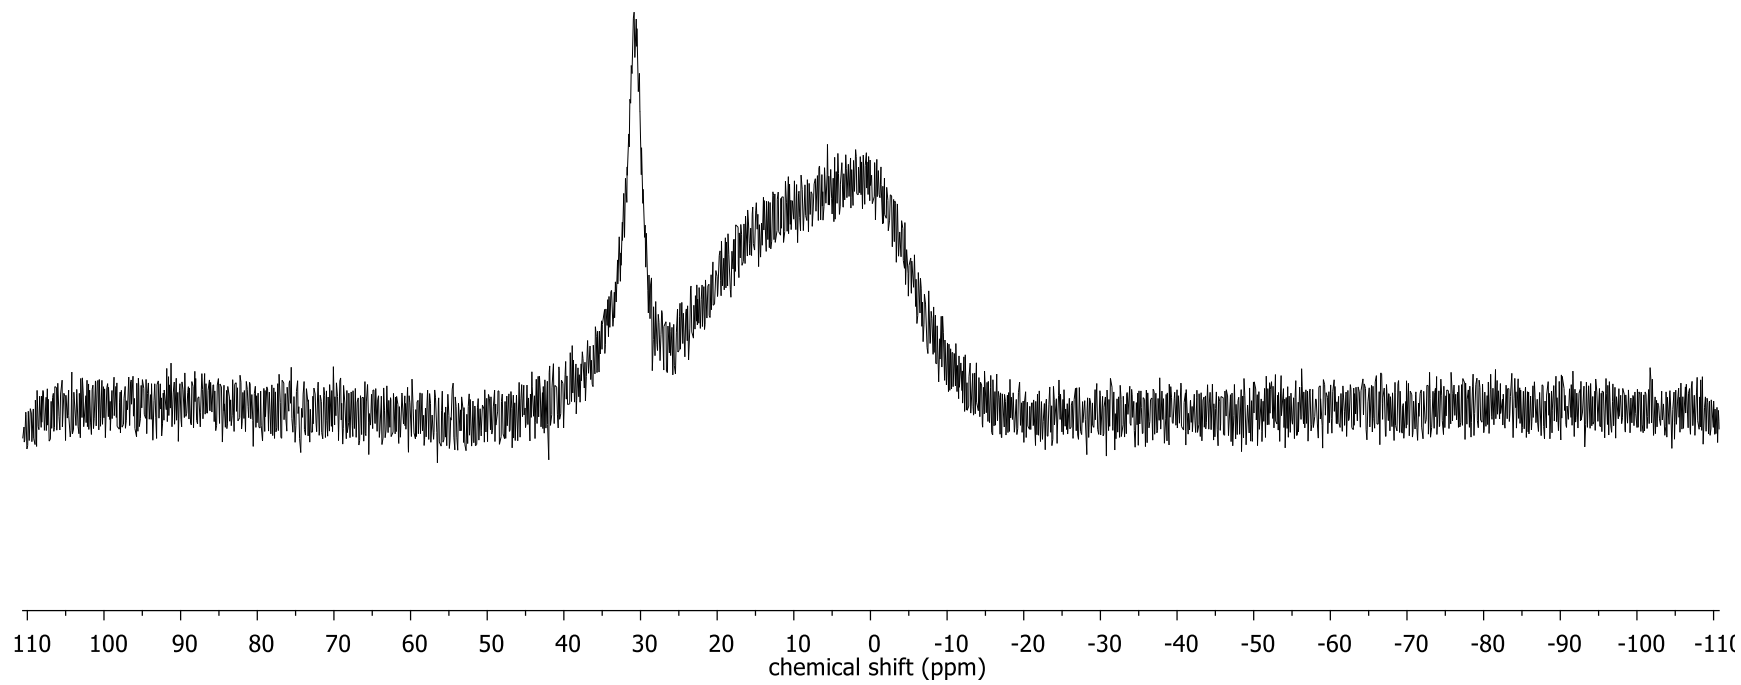

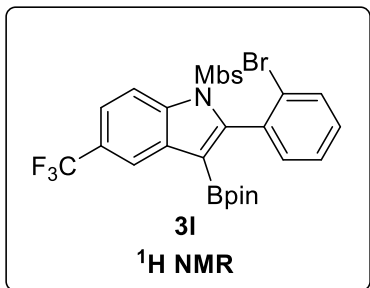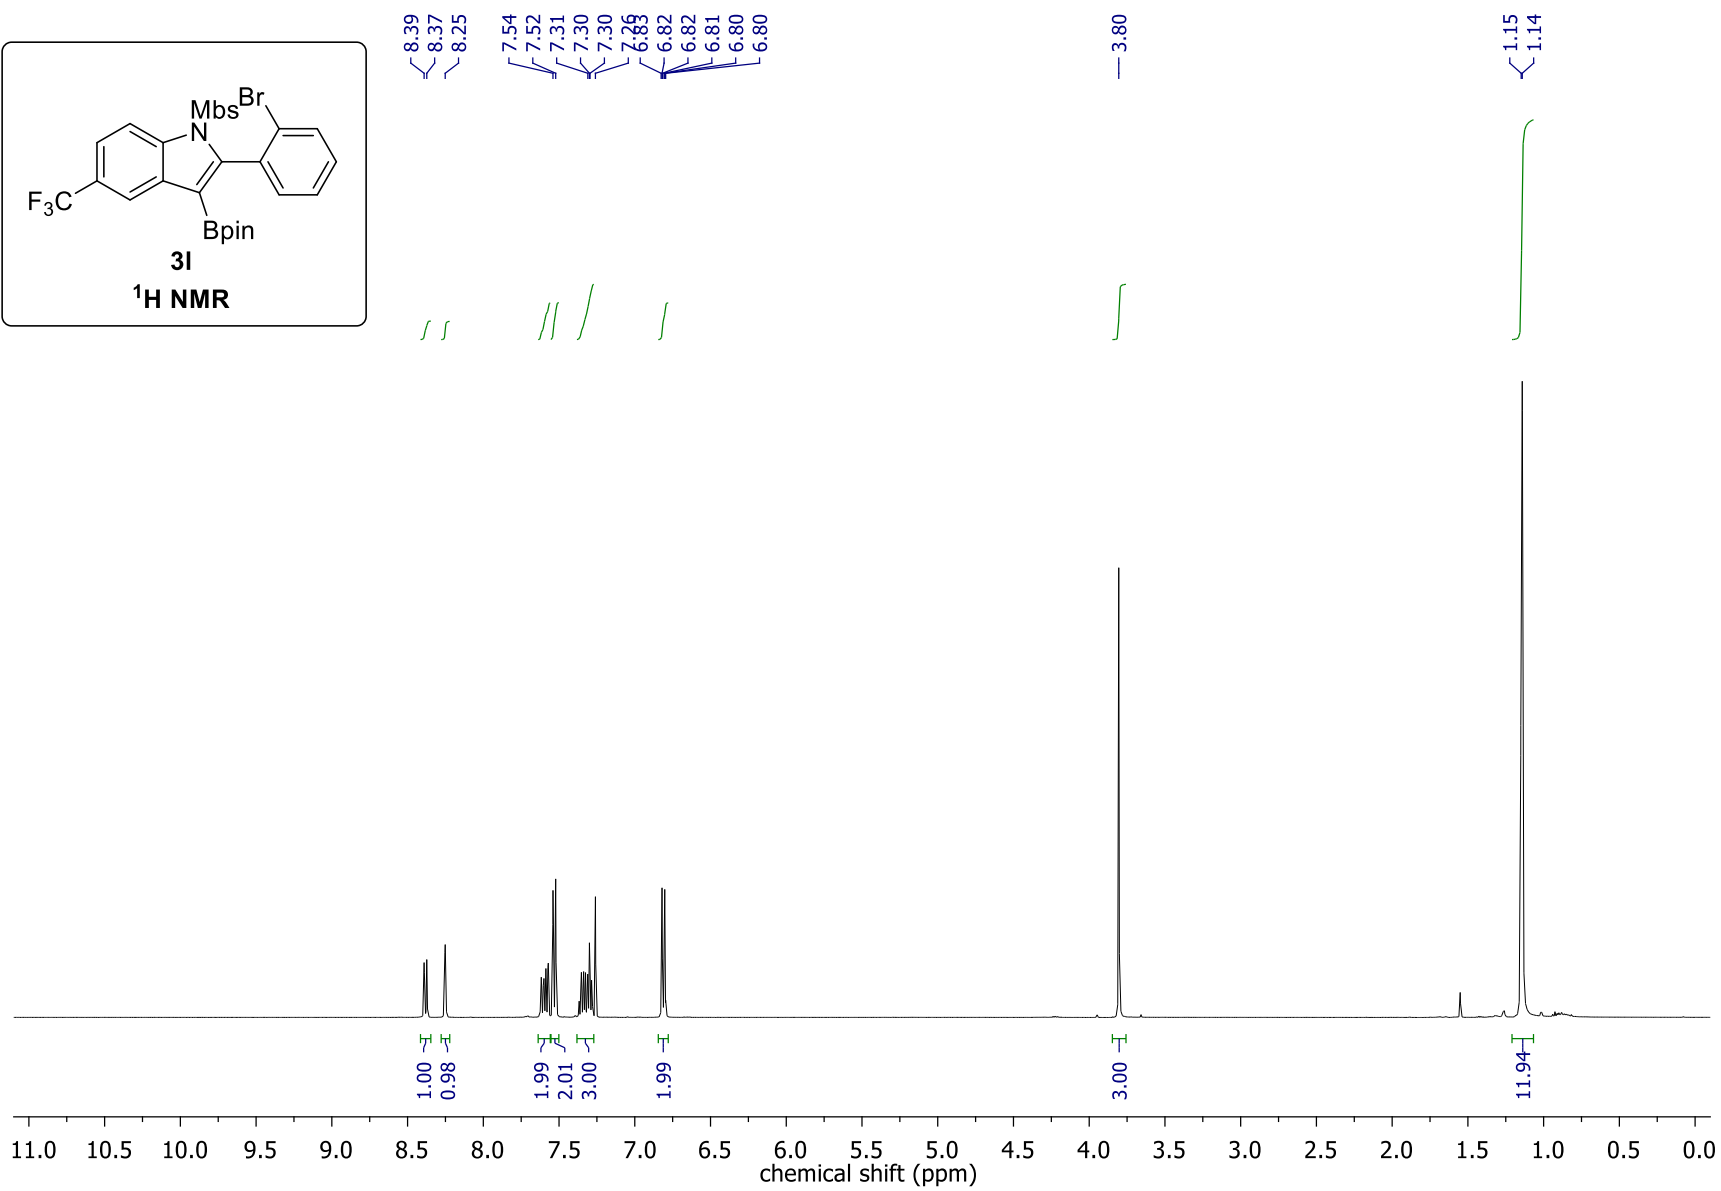

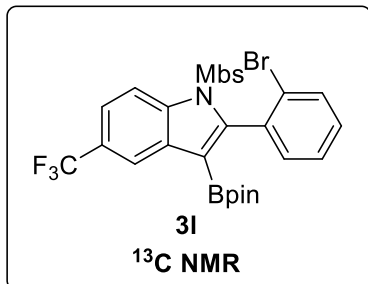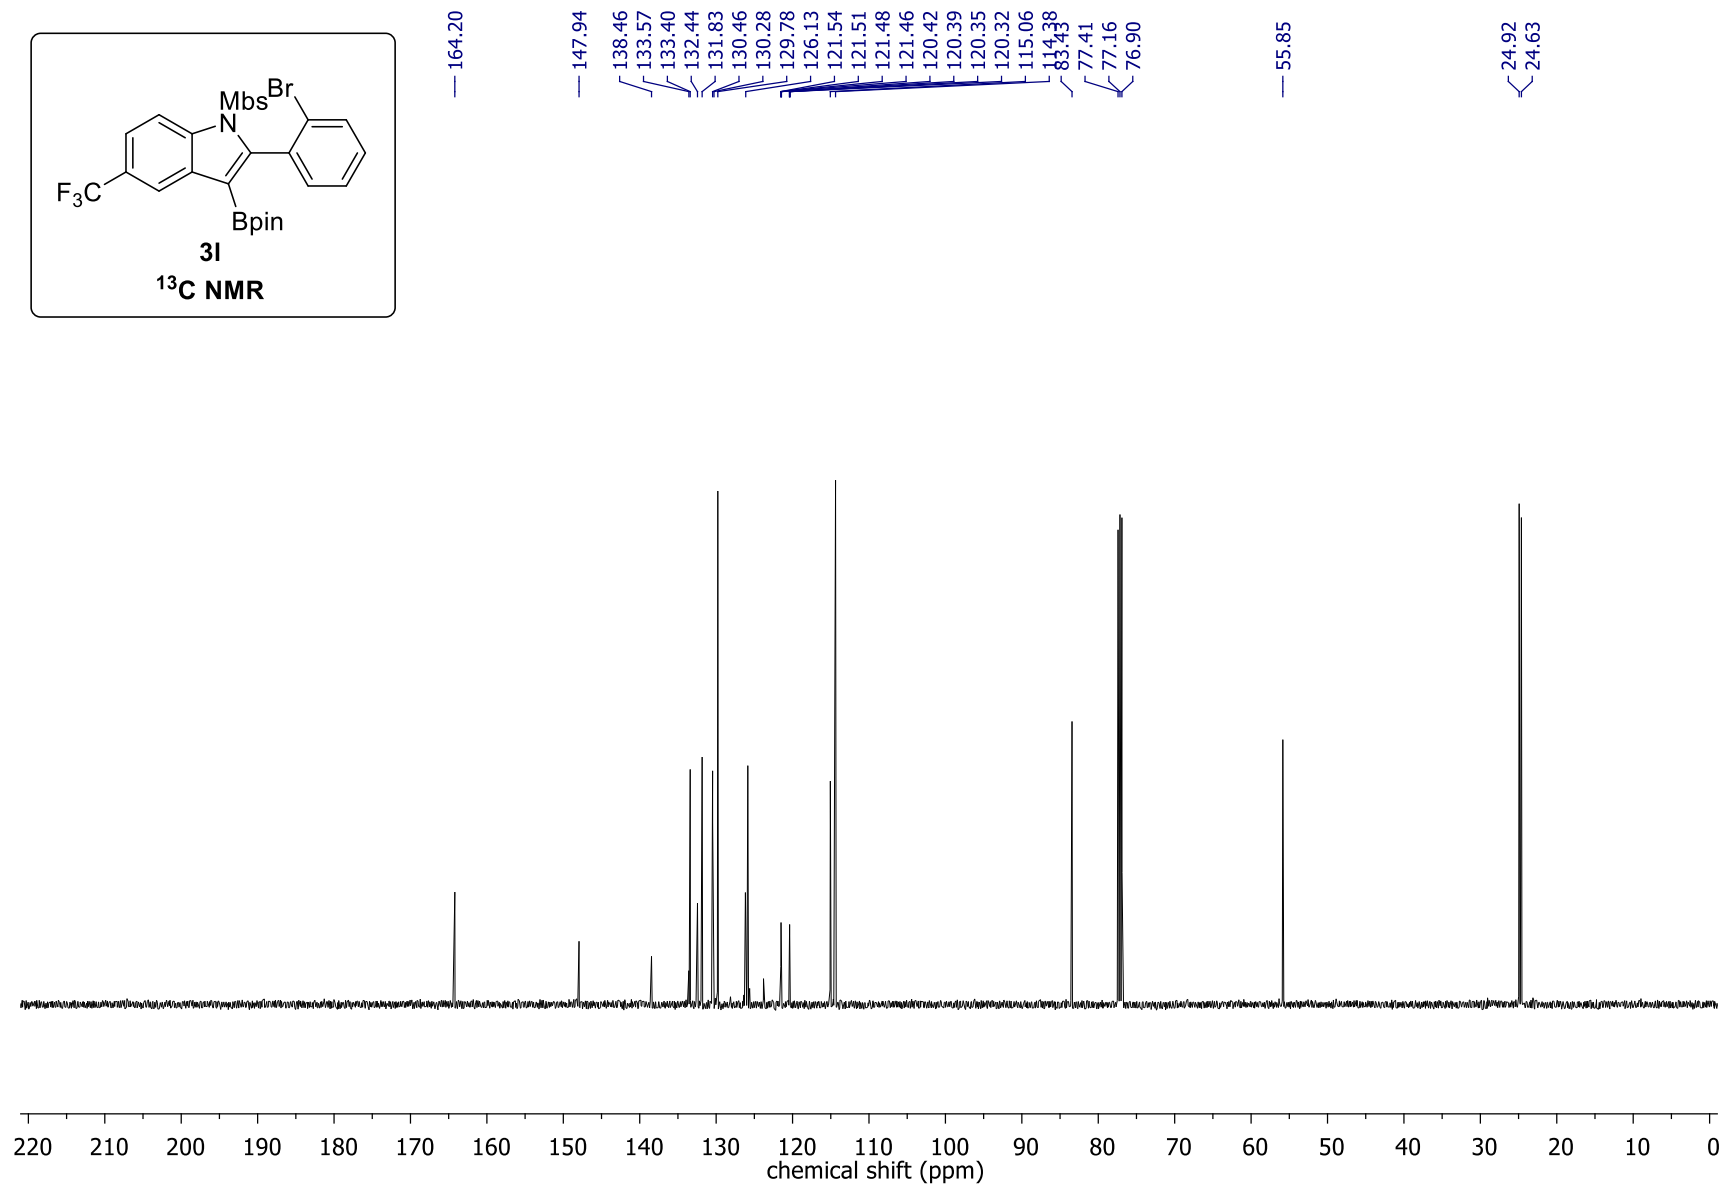



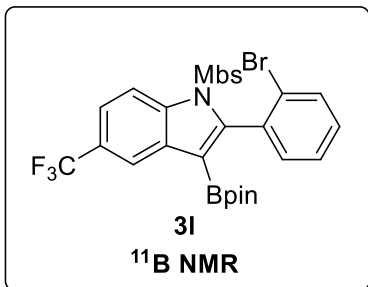

— 29.60

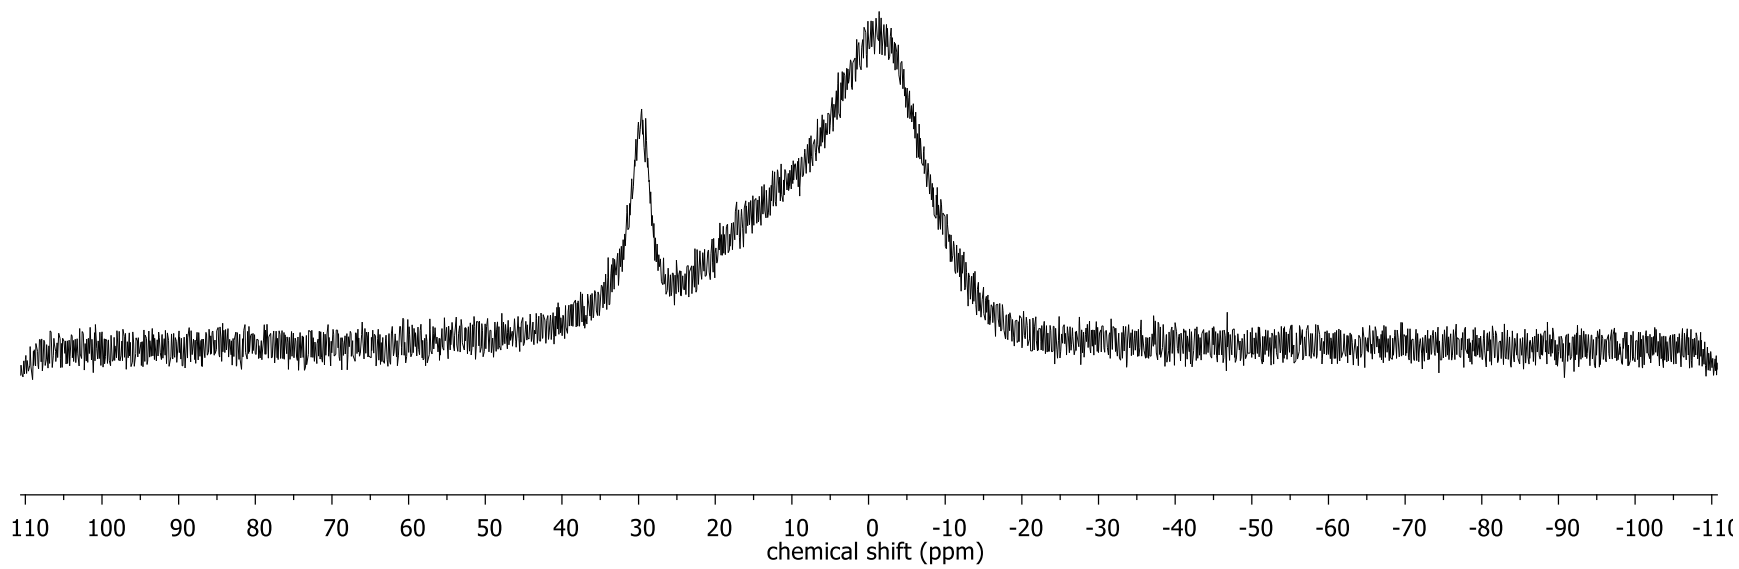

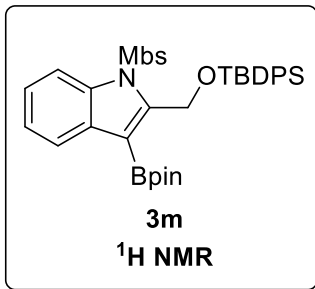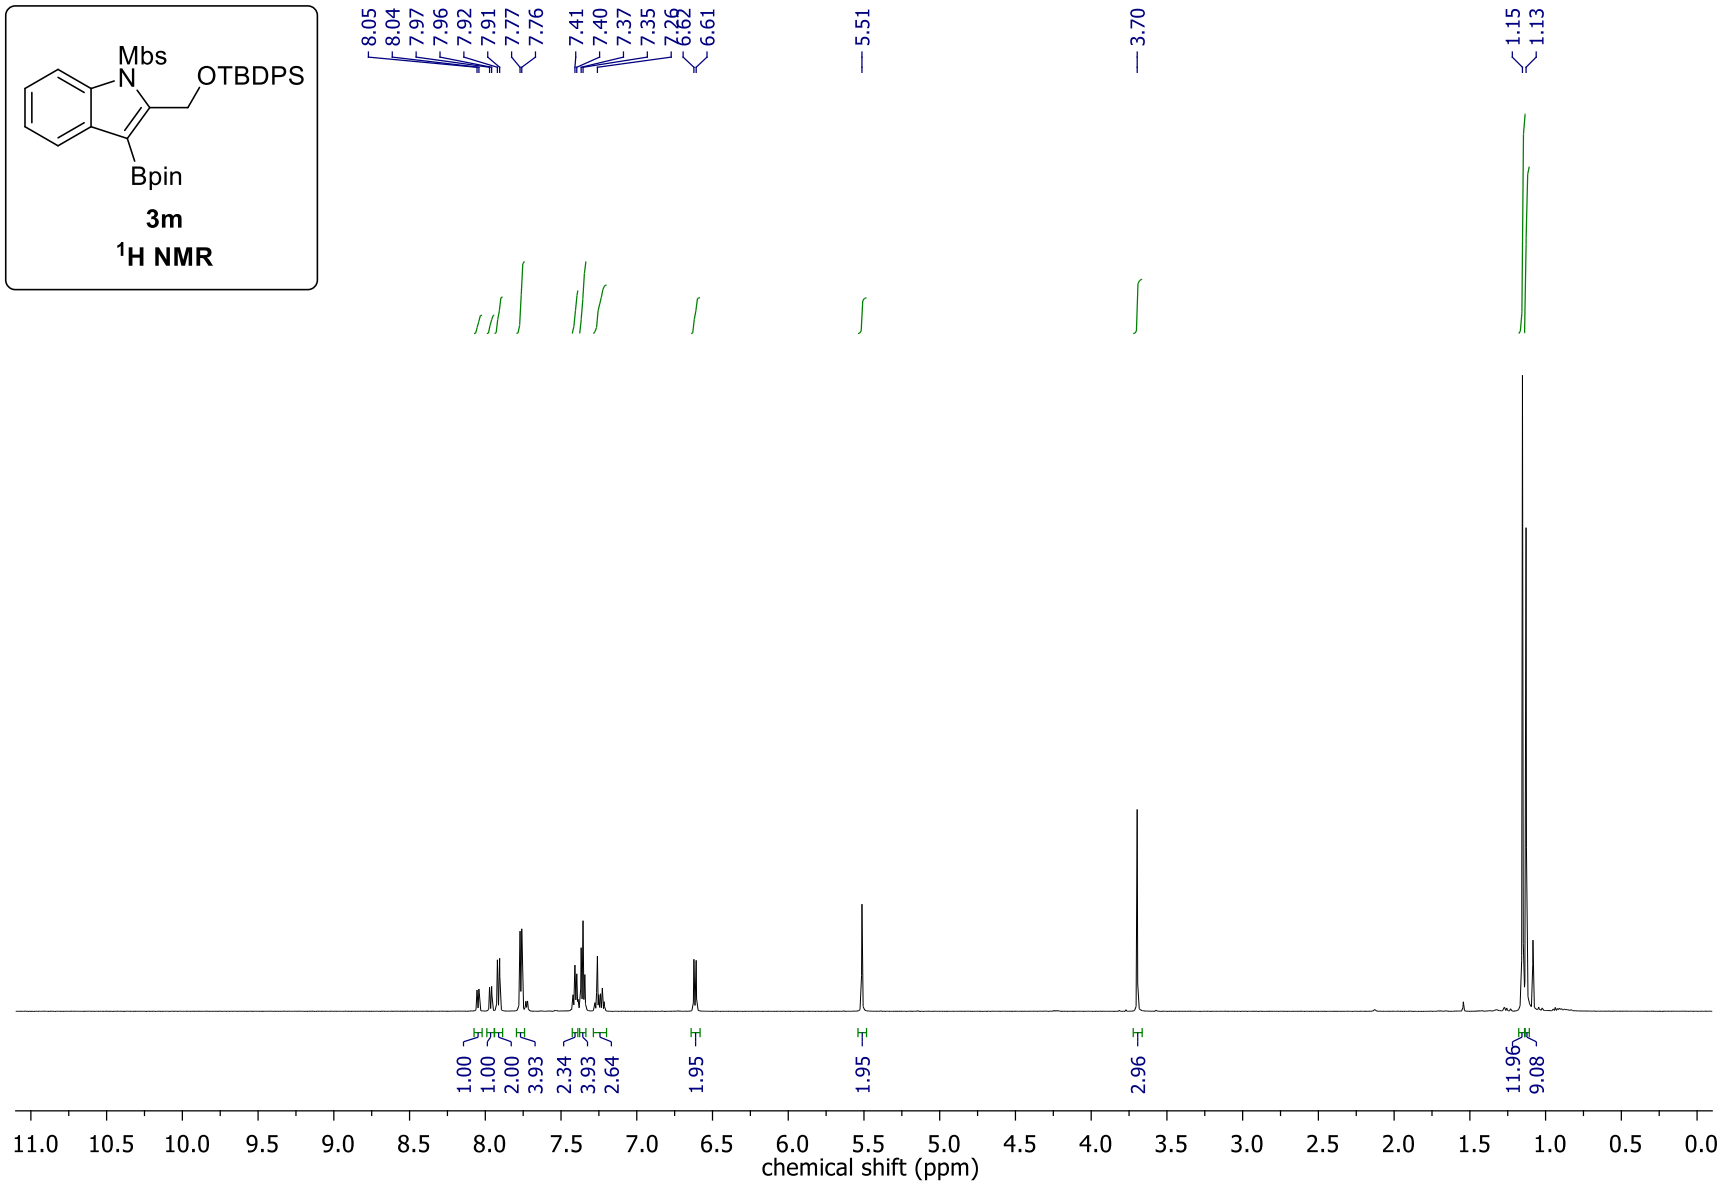

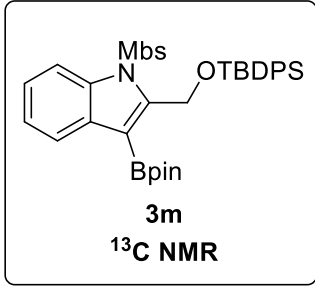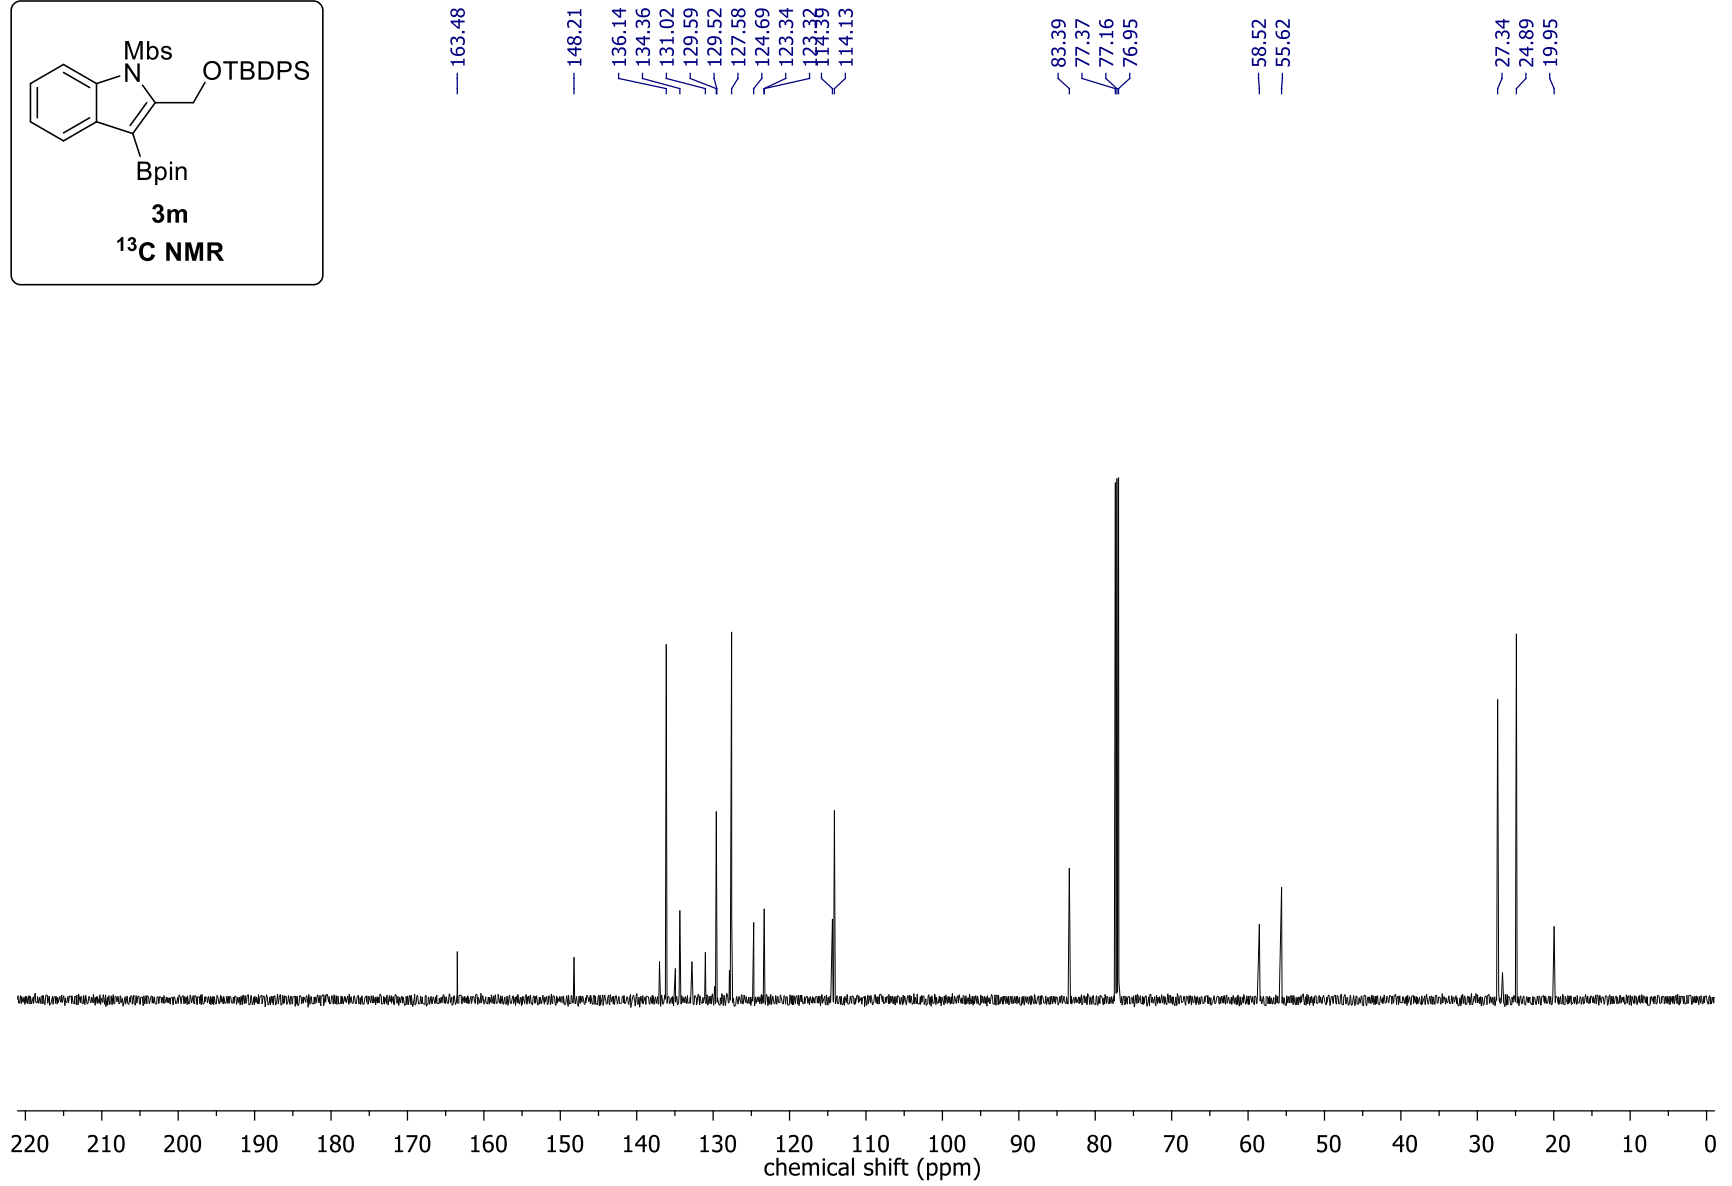

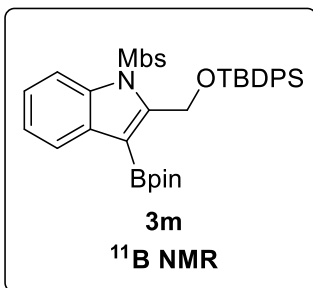

— 30.09

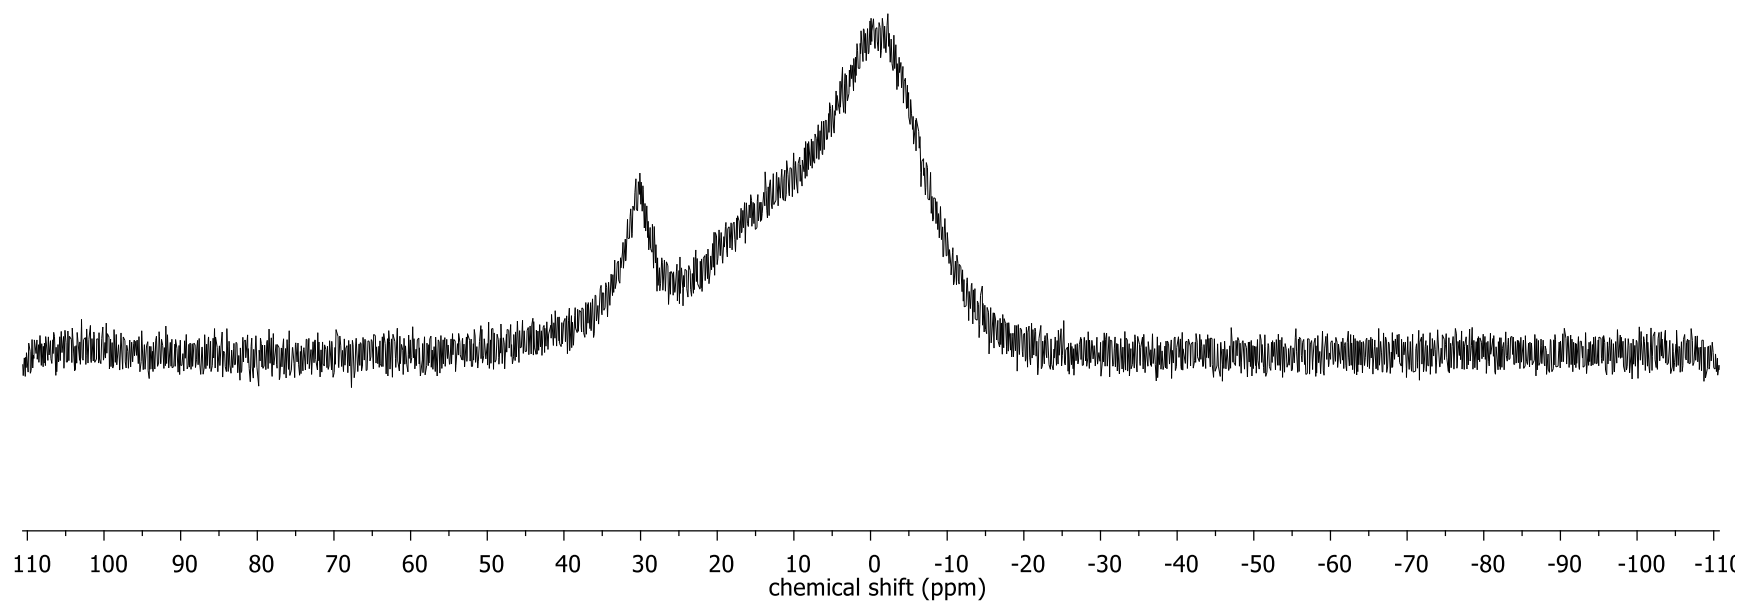

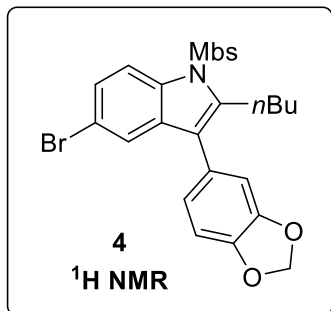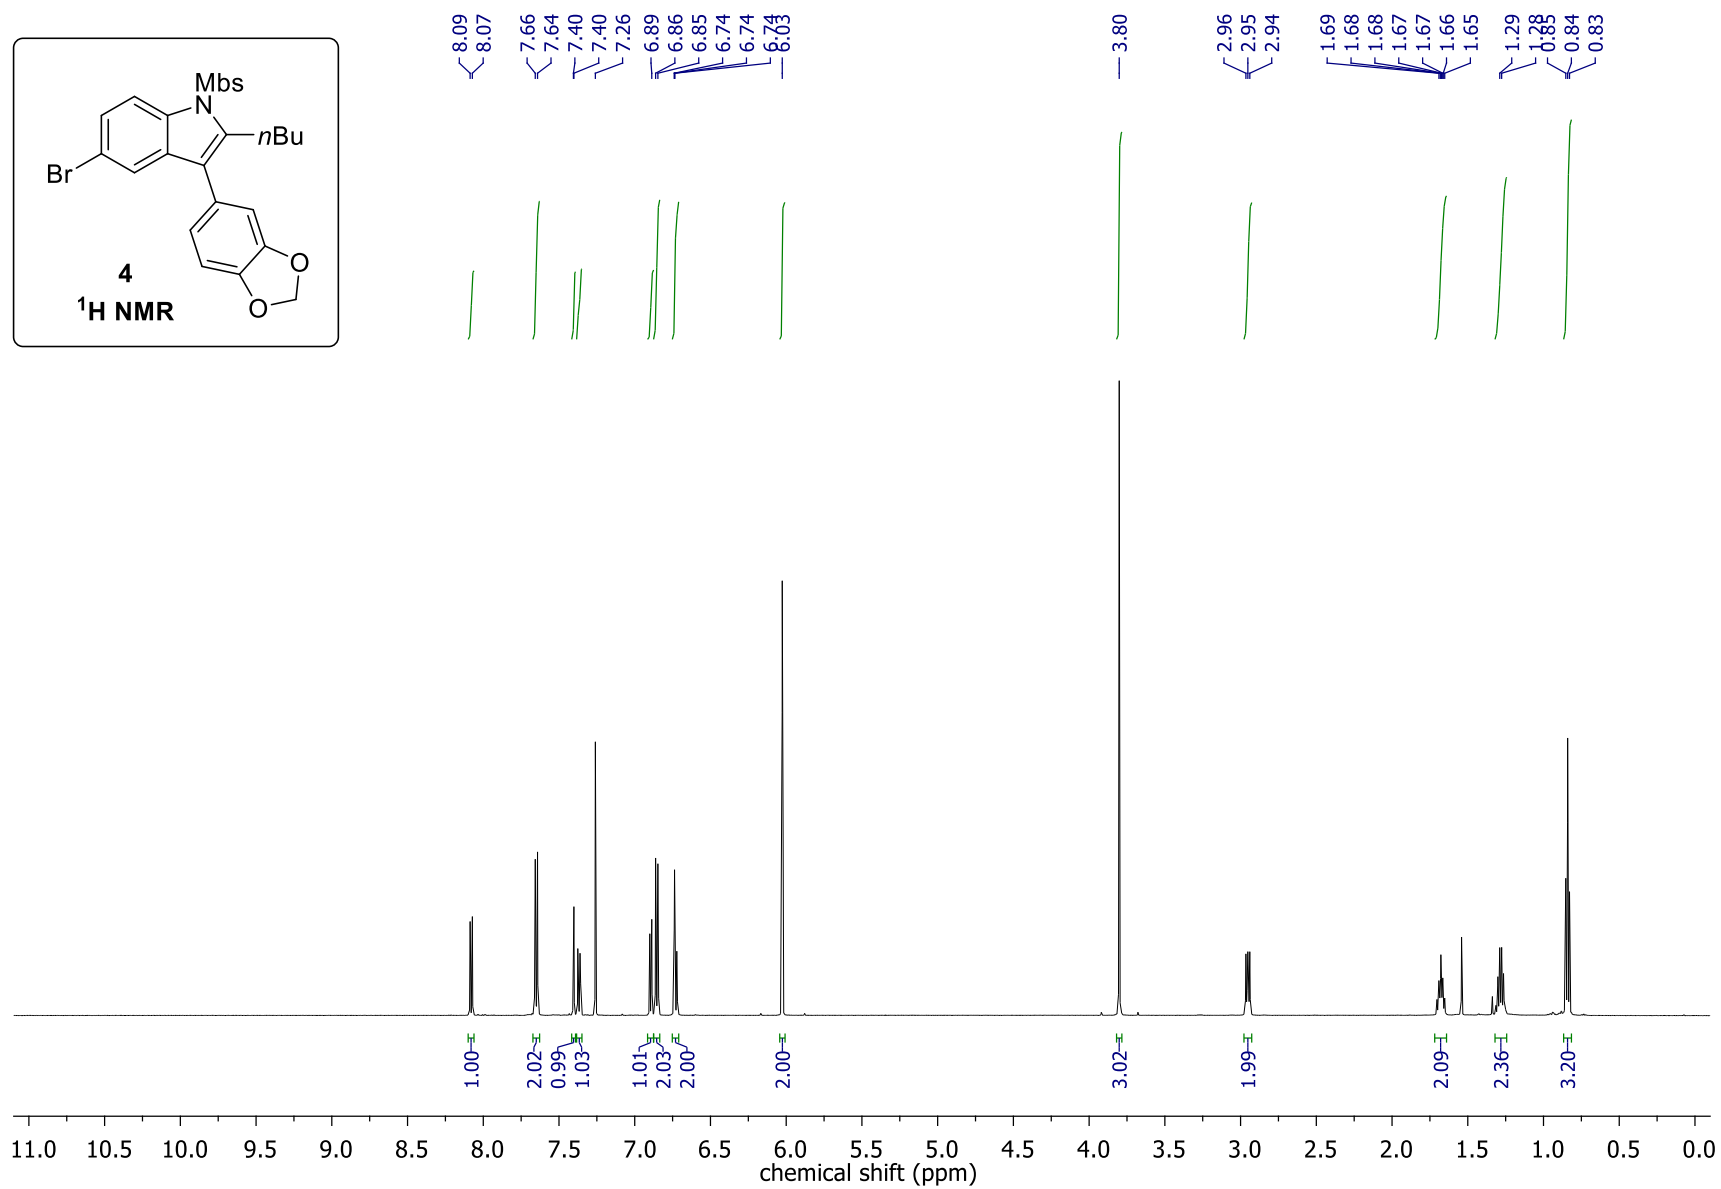

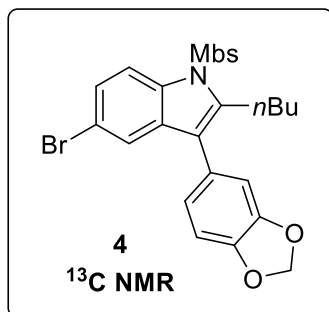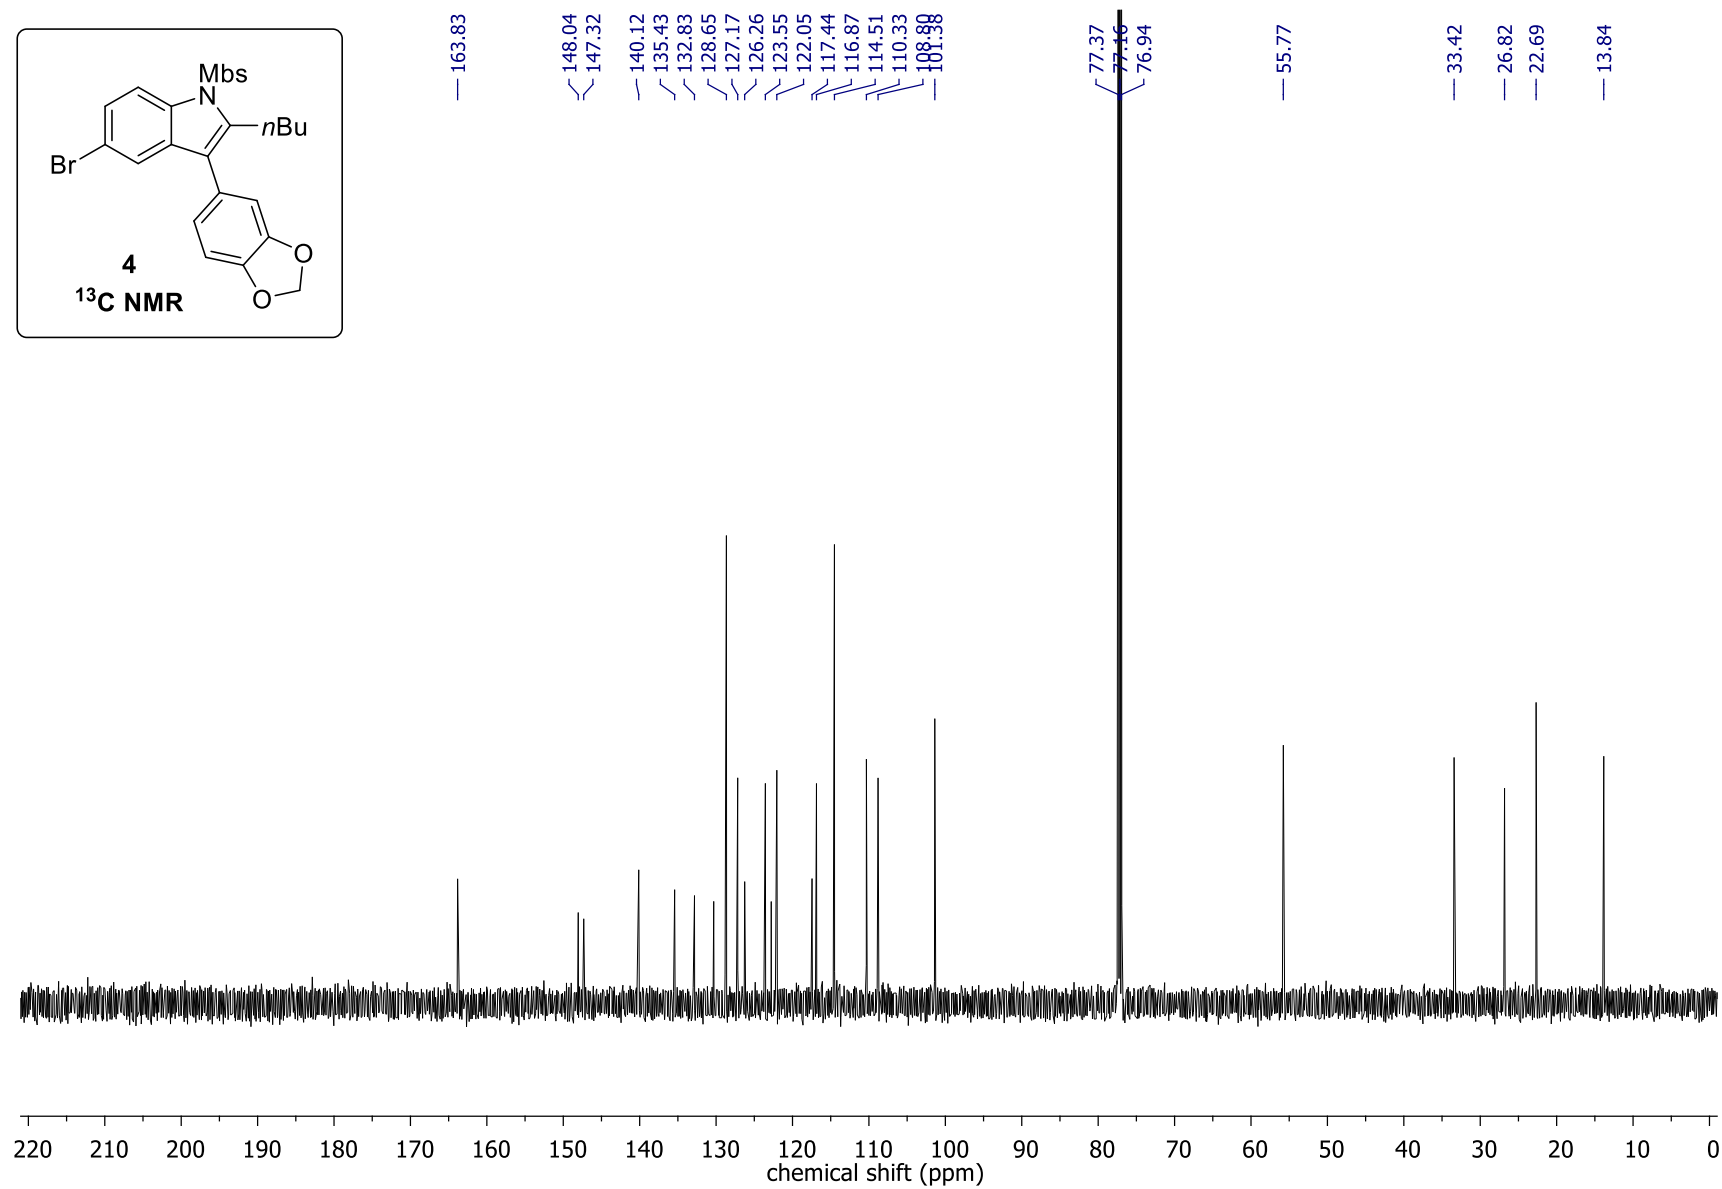

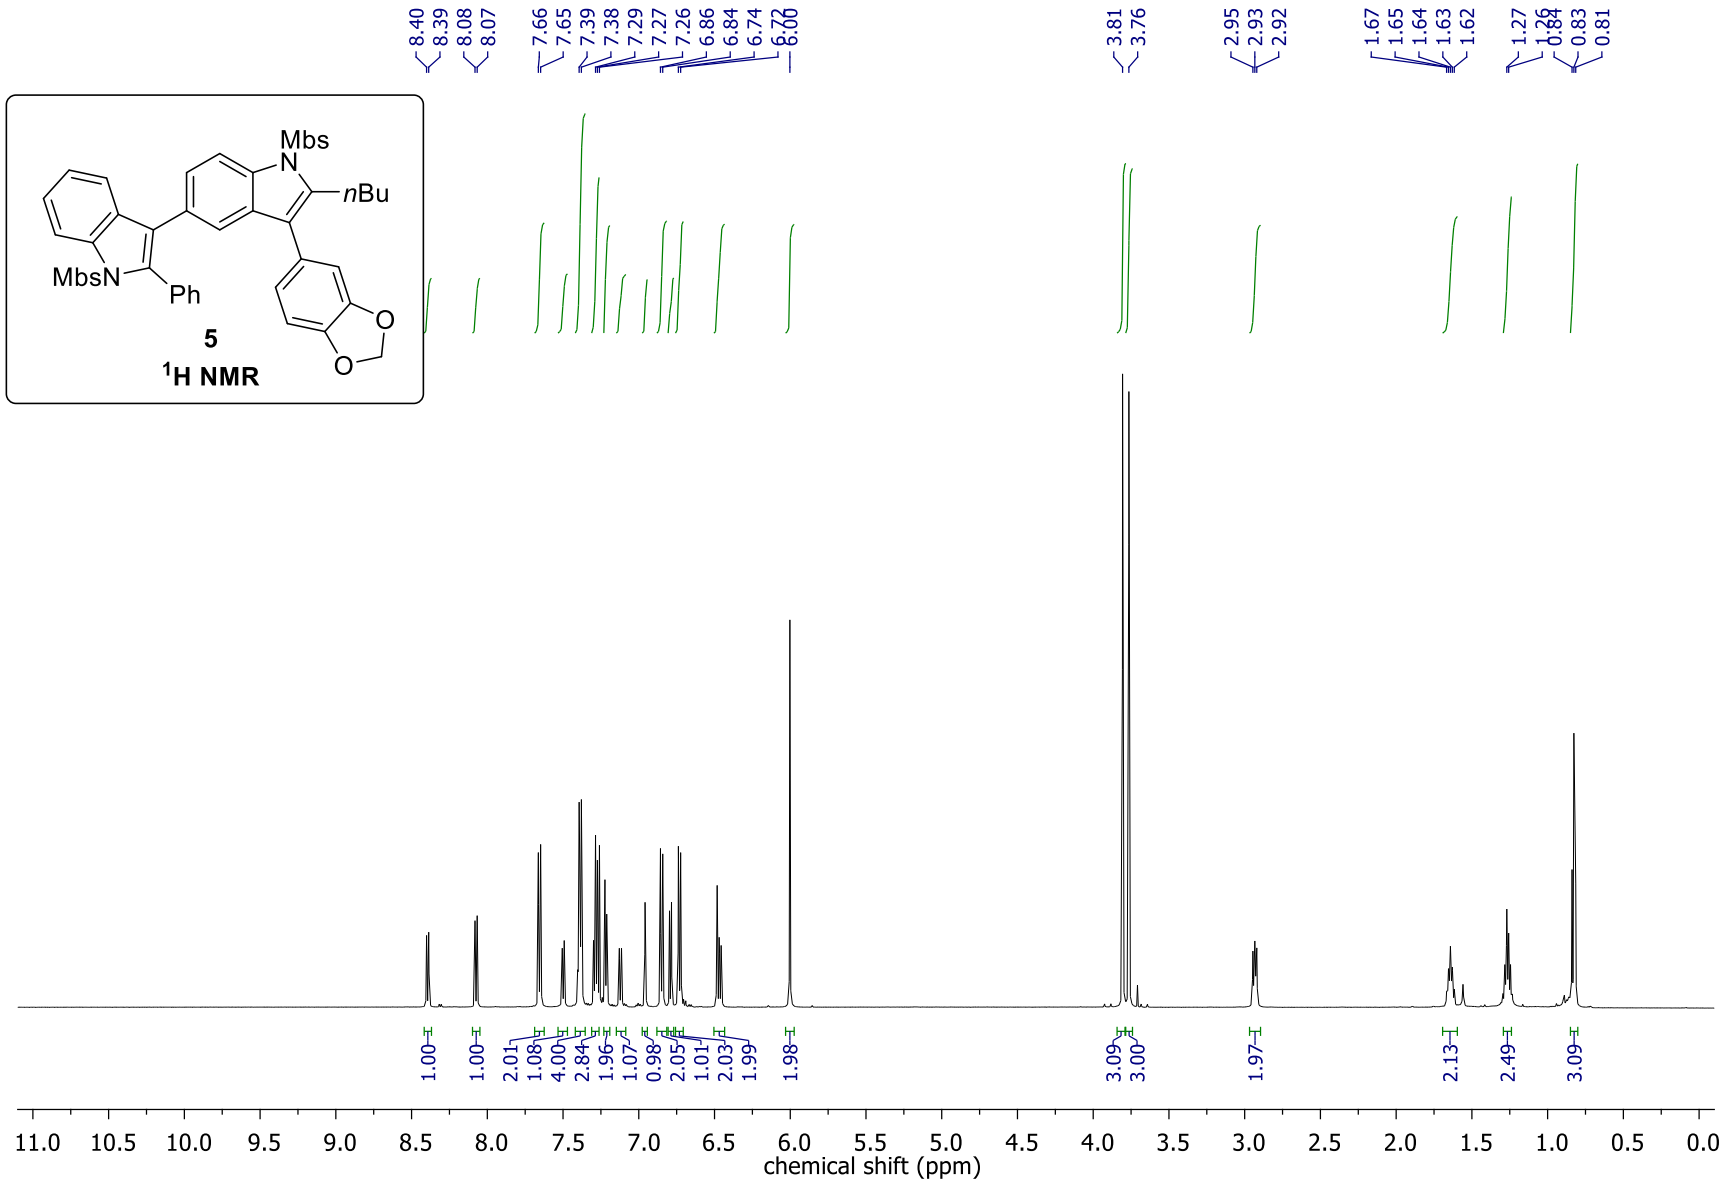

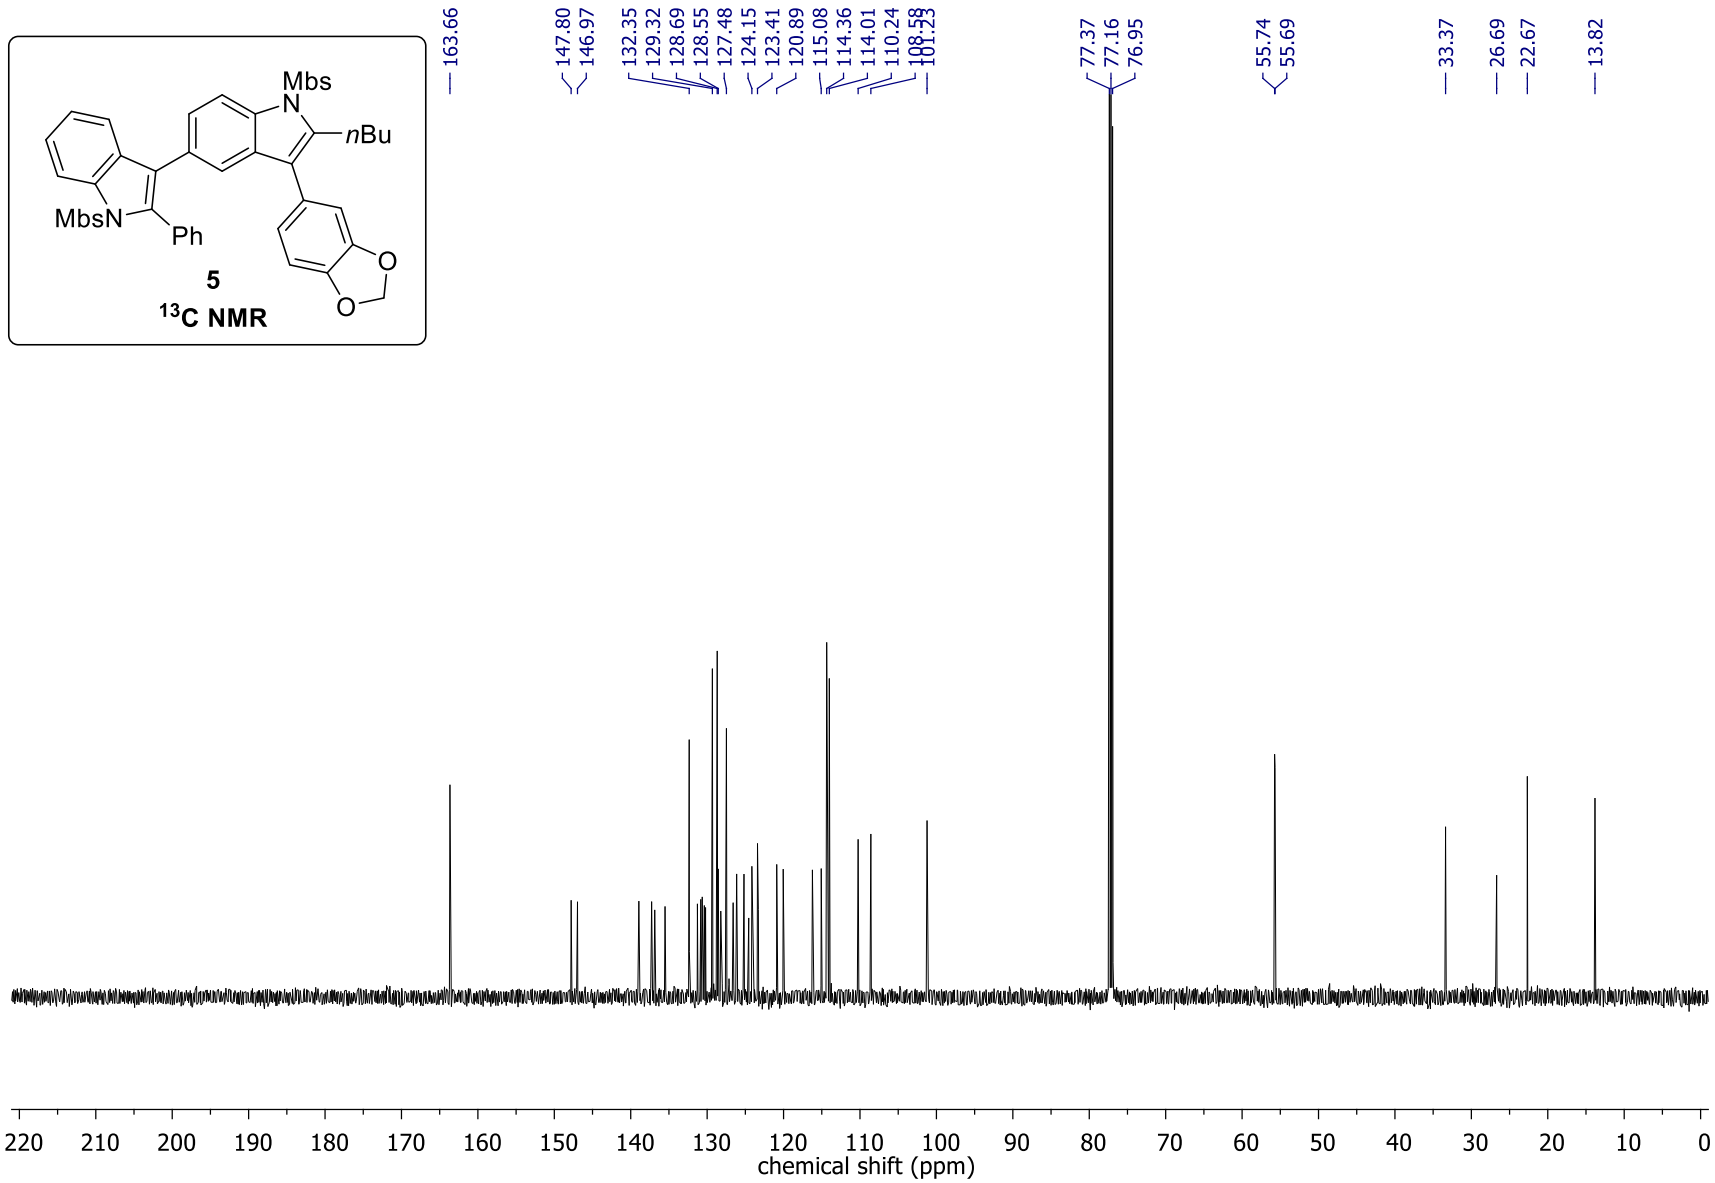



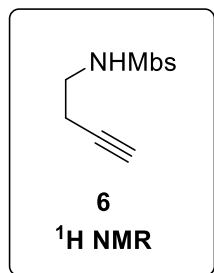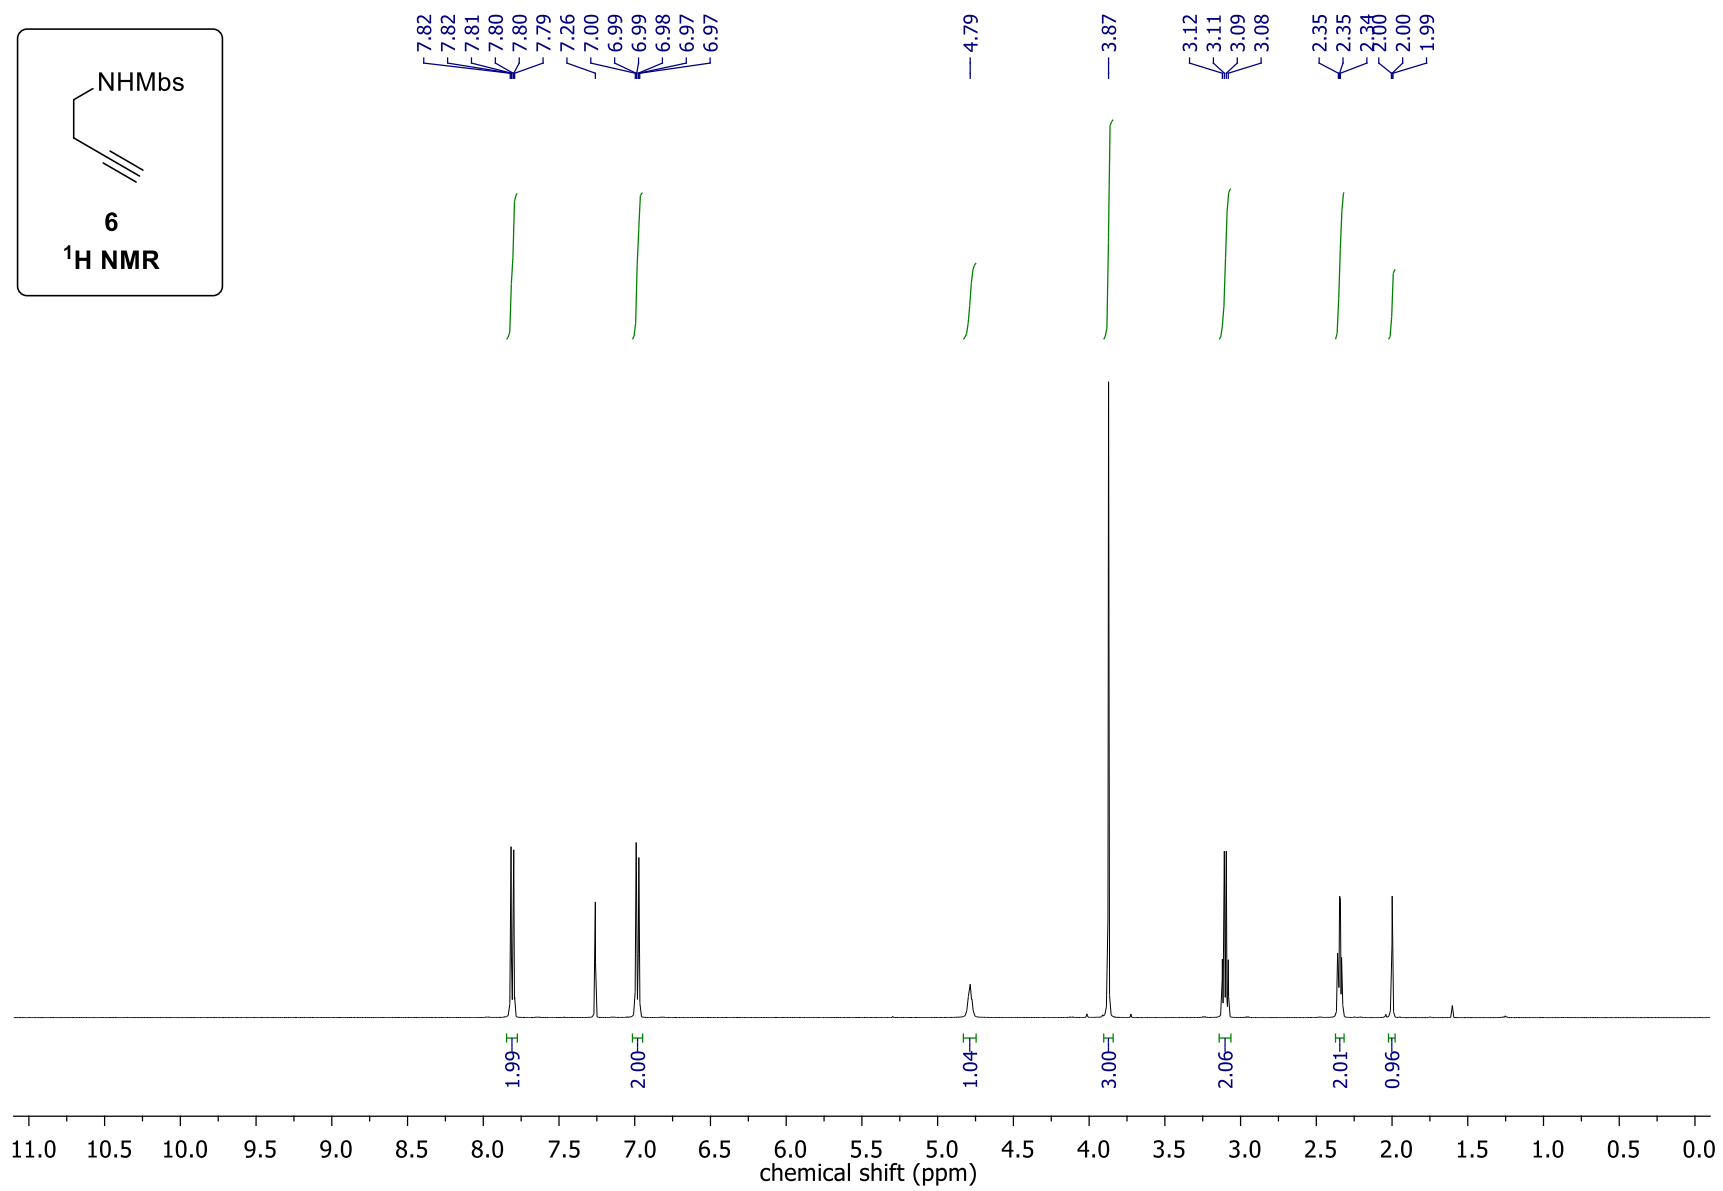

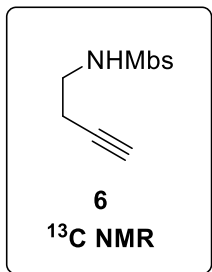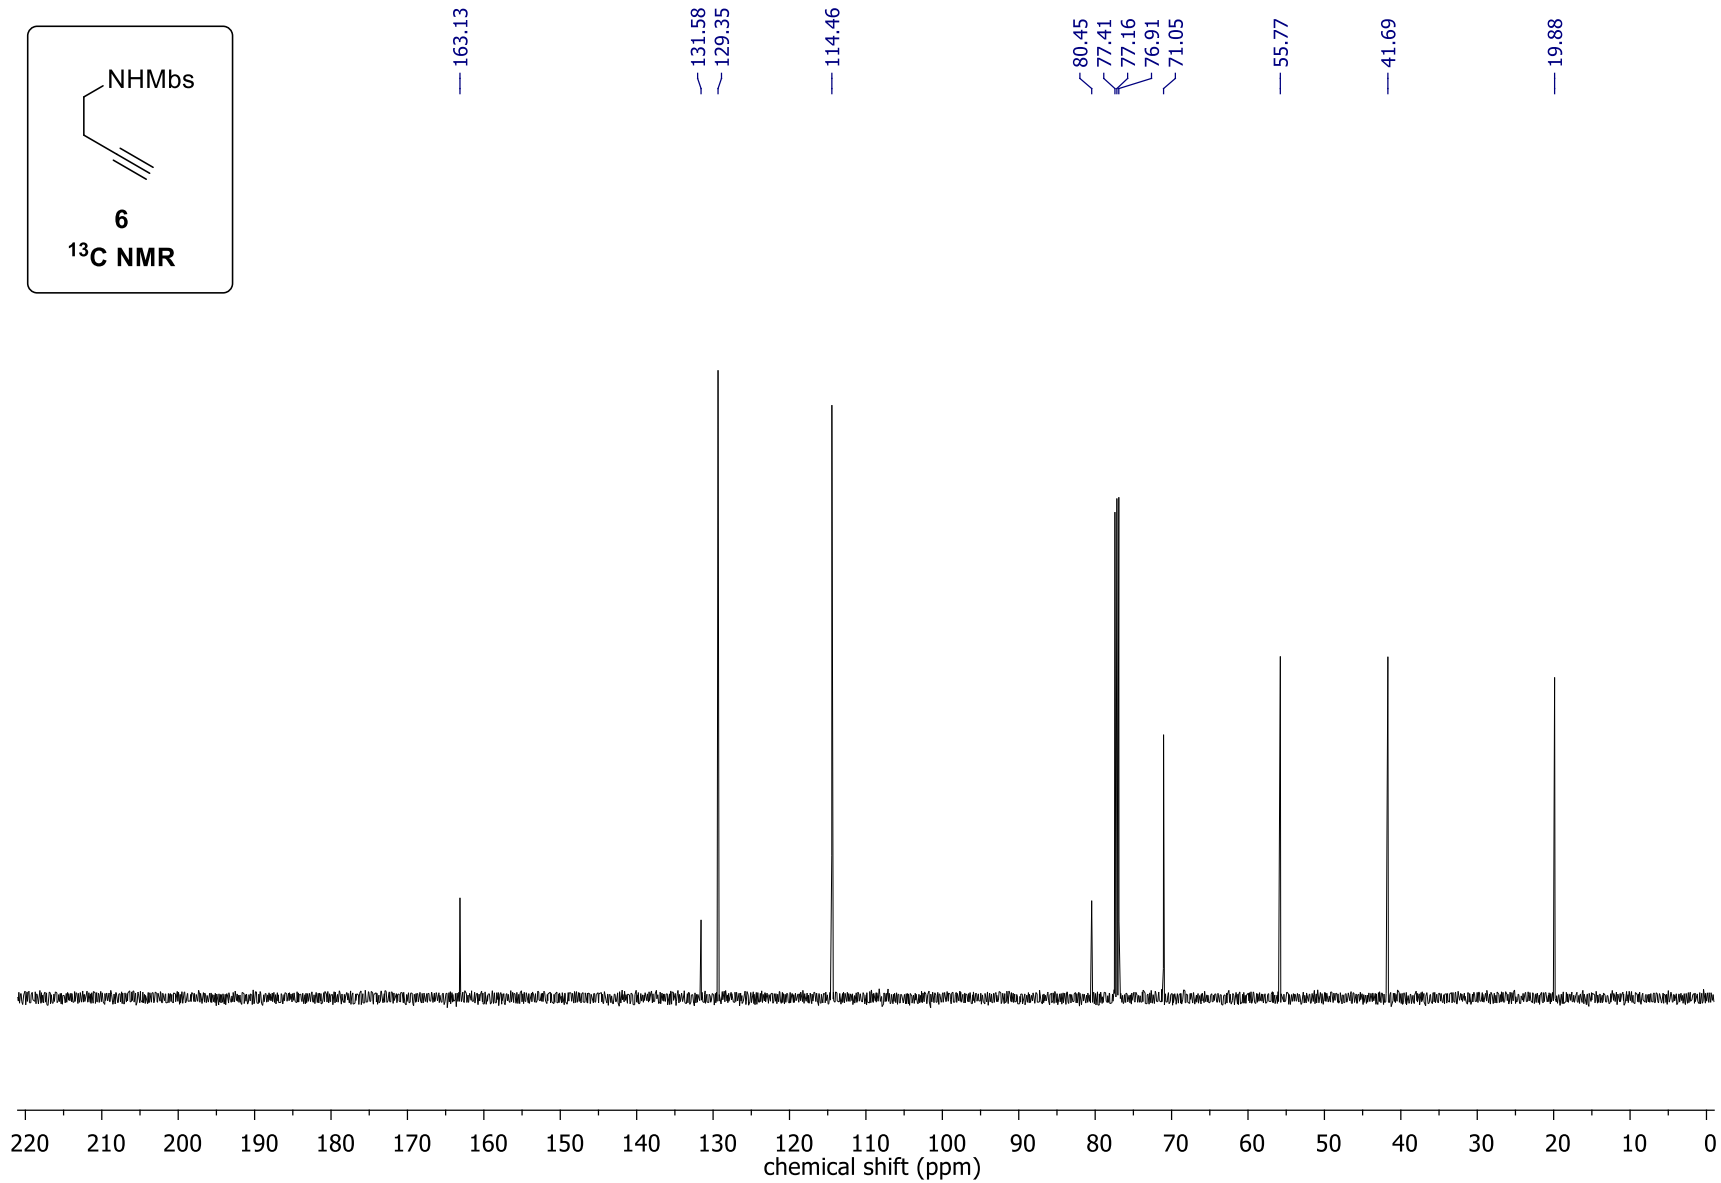

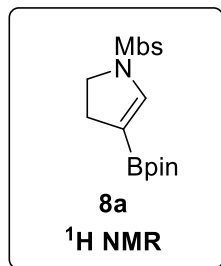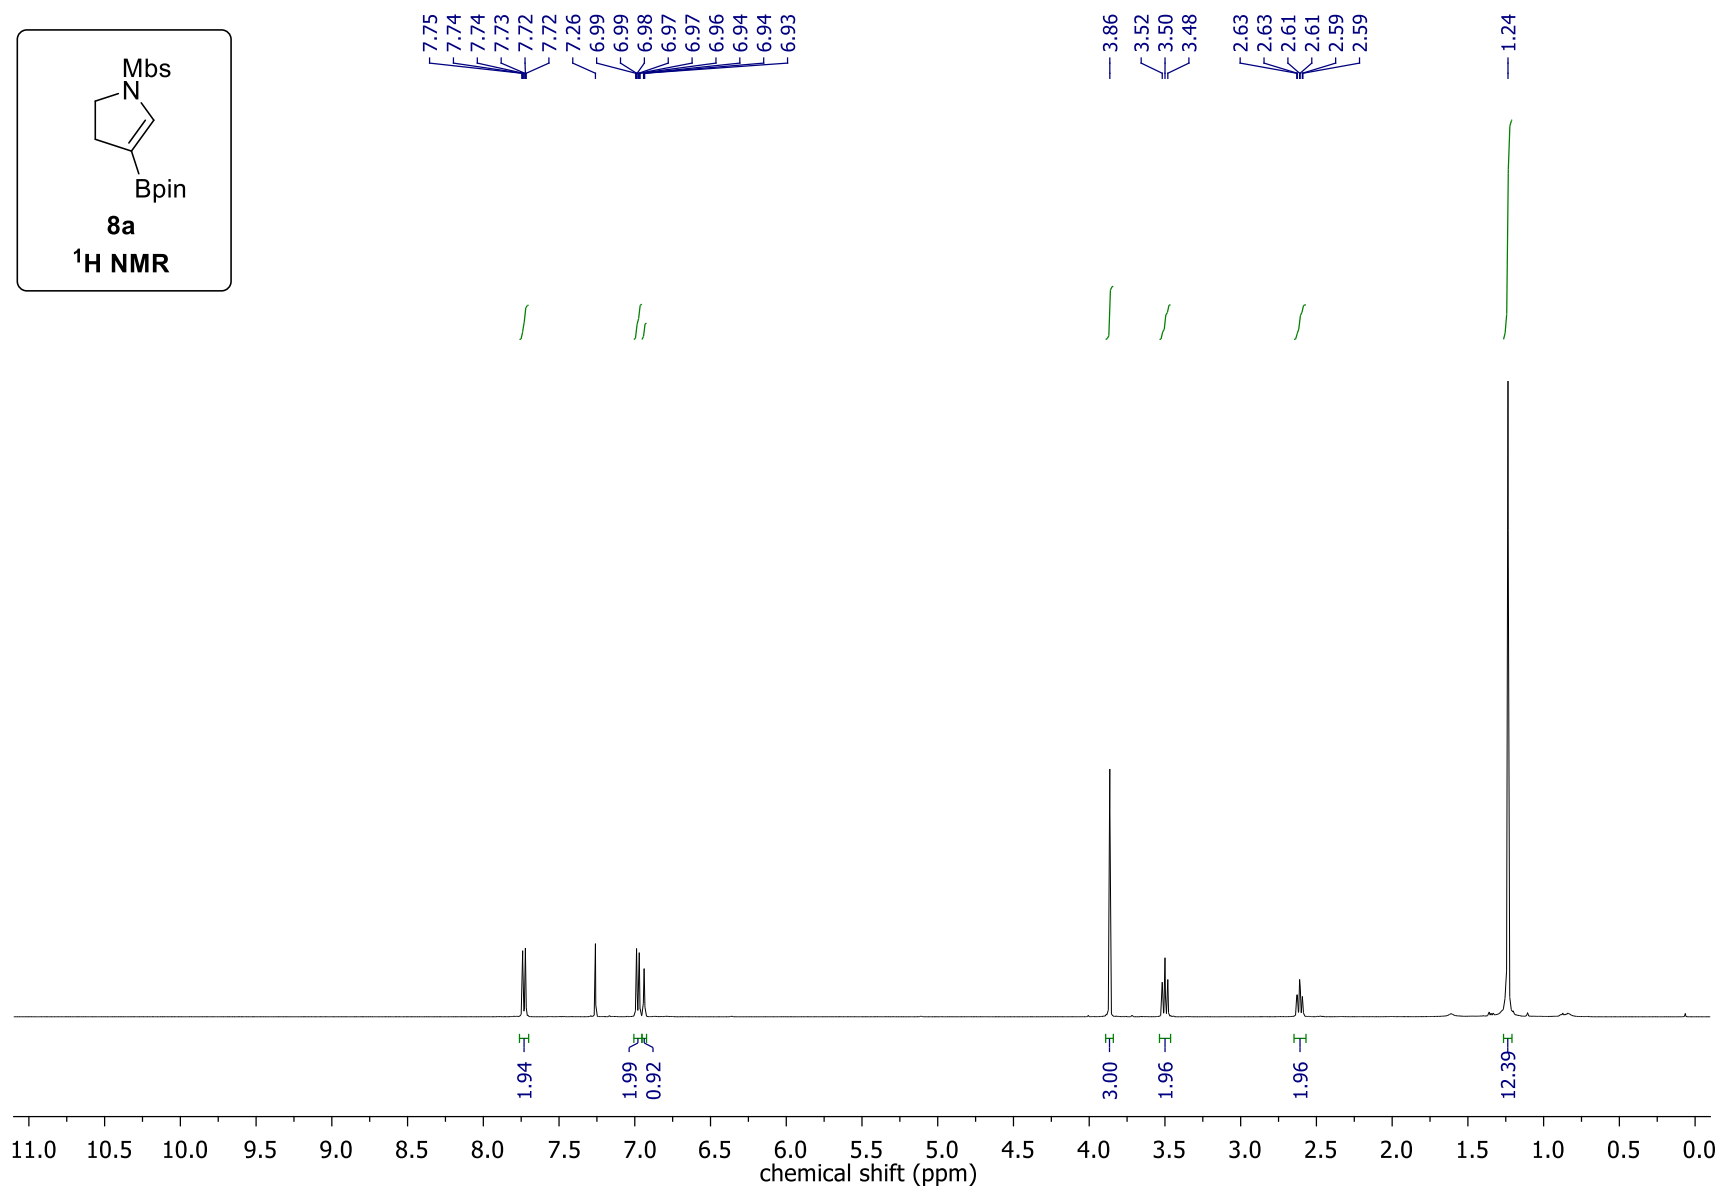

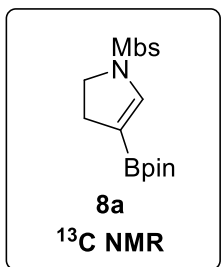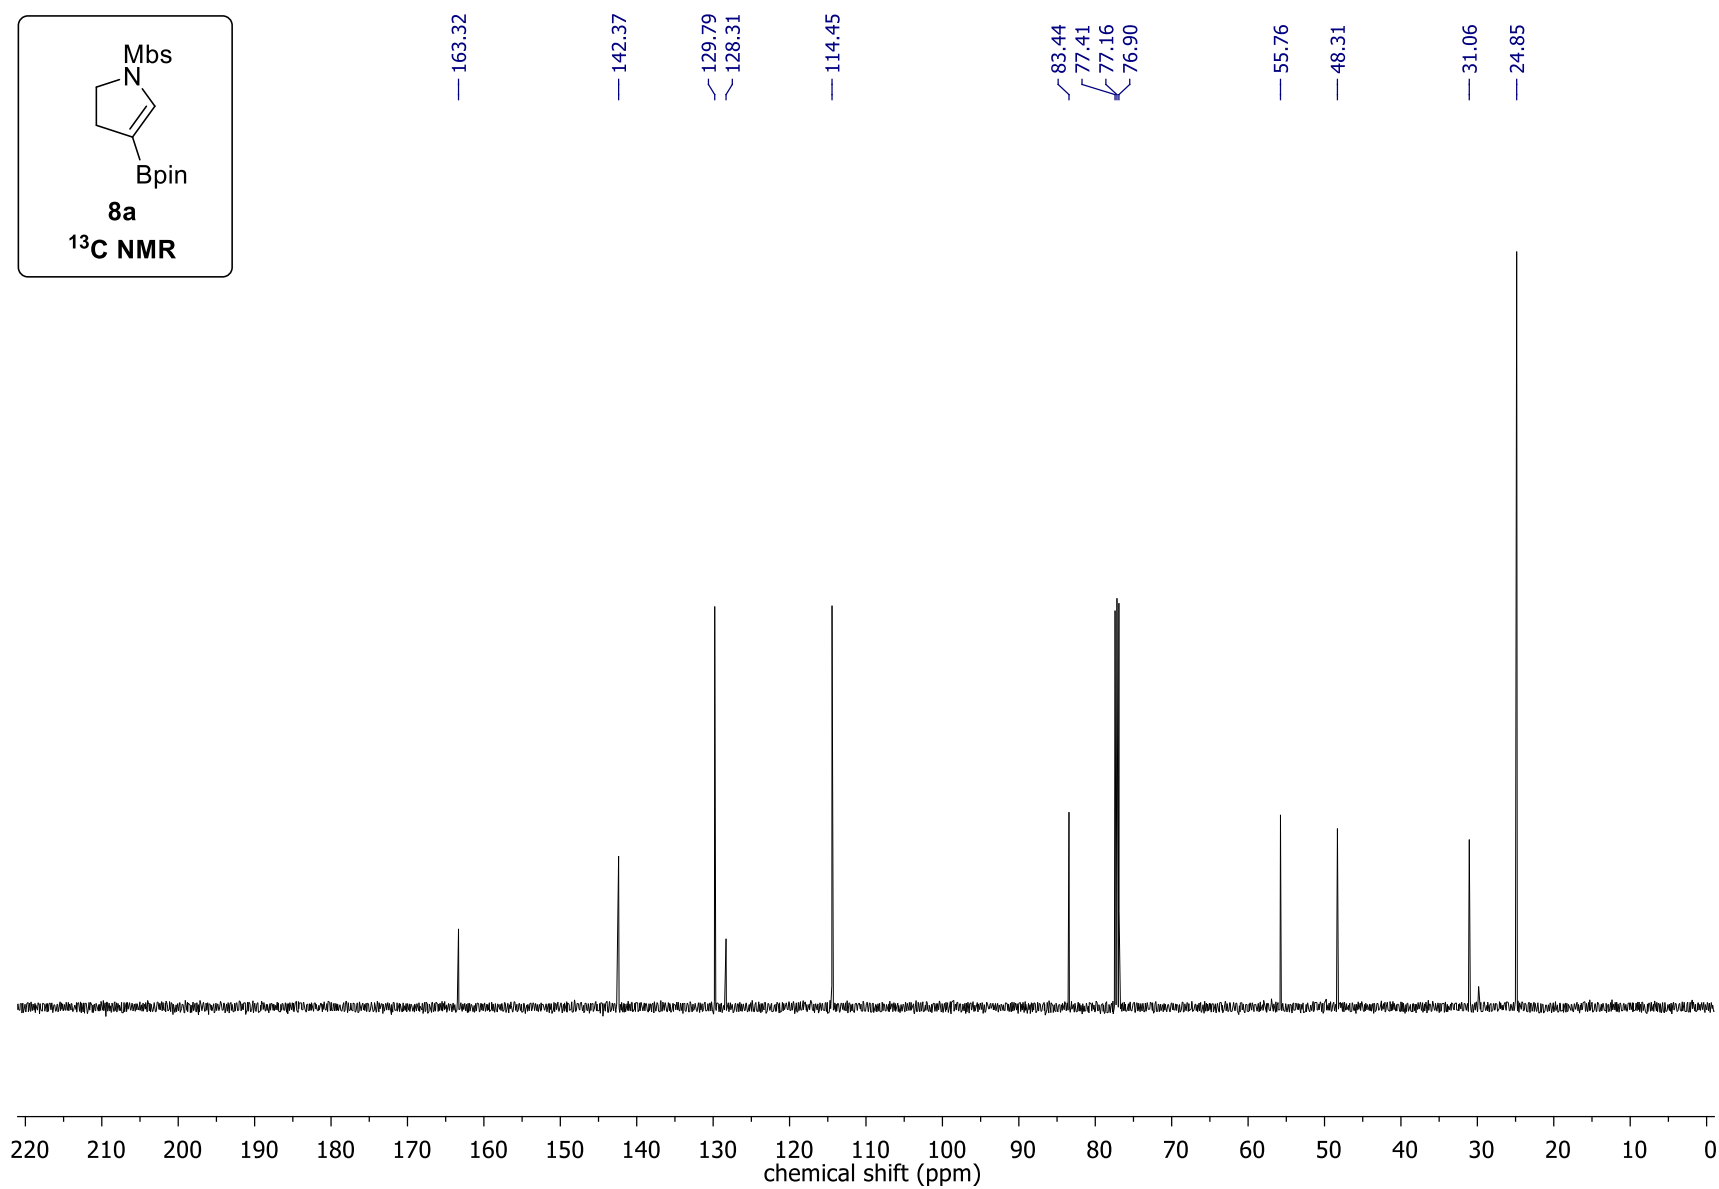

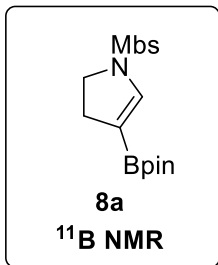

— 29.48

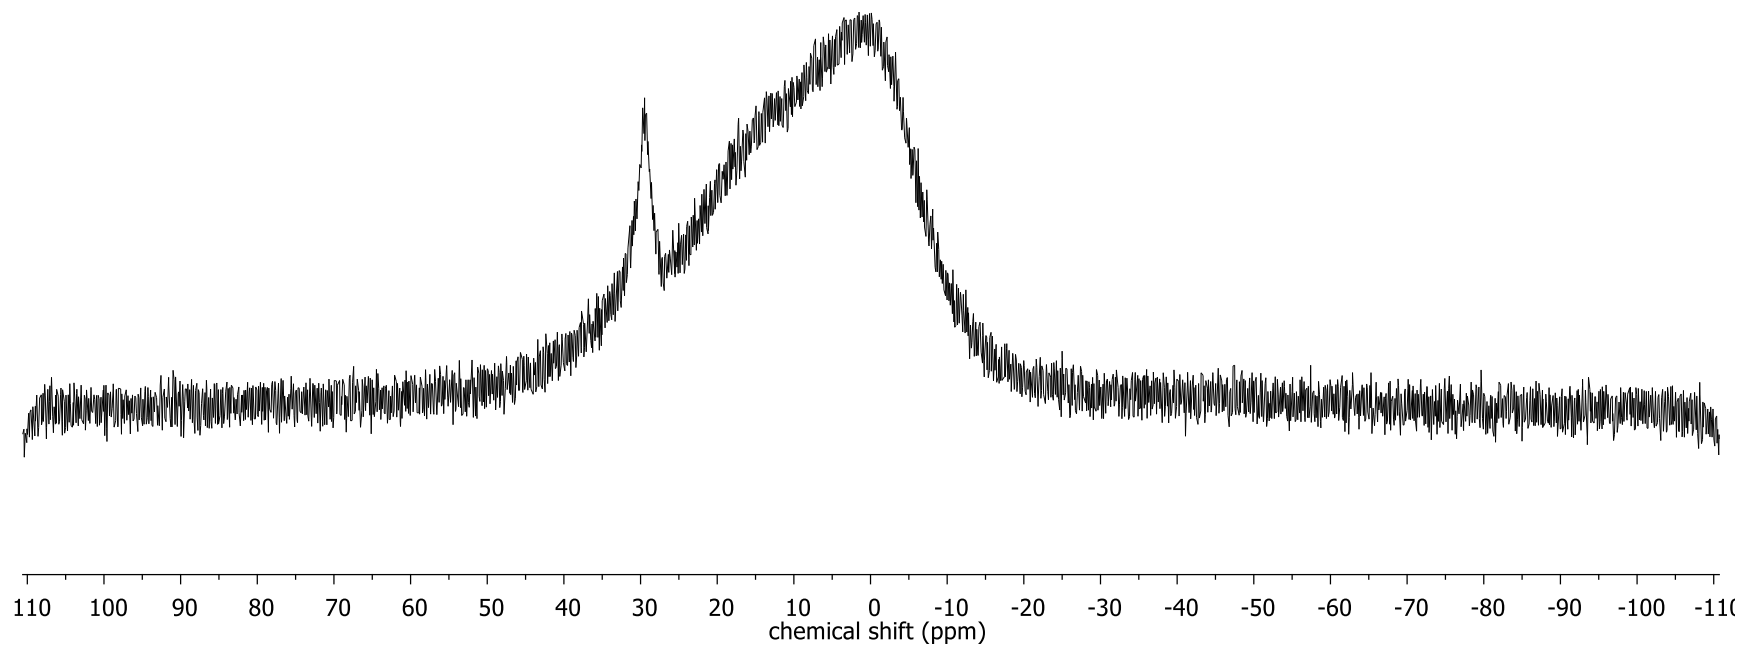

## References

- (1) Biasiolo, L.; Trinchillo, M.; Belanzoni, P.; Belpassi, L.; Busico, V.; Ciancaleoni, G.; D'Amora, A.; Macchioni, A.; Tarantelli, F.; Zuccaccia, D. *Chem.–Eur. J.* **2014**, *20*, 14594.
- (2) Shen, Z.; Lu, X. *Adv. Synth. Catal.* **2009**, *351*, 3107.
- (3) Yang, Y.; Zhang, X.; Zeng, W.; Huang, H.; Liang, Y. *RSC Advances* **2014**, *4*, 6090.
- (4) Sakai, N.; Annaka, K.; Fujita, A.; Sato, A.; Konakahara, T. *J. Org. Chem.* **2008**, *73*, 4160.
- (5) Yin, Y.; Ma, W.; Chai, Z.; Zhao, G. *J. Org. Chem.* **2007**, *72*, 5731.
- (6) Kofink, C. C.; Blank, B.; Pagano, S.; Gotz, N.; Knochel, P. *Chem. Commun.* **2007**, 1954.
- (7) Liu, J.; Xie, X.; Liu, Y. *Chem. Commun.* **2013**, *49*, 11794.
- (8) Nair, R. N.; Lee, P. J.; Rheingold, A. L.; Grotjahn, D. B. *Chem.–Eur. J.* **2010**, *16*, 7992.
- (9) Cantagrel, G.; de Carné-Caravalet, B.; Meyer, C.; Cossy, J. *Org. Lett.* **2009**, *11*, 4262.
- (10) Inamoto, K.; Asano, N.; Nakamura, Y.; Yonemoto, M.; Kondo, Y. *Org. Lett.* **2012**, *14*, 2622.
- (11) Jang, Y. H.; Youn, S. W. *Org. Lett.* **2014**, *16*, 3720.
- (12) Huang, J.; Macdonald, S. J. F.; Harrity, J. P. A. *Chem. Commun.* **2010**, *46*, 8770.
- (13) Garg, N. K.; Sarpong, R.; Stoltz, B. M. *J. Am. Chem. Soc.* **2002**, *124*, 13179.
- (14) Buchgraber, P.; Domostoj, M. M.; Scheiper, B.; Wirtz, C.; Mynott, R.; Rust, J.; Fürstner, A. *Tetrahedron* **2009**, *65*, 6519.
- (15) So, C. M.; Kume, S.; Hayashi, T. *J. Am. Chem. Soc.* **2013**, *135*, 10990.
